# Supplementary material for: Impact of National Drug Pricing Policy 2018 on access to medicines in Lahore division, Pakistan: a pre-post survey study using WHO/HAI methodology
Source: PubMed Central journal article supplement — BMJ Open. 2020 Oct 8;10(10):e034720. doi: 10.1136/bmjopen-2019-034720 (PMC7545625; doi:10.1136/bmjopen-2019-034720), 2020-10-08
Supplement: bmjopen-2019-034720.draft_revisions.pdf [file bmjopen-2019-034720.draft_revisions.pdf]

# BMJ Open

BMJ Open is committed to open peer review. As part of this commitment we make the peer review history of every article we publish publicly available.

When an article is published we post the peer reviewers' comments and the authors' responses online. We also post the versions of the paper that were used during peer review. These are the versions that the peer review comments apply to.

The versions of the paper that follow are the versions that were submitted during the peer review process. They are not the versions of record or the final published versions. They should not be cited or distributed as the published version of this manuscript.

BMJ Open is an open access journal and the full, final, typeset and author-corrected version of record of the manuscript is available on our site with no access controls, subscription charges or pay-per-view fees (<http://bmjopen.bmj.com>).

If you have any questions on BMJ Open's open peer review process please email [info.bmjopen@bmj.com](mailto:info.bmjopen@bmj.com)

# BMJ Open

## Impact of National Drug Pricing Policy 2018 on Access to Medicines in Lahore Division, Pakistan: A Pre-Post Survey Study Using WHO/HAI Methodology

|                               |                                                                                                                                                                                                                                                                                                                                                                                                                                                                                                                                                                                                                                                                                                                                                                                                                                                                                                                                                                                                                                                                                                                                                                                                                                                                                                                                                                                                                                                                                                                                                                                                                                                                                                                                                                                                                                                                                                                                                                                                                                                                                                                                                                                                                                                                                                                                                                                                                                                                                                                                                                                                                                                                                |
|-------------------------------|--------------------------------------------------------------------------------------------------------------------------------------------------------------------------------------------------------------------------------------------------------------------------------------------------------------------------------------------------------------------------------------------------------------------------------------------------------------------------------------------------------------------------------------------------------------------------------------------------------------------------------------------------------------------------------------------------------------------------------------------------------------------------------------------------------------------------------------------------------------------------------------------------------------------------------------------------------------------------------------------------------------------------------------------------------------------------------------------------------------------------------------------------------------------------------------------------------------------------------------------------------------------------------------------------------------------------------------------------------------------------------------------------------------------------------------------------------------------------------------------------------------------------------------------------------------------------------------------------------------------------------------------------------------------------------------------------------------------------------------------------------------------------------------------------------------------------------------------------------------------------------------------------------------------------------------------------------------------------------------------------------------------------------------------------------------------------------------------------------------------------------------------------------------------------------------------------------------------------------------------------------------------------------------------------------------------------------------------------------------------------------------------------------------------------------------------------------------------------------------------------------------------------------------------------------------------------------------------------------------------------------------------------------------------------------|
| Journal:                      | <i>BMJ Open</i>                                                                                                                                                                                                                                                                                                                                                                                                                                                                                                                                                                                                                                                                                                                                                                                                                                                                                                                                                                                                                                                                                                                                                                                                                                                                                                                                                                                                                                                                                                                                                                                                                                                                                                                                                                                                                                                                                                                                                                                                                                                                                                                                                                                                                                                                                                                                                                                                                                                                                                                                                                                                                                                                |
| Manuscript ID                 | bmjopen-2019-034720                                                                                                                                                                                                                                                                                                                                                                                                                                                                                                                                                                                                                                                                                                                                                                                                                                                                                                                                                                                                                                                                                                                                                                                                                                                                                                                                                                                                                                                                                                                                                                                                                                                                                                                                                                                                                                                                                                                                                                                                                                                                                                                                                                                                                                                                                                                                                                                                                                                                                                                                                                                                                                                            |
| Article Type:                 | Original research                                                                                                                                                                                                                                                                                                                                                                                                                                                                                                                                                                                                                                                                                                                                                                                                                                                                                                                                                                                                                                                                                                                                                                                                                                                                                                                                                                                                                                                                                                                                                                                                                                                                                                                                                                                                                                                                                                                                                                                                                                                                                                                                                                                                                                                                                                                                                                                                                                                                                                                                                                                                                                                              |
| Date Submitted by the Author: | 03-Oct-2019                                                                                                                                                                                                                                                                                                                                                                                                                                                                                                                                                                                                                                                                                                                                                                                                                                                                                                                                                                                                                                                                                                                                                                                                                                                                                                                                                                                                                                                                                                                                                                                                                                                                                                                                                                                                                                                                                                                                                                                                                                                                                                                                                                                                                                                                                                                                                                                                                                                                                                                                                                                                                                                                    |
| Complete List of Authors:     | <p>Saeed, Amna; Xi'an Jiaotong University, 1 Department of Pharmacy Administration and Clinical Pharmacy, School of Pharmacy, Xi'an Jiaotong University, Shaanxi, China, 2 Center for Drug Safety and Policy Research, Xian Jiaotong University, Xi'an, Shaanxi, China, 3 Shaanxi Centre for Health Reform and Development Research, Shaanxi, China</p> <p>Saeed, H; University of the Punjab, University College of Pharmacy Saleem, Zikria; Universiti Sains Malaysia, School of Pharmaceutical Sciences</p> <p>Yang, Caijun; Xi'an Jiaotong University, 1 Department of Pharmacy Administration and Clinical Pharmacy, School of Pharmacy, Xi'an Jiaotong University, Shaanxi, China, 2 Center for Drug Safety and Policy Research, Xian Jiaotong University, Xi'an, Shaanxi, China, 3 Shaanxi Centre for Health Reform and Development Research, Shaanxi, China</p> <p>Jiang, Minghuan; Xi'an Jiaotong University, 1 Department of Pharmacy Administration and Clinical Pharmacy, School of Pharmacy, Xi'an Jiaotong University, Shaanxi, China, 2 Center for Drug Safety and Policy Research, Xian Jiaotong University, Xi'an, Shaanxi, China, 3 Shaanxi Centre for Health Reform and Development Research, Shaanxi, China</p> <p>Zhao, Mingyue; Xi'an Jiaotong University, 1 Department of Pharmacy Administration and Clinical Pharmacy, School of Pharmacy, Xi'an Jiaotong University, Shaanxi, China, 2 Center for Drug Safety and Policy Research, Xian Jiaotong University, Xi'an, Shaanxi, China, 3 Shaanxi Centre for Health Reform and Development Research, Shaanxi, China</p> <p>Ji, Wenjing ; Xi'an Jiaotong University, 1 Department of Pharmacy Administration and Clinical Pharmacy, School of Pharmacy, Xi'an Jiaotong University, Shaanxi, China, 2 Center for Drug Safety and Policy Research, Xian Jiaotong University, Xi'an, Shaanxi, China, 3 Shaanxi Centre for Health Reform and Development Research, Shaanxi, China</p> <p>Aziz, Muhammad Majid; Xi'an Jiaotong University, 1 Department of Pharmacy Administration and Clinical Pharmacy, School of Pharmacy, Xi'an Jiaotong University, Shaanxi, China, 2 Center for Drug Safety and Policy Research, Xian Jiaotong University, Xi'an, Shaanxi, China, 3 Shaanxi Centre for Health Reform and Development Research, Shaanxi, China</p> <p>Khan, Faiz; Xi'an Jiaotong University, 1 Department of Pharmacy Administration and Clinical Pharmacy, School of Pharmacy, Xi'an Jiaotong University, Shaanxi, China, 2 Center for Drug Safety and Policy Research, Xian Jiaotong University, Xi'an, Shaanxi, China, 3 Shaanxi Centre for Health Reform and Development Research, Shaanxi, China</p> |

|           |                                                                                                                                                                                                                                                                                                                                                                                                                                                                                                                                                                                                                                                                                                                                                                                                                                                                                                                                                                                                                                                                                                                     |
|-----------|---------------------------------------------------------------------------------------------------------------------------------------------------------------------------------------------------------------------------------------------------------------------------------------------------------------------------------------------------------------------------------------------------------------------------------------------------------------------------------------------------------------------------------------------------------------------------------------------------------------------------------------------------------------------------------------------------------------------------------------------------------------------------------------------------------------------------------------------------------------------------------------------------------------------------------------------------------------------------------------------------------------------------------------------------------------------------------------------------------------------|
|           | Gillani, Ali Hassan; Xi'an Jiaotong University, 1 Department of Pharmacy Administration and Clinical Pharmacy, School of Pharmacy, Xi'an Jiaotong University, Shaanxi, China, 2 Center for Drug Safety and Policy Research, Xian Jiaotong University, Xi'an, Shaanxi, China, 3 Shaanxi Centre for Health Reform and Development Research, Shaanxi, China<br>Atif, Naveel; Xi'an Jiaotong University, 1 Department of Pharmacy Administration and Clinical Pharmacy, School of Pharmacy, Xi'an Jiaotong University, Shaanxi, China, 2 Center for Drug Safety and Policy Research, Xian Jiaotong University, Xi'an, Shaanxi, China, 3 Shaanxi Centre for Health Reform and Development Research, Shaanxi, China<br>Fang, Yu; Xi'an Jiaotong University, 1 Department of Pharmacy Administration and Clinical Pharmacy, School of Pharmacy, Xi'an Jiaotong University, Shaanxi, China, 2 Center for Drug Safety and Policy Research, Xian Jiaotong University, Xi'an, Shaanxi, China, 3 Shaanxi Centre for Health Reform and Development Research, Shaanxi, China<br>Babar, Zaheer Ud Din; University of Huddersfield, |
| Keywords: | HEALTH ECONOMICS, Health policy < HEALTH SERVICES ADMINISTRATION & MANAGEMENT, Pharmacology < TROPICAL MEDICINE                                                                                                                                                                                                                                                                                                                                                                                                                                                                                                                                                                                                                                                                                                                                                                                                                                                                                                                                                                                                     |
|           |                                                                                                                                                                                                                                                                                                                                                                                                                                                                                                                                                                                                                                                                                                                                                                                                                                                                                                                                                                                                                                                                                                                     |

SCHOLARONE™  
Manuscripts

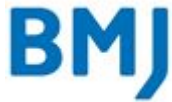

I, the Submitting Author has the right to grant and does grant on behalf of all authors of the Work (as defined in the below author licence), an exclusive licence and/or a non-exclusive licence for contributions from authors who are: i) UK Crown employees; ii) where BMJ has agreed a CC-BY licence shall apply, and/or iii) in accordance with the terms applicable for US Federal Government officers or employees acting as part of their official duties; on a worldwide, perpetual, irrevocable, royalty-free basis to BMJ Publishing Group Ltd ("BMJ") its licensees and where the relevant Journal is co-owned by BMJ to the co-owners of the Journal, to publish the Work in this journal and any other BMJ products and to exploit all rights, as set out in our [licence](#).

The Submitting Author accepts and understands that any supply made under these terms is made by BMJ to the Submitting Author unless you are acting as an employee on behalf of your employer or a postgraduate student of an affiliated institution which is paying any applicable article publishing charge ("APC") for Open Access articles. Where the Submitting Author wishes to make the Work available on an Open Access basis (and intends to pay the relevant APC), the terms of reuse of such Open Access shall be governed by a Creative Commons licence – details of these licences and which [Creative Commons](#) licence will apply to this Work are set out in our licence referred to above.

Other than as permitted in any relevant BMJ Author's Self Archiving Policies, I confirm this Work has not been accepted for publication elsewhere, is not being considered for publication elsewhere and does not duplicate material already published. I confirm all authors consent to publication of this Work and authorise the granting of this licence.

# Impact of National Drug Pricing Policy 2018 on Access to Medicines in Lahore Division, Pakistan: A Pre-Post Survey Study Using WHO/HAI Methodology

Amna Saeed<sup>1,2,3</sup>, Hamid Saeed<sup>4</sup>, Zikria Saleem<sup>5</sup>, Caijun Yang<sup>1,2,3</sup>, Minghuan Jiang<sup>1,2,3</sup>, Mingyue Zhao<sup>1,2,3</sup>, Wenjing Ji<sup>1,2,3</sup>, Muhammad Majid Aziz<sup>1,2,3</sup>, Faiz Ullah Khan<sup>1,2,3</sup>, Ali Hassan Gillani<sup>1,2,3</sup>, Naveel Atif<sup>1,2,3</sup>, Yu Fang<sup>1,2,3</sup>, and Zaheer Ud Din Babar<sup>6</sup>

1 Department of Pharmacy Administration and Clinical Pharmacy, School of Pharmacy, Xi'an Jiaotong University, Shaanxi, China,

2 Center for Drug Safety and Policy Research, Xian Jiaotong University, Xi'an, Shaanxi, China,

3 Shaanxi Centre for Health Reform and Development Research, Shaanxi, China,

4 University College of Pharmacy, University of the Punjab, Lahore, Pakistan,

5 School of Pharmaceutical Sciences, Universiti Sains Malaysia, Malaysia,

6 Department of Pharmacy, School of Applied Sciences, University of Huddersfield, Huddersfield, West Yorkshire, United Kingdom.

**Correspondence:** Yu Fang, PhD, Professor Department of Pharmacy Administration and Clinical Pharmacy, School of Pharmacy, Xi'an Jiaotong University, Center for Drug Safety and Policy Research, Xi'an Jiaotong University 76 Yanta West Road Xi'an 710061 People, s Republic of China

Tell: +86-29-82655132

Mobile: 18591970591

Fax: +86-29-82655424

Email: yufang@mail.xjtu.edu.cn

**Word Count:** 4899

## Abstract

**Objective:** To evaluate the impact of new national drug pricing policy (NDPP) 2018 on access to medicines in terms of prices, availability and affordability.

**Design:** Two cross-sectional surveys were undertaken before and after the launch of NDPP 2018, using a modified WHO/HAI methodology.

**Setting:** Four districts of Lahore division, Pakistan.

**Participants:** 16 public sector hospitals and 16 private sector retail pharmacies.

**Measures:** The pre and post survey data on price and availability of Lowest Price Generics (LPGs) and Originator Brands (OBs) of 50 medicines were obtained by visiting the same public and private sector health facilities (n=32). 46 out of 50 surveyed medicines were from National Essential Medicines List. Inflation-adjusted median unit prices (MUPs) and median price ratios (MPRs) from 2019 were used for price comparison. Affordability was calculated in terms of number of days' wages required to get a standard treatment by the lowest paid unskilled government worker.

**Results:** The overall mean percent availabilities remained poor in both years i.e. far less than 80%. In public sector, the mean percent availability of OBs improved from 6.8% to 33.1% whereas, in case of LPGs it was reduced from 35.1% to 9%. In private sector, the mean percent availability of both OBs and LPGs demonstrated slight improvements in 2019 i.e. 55.0% to 58.3% and 20.3% to 32.3%. The adjusted MUPs and MPRs of OBs significantly increased by a median of 4.29% (Wilcoxon test  $p=0.001$ ,  $p=0.0001$ ). Whereas, the adjusted MUPs and MPRs of LPGs were increased by a median of 15.7% ( $p=0.002$ ,  $p=0.0002$ ). Overall the affordability of many medicines for common ailments reduced significantly in 2019.

**Conclusions:** The availability of medicines has been slightly improved, except in the case of LPGs which was reduced at public sector. Although the main aim of the NDPP 2018 was to make the drugs affordable, but its implementation has led to increased drug prices which has made standard treatment for some of the most prevalent ailments, unaffordable. This policy needs to be improved further to have strict price control especially for the essential medicines, to improve their access.

### Strengths

- This is the first study of its kind from Pakistan, where pre-post surveys were conducted and analyzed to estimate the impact of a national drug pricing policy, using the WHO/HAI methodology.
- The data was collected from the same health facilities in both years. So, the comparison is reliable. This study provides an objective evidence to the policy makers for improving the current pricing policies.

### Limitations

- The study is limited to only one division of Pakistan, although the medicine prices are fixed centrally and are supposed to be same across the country – affecting generalizability of the findings.
- Moreover, this study is conducted after about a year from the launch of new drug pricing policy 2018, so the results do not reflect the long term impact of the policy.

## Introduction

Access to quality assured and affordable essential medicines is considered as a key component of an effective healthcare system. It has also been pledged under Sustainable Development Goal (SDG) 3 by United Nations (UN) that the equitable access to affordable essential medicines will be ensured as a basic human right [1, 2]. Pakistani government, like many other Low and Middle Income Countries (LMICs), has been grappling with the issue of high medicine prices and poor availability of medicines that compromises the accessibility of medicines [1, 3-6]. The medicines are provided free of cost at public sector health facilities, while patient pays out of pocket to get medicines from private sector, in Pakistan [5]. In fact, the poor availability of medicines at public sector compels the patients to buy medicines from private sector that escalates the burden on patient's pocket, while 24.3% (in 2015) of the population is living below the national poverty line [3, 4, 7, 8]. Besides, medicine prices have increased up to 100%, both legally or illegally, in the past few years [3]. The ministry of National Health Services Regulation and Coordination (NHSRC) of Pakistan has been taking different policy measures to curb these issues through Drug Regulatory Authority of Pakistan (DRAP). The first ever National Drug Pricing Policy (NDPP) was launched in 2015 for making the pricing mechanism transparent but it had minimal impact on medicine prices, suitable for both patients and manufacturers as per media reports and available literature evidences [3, 9]. So, a new drug pricing policy was launched in 2018[10]. The objectives of this policy were to improve the access to essential medicines, to devise rational prices, to ensure a transparent mechanism for pricing of medicines and to discourage illegal price increases.

Many modifications have been made to the pricing strategies in the NDPP 2018 compared to NDPP 2015, the most important one is the inclusion of all drugs (n=414) from National Essential Medicines List (NEML) under scheduled drugs category where drugs are kept under strict price control as compared to other drugs. Whereas in NDPP 2015, only 160 drugs from NEML were enlisted in this category [9, 10]. In NDPP 2018, the annual adjustment in prices has been linked with the Consumer Price Index (CPI), the Maximum Retail Prices (MRPs) of scheduled drugs (all drugs from NEML) could be increased up to 70% of the CPI, whereas the MRPs of all other drugs could be increased equivalent to CPI of the immediate preceding year. This step seems to improve the affordability of essential medicines (EMs) for patients in Pakistan. If several generics are already available in the market then in NDPP 2015, the MRP of new entrant was fixed by taking the average of other generics, while in NDPP 2018, MRP will be fixed equivalent to the highest MRP of the available generics [9, 10]. However, this would lead to even higher priced generics in the market that could compromise patient's affordability. Some media reports are claiming that the current increase (up to 200%) in medicines prices is the highest in the last 40 years, while others are claiming that government is taking action against this illegal rise in medicine prices [11, 12]. But there is no objective evidence to prove or disapprove these claims. The NDPP 2018, allows the MRPs of the New Chemical Entities (NCEs) to be fixed while using External Reference Pricing (ERP) mechanism by considering India, Bangladesh, Indonesia, Sri Lanka, Philippines, Lebanon and Malaysia as reference countries. However, the reason behind using the MRPs of these countries as reference is not clear, though some of them practice free market economy model and don't impose any price control measures over the MRPs in community pharmacies that may lead to high prices. The NDPP 2018 also takes into account the wholesale or procurement prices



1  
2  
3 from British National Formulary, Australian Pharmaceutical Benefit Scheme and New Zealand  
4 Pharmaceutical Management Agency while fixing the MRPs of NCEs, whereas these may not be  
5 the true prices because as a common practice discounts and rebates are given while making the  
6 payments. So, these ambiguities in the policy necessitate the evaluation of actual impact of these  
7 policies on the access to medicines in Pakistan.  
8  
9

10 In this context, we designed a study to measure the impact of new NDPP 2018 on access to  
11 essential medicines in terms of their prices, availability and affordability in Lahore division  
12 Punjab. We undertook a survey after the implementation of NDPP 2018 and compared it with a  
13 similar survey performed before the launch of this policy in 2017. Considering the objectives of  
14 the NDPP 2018, we hypothesized that it will improve the availability and affordability while  
15 decrease the prices of EMs.  
16  
17

## 18 **Methodology**

### 19 **Study Design**

20  
21  
22 Two cross-sectional studies were conducted in 2016-17 and 2019 using a variant of World Health  
23 Organization/Health Action International (WHO/HAI) methodology in four districts of Lahore  
24 division, Pakistan [13]. Since, the focus of this study was to measure the impact of NDPP 2018 in  
25 terms of changes in medicines prices, availability and affordability after its implementation, thus,  
26 the data on these parameters was collected to evaluate the accessibility of medicines in both years  
27 [10]. The first survey was conducted from November 2016 to March 2017, while the second survey  
28 was from March-May 2019, representing two fiscal years of Pakistan. For optimal and reliable  
29 comparison, the list of medicines, survey region and survey outlets selected for the survey 2019  
30 were similar to those selected for 2017. The details of survey region, medicine selection, sampling  
31 of medicine outlets and data collection are given elsewhere and are briefly described in this paper  
32 [7].  
33  
34  
35

### 36 **Survey Areas**

37  
38 Lahore is the largest division of Pakistan in terms of population i.e. 16.28 Million (2017) and  
39 estimated to be 19.4 Million as of 2018[14]. It consists of four districts named as Lahore, Kasur,  
40 Sheikhpura and Nankana Sahib which are further subdivided into 17 Tehsils. All the four districts  
41 were selected for the surveys.  
42  
43

### 44 **Sampling of Medicine Outlets**

45  
46 Medicine outlets or health facilities from both public and private sectors were sampled  
47 systematically using WHO/HAI manual as a guiding principle in both the surveys [13]. Total 32  
48 medicine outlets were surveyed (16 from public sector and 16 from private sector). From public  
49 sector, hospitals from all three tiers of healthcare system i.e. primary, secondary and tertiary were  
50 selected. One main hospital in each district was selected as a survey anchor along with additional  
51 three more hospitals selected randomly and situated within three hours' drive from the main  
52 hospital. In this way, 4 hospitals were selected in each district making up a total of 16 hospitals  
53 from Lahore division. From private sector, one registered pharmacy was selected situated within  
54 10 kilometers range of each public sector hospital. So, a total of 16 pharmacies were selected from  
55  
56  
57  
58  
59  
60

Lahore division, i.e. 4 retail pharmacies from each district. It is important to note that each survey unit, one hospital and one nearby pharmacy, was located in different Tehsils, so out of 17 Tehsils of Lahore division, 16 were surveyed in both years.

### **Selection of Medicines**

50 medicines were selected for survey as per WHO/HAI methodology, which included all 14 medicines from WHO core global list of medicines and 36 supplementary medicines. The criterion of selecting medicines for supplementary list was local disease burden and inclusion of medicines in NEML [15].

### **Data Collection**

The data were collected using a data collection form by the trained data collectors. The data collectors visited the health facilities and physically checked the medicines prices and availability for both OBs and LPGs of each medicine and entered in to data collection forms. The data for each year were entered separately in to the WHO/HAI workbook by using double data entry process, to avoid any mistake [13]. The patient prices or the prices charged to patients were entered in to the forms for private sector only because in public sector, the medicines are provided free of charge in Pakistan. Thus, the availability of medicines was documented only for public sector facility.

### **Data Analysis**

Data were analyzed by using WHO/HAI preprogrammed Excel workbook[13], IBM Statistical Package for the Social Sciences (SPSS) version 22.0 and R version 3.5.1 (codenamed “Feather Spray”).

*The availability* was calculated as percentage of particular medicine available at each facility on the day of data collection. The mean percentage availabilities were also calculated and compared between different sectors (public and private), product types (OBs and LPGs) and among different groups (global medicines, supplementary medicines, medicines from NEML, medicines used to treat NCDs and IDs). Availability was documented as follows; Absent: 0% of facilities had surveyed enlisted medicines at the time of survey; Low: < 50% of facilities had the surveyed enlisted medicines; Fairly high: 50 -80% of facilities had surveyed enlisted medicines; High: > 80% of facilities, survey enlisted medicines were found in most of the facilities [16, 17].

*Medicine prices* were calculated as Median Unit Prices (MUPs) in Pakistani Rupees (PKR) and were also compared with International Reference Prices (IRPs) to calculate the Median Price Ratios (MPRs). The IRPs were obtained from Management Sciences for Health (MSH) drug price indicator guide 2015[18]. An MPR of greater than 1 for public sector and greater than 2 for private sector would lodge any medicine into high priced medicines category [7]. For comparing the prices between two years, the MUPs from 2019 were deflated by 3.33%, taking 2017 as base year. 70% of the CPI was used for calculating this deflation factor, because the medicine prices can be increased annually by 70% of the CPI as per NDPP 2018 [19]. Whereas MPR was calculated as follows:

*Median Price Ratio(MPR) = Median local unit price/International reference unit price*

1  
2  
3 *Affordability* for treatment of different common diseases with selected medicines was  
4 calculated and compared in terms of Number of Days Wages (NDWs) required for a lowest paid  
5 government employee to get the standard treatment courses. Whereas, if a patient had to spend  
6 more than one day of his wage for treatment with a specific medicine in a month, that medicine  
7 was considered unaffordable [13]. For affordability comparison, NDWs in two years, the prices in  
8 2019 were not deflated because the salary has also been increased in 2019. So, the salary of the  
9 lowest paid unskilled government worker was taken as 14000PKR per month (2016-17) and  
10 15000PKR per month (2018-19) [20].  
11  
12

13  
14 *Comparative analysis:* Two patient prices were required to be included in the comparative  
15 analysis, one from 2017 and other from 2019. The difference in prices, availability and  
16 affordability were computed as percentage changes for each product. The mean availability and  
17 MUPs were also compared between different categories of medicines (NEML and non-NEML  
18 medicines; global and supplementary medicines; medicines for IDs and NCDs) across the years.  
19 We compared affordability in terms NDWs to get the standard treatment from the surveyed  
20 medicines. These were also compared among medicines for different disease groups (asthma,  
21 cardiovascular diseases, infectious diseases, brain disorders, diabetes, ulcer and arthritis; IDs and  
22 NCDs). To identify whether the difference between MUPs, MPRs and NDWs was significant  
23 across two years, we used Wilcoxon signed rank test. We took  $p < 0.01$  as an indicator of significant  
24 difference in all the statistical testing.  
25  
26  
27

## 28 **Patient and Public Involvement**

29  
30 Patients or the public were not involved in the design, or conduct, or reporting, or  
31 dissemination of this study.  
32

## 33 **Results**

### 34 **Availability of medicines**

35  
36 The overall availability of surveyed medicines was improved in 2019 when compared with 2017,  
37 except for LPGs in public sector, where it demonstrated reduction.  
38  
39

40  
41 *Availability in Public Sector:* In public sector, the availability of both OBs and LPGs was  
42 poor in both years. None of the mean availabilities touched the benchmark of 80%. The mean  
43 percent availability of OBs improved from 6.8% to 33.1% whereas, in case of LPGs it reduced  
44 from 35.1% to 9%. The individual percent availabilities of each medicine (OB and LPG) are given  
45 in table S1. For better understanding of the data, we have used the data visualization tool in R and  
46 plotted a box plot of the data as shown in figure 1. The box plot showed distributional  
47 characteristics of the percent availability of medicines in two groups (OB and LPG) for the years  
48 2017 and 2019. The mean percent availability is represented by the dot inside the box. In 2017,  
49 availabilities of 75% of the OBs in public sector were less than 11.2% as shown by the 3<sup>rd</sup> quartile  
50 or the upper bar of the 1<sup>st</sup> box plot. Whereas, in 2019, 75% of the OBs had availabilities higher  
51 than 6.3% which is almost equivalent to the mean percent availability (6.8%) in 2017. This  
52 indicates a substantial increase in the availability of OBs in public sector. In 2019, 75% of the  
53 LPGs had availability less than 12.5% (3<sup>rd</sup> quartile) whereas before the implementation of the  
54  
55  
56  
57  
58  
59  
60

NDPP 2018, 75% of the LPGs had availabilities greater than 14.3% (1<sup>st</sup> quartile). This showed a remarkable decrease in the availability of LPGs in public sector in 2019.

*Availability in private sector:* In both years, the overall availability was better in private sector than the public sector. Mean percent availability of both OBs and LPGs were improved in 2019 i.e. 55.0% to 58.3% and 20.3% to 32.3%, respectively. Availability of LPGs was less than OBs in both years. For OBs, the mean percent availability improved slightly by 3.3% while data distribution remained almost the same across the years, as shown in the box plot (figure 1). For LPGs, a substantial increase in the availability was observed in terms of mean percent availability, maximum value and change in data distribution (figure 1). In 2017, the IQR (range between upper and lower bar of the box) for percentage availability of LPGs ranged from 6% to 31% whereas it got improved in 2019 and ranged from 6% to 50%.

*Availability in different subgroups of medicines:* When we compared availability of LPGs and OBs in different subgroups of medicines as shown in table 1, we found that mean percent availabilities of all global list medicines were higher than supplementary medicines in both years. Similarly, the availability of NEML medicines were higher than non-NEML medicines except for the non-NEML LPGs in public sector, which were higher than NEML LPGs (19.2% vs 8.1%). In 2017, in public sector, the availability of OBs for NCD medicines (6.7%) were lower than OBs for ID medicines (7.7%) whereas the availability of LPGs (35.9%) were better than LPGs of ID medicines (33%). Surprisingly, in 2019, the situation inversed completely for NCD medicines, increased and decreased availability of OBs (33.2%) and LPGs (33.1%), respectively, whereas, the availability decreased for LPGs (8.8%) and increased for OBs (9.5%) for ID medicines.

**Table 1.** Mean Percent Availabilities of Originator Brands (OBs) and Lowest Price Generics (LPGs) at both public and private sectors.

|                                                | Availability in 2017<br>(Mean, SD), % |                |                |                | Availability in 2019<br>(Mean, SD), % |                |                |                | Change in mean percent<br>availability (%) |       |                |      |
|------------------------------------------------|---------------------------------------|----------------|----------------|----------------|---------------------------------------|----------------|----------------|----------------|--------------------------------------------|-------|----------------|------|
|                                                | Public Sector                         |                | Private Sector |                | Public Sector                         |                | Private Sector |                | Public Sector                              |       | Private Sector |      |
|                                                | OBs                                   | LPGs           | OBs            | LPGs           | OBs                                   | LPGs           | OBs            | LPGs           | OBs                                        | LPGs  | OBs            | LPGs |
| <b>All medicines<br/>(n=50)</b>                | 6.8<br>(10.4)                         | 35.1<br>(23.6) | 55<br>(31.1)   | 20.3<br>(14.4) | 33.1<br>(27.8)                        | 9<br>(14.9)    | 58.3<br>(32.3) | 32.3<br>(26)   | 26.3                                       | -26.1 | 3.3            | 12   |
| <b>Global<br/>Medicines<br/>(n=14)</b>         | 11.2<br>(15.2)                        | 50.1<br>(32.1) | 64.3<br>(22.5) | 25.9<br>(14.5) | 48.4<br>(31.5)                        | 14.3<br>(19.9) | 66.5<br>(31.2) | 43.8<br>(27.8) | 37.2                                       | -35.8 | 2.2            | 17.9 |
| <b>Supplementar<br/>y medicines<br/>(n=36)</b> | 5<br>(7.0)                            | 29.2<br>(21.4) | 51.4<br>(33)   | 18.1<br>(14)   | 27.2<br>(24.1)                        | 7<br>(12.1)    | 55<br>(32.6)   | 27.8<br>(24.1) | 22.2                                       | -22.3 | 3.6            | 9.7  |
| <b>NEML<br/>medicines<br/>(n=46)</b>           | 7.2<br>(10.7)                         | 35.5<br>(26)   | 55.3<br>(31)   | 20.7<br>(14.6) | 33.9<br>(28.1)                        | 8.1<br>(15.1)  | 58.4<br>(32.9) | 33.3<br>(26.3) | 26.7                                       | -27   | 3.1            | 12.6 |
| <b>Non-NEML<br/>medicines<br/>(n=4)</b>        | 1.8<br>(3.0)                          | 35.5<br>(34)   | 51.6<br>(36)   | 15.6<br>(11)   | 24.8<br>(25)                          | 19.2<br>(7)    | 56.3<br>(28)   | 20.3<br>(21)   | 23                                         | -16   | 4.7            | 4.7  |

|                             |               |                |                |              |                |               |                |                |      |       |      |      |
|-----------------------------|---------------|----------------|----------------|--------------|----------------|---------------|----------------|----------------|------|-------|------|------|
| <b>NCD medicines (n=36)</b> | 6.4<br>(9.2)  | 35.9<br>(25.5) | 55.7<br>(28.8) | 20<br>(14.3) | 33.2<br>(27)   | 8.8<br>(14)   | 62.3<br>(29.3) | 31.3<br>(25)   | 26.8 | -27.1 | 6.6  | 11.1 |
| <b>ID medicines (n=14)</b>  | 7.7<br>(13.3) | 33<br>(29)     | 53.1<br>(37.3) | 21<br>(15)   | 33.1<br>(30.5) | 9.5<br>(17.4) | 47.8<br>(38.1) | 34.8<br>(29.2) | 25.4 | -23.5 | -5.3 | 13.8 |

*Availability at different levels of healthcare:* When we compared the availability at different levels of public healthcare sectors i.e. primary, secondary and tertiary, the availability of OBs improved in 2019, while it was decreased for LPGs. The pattern of overall medicines availability remained almost the same as of 2017 i.e. tertiary care>secondary care>primary care as shown in table S2.

### Medicine Prices

An overall increase was noted in all adjusted MUPs and adjusted MPRs between 2017 and 2019 for both OBs and LPGs as shown in Table 2. In 2019, for all 42 available OBs, the adjusted MUPs and MPRs significantly increased by a median of 4.3% (Wilcoxon test  $p=0.001$ ,  $p=0.0001$ ). Whereas in case of all 37 available LPGs, the adjusted MUPs and MPRs were increased by a median of 15.7% ( $p=0.002$ ,  $p=0.0002$ ). The MPRs of OBs ranged from 0.58 to 60.62 in 2017 and 0.73 to 77.59 in 2019. 63% of the OBs had MPR of more than 2 in 2017. Whereas, in 2019 almost 75% of the OBs had MPR greater than 2. The MPRs of LPGs ranged from 0.42 to 19.95 in 2017 and 0.39 to 19.89 in 2019. For LPGs in 2017, the median value of MPR was less than 2 (i.e. 1.36) while in 2019 this median value became greater than 2 (i.e. 2.26). Which means many LPGs which were previously affordable got shifted to the high priced medicines category in 2019. The MUPs and MPRs for all OBs is given in table S3 and for all LPGs is given in table S4.

**Table 2.** Median price ratios (MPRs) and median unit prices (MUPs) of originator brands (OBs) and lowest price generics (LPGs) in private sector among different subgroups across the years 2017 and 2019.

|                                | Originator Brands (OBs) |          |                |                         |                                   |
|--------------------------------|-------------------------|----------|----------------|-------------------------|-----------------------------------|
|                                | MPR-2017                | MPR-2019 | MUP 2017 (PKR) | Adjusted MUP 2019 (PKR) | Median percent change in MUPs/MPR |
| All medicines (n=42)           | 2.5                     | 3.2      | 6.99           | 8.49                    | 4.29%                             |
| Global Medicines (n=13)        | 2.8                     | 3.2      | 7.66           | 8.22                    | 3.35%                             |
| Supplementary medicines (n=29) | 2.5                     | 3.3      | 6.38           | 10.1                    | 5.1%                              |
| NEML medicines (n=39)          | 2.4                     | 3.3      | 6.38           | 8.51                    | 5.1%                              |
| Non-NEML medicines (n=3)       | 3                       | 3.2      | 7.66           | 8.22                    | 1.93%                             |
| NCD medicines (n=36)           | 2.6                     | 3.3      | 6.19           | 7.83                    | 3.35%                             |
| CD medicines                   | 2.3                     | 2.9      | 24.3           | 31.2                    | 7.36%                             |

| (n=10)                            |              |              |                      |                               |                                        |
|-----------------------------------|--------------|--------------|----------------------|-------------------------------|----------------------------------------|
| Lowest Price Generics (LPGs)      |              |              |                      |                               |                                        |
|                                   | MPR-<br>2017 | MPR-<br>2019 | MUP<br>2017<br>(PKR) | Adjusted<br>MUP<br>2019 (PKR) | Median<br>percent change<br>in MPR/MUP |
| All medicines<br>(n=37)           | 1.4          | 2.3          | 5.8                  | 6.29                          | 15.7%                                  |
| Global<br>Medicines<br>(n=13)     | 1.6          | 2.7          | 5.8                  | 6.56                          | 19.2%                                  |
| Supplementary medicines<br>(n=24) | 1.3          | 2.2          | 5.9                  | 6.04                          | 14.8%                                  |
| NEML medicines<br>(n=34)          | 1.4          | 2.2          | 5.4                  | 6                             | 15.8%                                  |
| Non-NEML medicines<br>(n=3)       | 2.5          | 2.7          | 6.5                  | 6.7                           | 3.97%                                  |
| NCD medicines<br>(n=26)           | 1.2          | 2.2          | 4.1                  | 5.4                           | 16.3%                                  |
| CD medicines<br>(n=11)            | 1.8          | 2.4          | 8.4                  | 10.9                          | 14.8%                                  |

The price data was also analyzed in different subgroups as shown in table 2. There was an increase in MUPs and MPRs for OBs of supplementary list of medicines compared to medicines from global list (5.5% vs 3.35%). However, it was inverse in case of LPGs, i.e. the prices of global medicines increased compared to supplementary medicines (19.2% vs 14.8%). Increment in prices of NEML medicines was more as compared to non-NEML medicines. Next, we compared medicines used for NCDs and IDs. Data suggested that the increase in the MUPs and MPRs of OBs for IDs was significant in comparison to NCDs (11.2% vs 7.36%). Whereas it was the opposite case for LPGs, where the increase was greater for NCD than ID medicines (16.3% vs 14.8%). It is also noteworthy that increase in prices for LPGs is more significant than OBs for all subgroups of medicines.

### Affordability

Between 2017 and 2019, the median NDWs required for treatment with all OBs (n=36) increased from 1.05 to 2 and 0.5 to 0.7 for all LPGs (n=31), respectively. In 2019, the median percent increase in NDWs for LPGs (n=31) was much higher as compared to OBs (n=36) i.e. 12.5% (p=0.008) and 3% (p=0.081) respectively. So, an overall increase in NDWs for both OBs and LPGs was observed between 2017 and 2019. Similarly the Median Treatment Prices (MTPs) for OB and LPGs also increased significantly i.e. 464 PKR to 563 PKR (p<0.001) and 244 PKR to 350 PKR (p<0.001), respectively. The MTPs and NDWs for each medicine are given in tables S5 and S6. The medicines were categorized into seven disease groups to further analyze the changes in affordability between 2017 and 2019. In figure 2, a bar graph shows Median NDWs required for both OBs and LPGs in each disease group and the values above 1 are considered unaffordable. In 2017, the median NDWs of OBs to treat three types of diseases i.e. CVDs (1.2), diabetes (1.4) and ulcers (2.75) were more than 1. Whereas in 2019, medicines for one more

1  
2  
3 disease category made its place into this list i.e. the medicines for IDs (1.18). Compared to 2017,  
4 the median NDWs for all OBs increased in 2019 except for OBs acting on Central Nervous System  
5 (CNS) and OBs to treat ulcers. The treatment for ulcer remained highly unaffordable in both years.  
6 The median NDWs for LPGs increased in 2019 for the treatment of Arthritis, CNS disorders,  
7 CVDs and IDs, while the modest decrease in median NDWs for LPGs was observed for some  
8 diseases i.e. asthma, diabetes and ulcers as shown in figure 2.  
9  
10  
11  
12

## 13 Discussion

14  
15 This study gives a conscionable insight in to the effects of NDPP 2018 associated changes on  
16 medicine prices, availability and affordability in both public and private healthcare sectors of  
17 Lahore division, Pakistan. The main objective of this refined policy was to improve the access to  
18 essential medicines (EMs) and improvise rational drug pricing. Our study has shown that the  
19 overall availability of medicines improved in 2019 in comparison to 2017 i.e. before the  
20 implementation of this policy, except for the LPGs in public sector, demonstrating reduction.  
21 Overall the medicine prices were increased significantly, making majority of the EMs used for the  
22 common ailments unaffordable, with much higher price increases for LPGs in comparison to OBs.  
23 The medicines used to treat ulcer, diabetes and CVDs remained most unaffordable in both years.  
24 Thus, it can fairly be assumed that the current pricing policy, to some extent, ensures the  
25 availability of medicines, nonetheless, significant policy refinements targeting essential medicines  
26 are pivotal to make medicine prices affordable to patients. Although, this study provides an  
27 objective evidence to the policy makers for improving the current pricing policies. Our study has  
28 some limitations as well. The study includes medicines with specific strengths and dosage forms  
29 to compare with IRPs. There might be other strengths/dosage forms of the surveyed medicines,  
30 available in the health facilities, so the availability of the medicines may be under estimated.  
31 Moreover, the affordability was calculated for single medicine for each disease, whereas patients  
32 are usually taking more than one drug at a time – under-estimating the extent of affordability of a  
33 specific treatment for a specific disease.  
34  
35  
36  
37  
38  
39

40 Despite improvements in the availability of medicines between 2017 and 2019, the  
41 availability of medicine remained below the optimal benchmark of 80% [13]. In public sector the  
42 availability of OBs improved remarkably probably be due to decentralization procurement of  
43 medicines in public sector. Before 2018, the medicines were procured centrally for all the public  
44 sector hospitals except for teaching hospitals, within a province. But after 2018, the medicines  
45 procurement was decentralized for public sector hospital to allow hospitals in each district a free  
46 choice to select desired manufactures, thus, ending up in the selection of more OBs than LPGs,  
47 possibly due to quality concerns about medicines. Another factor that improved medicines  
48 availability after 2018 was authorization of hospitals to acquire medicines directly without any  
49 delays. However, as practiced in the previous central supply system, the medicines were received  
50 centrally from the manufacturers before reaching the concerned hospital with considerable effect  
51 on timely availability of medicines. In both years, the mean percentage availabilities for all  
52 medicines were found higher in the private sector compared to the public sector, corroborating  
53 similar previous studies conducted in Bangladesh and Malawi in 2019 [21, 22]. The overall  
54  
55  
56  
57  
58  
59  
60

1  
2  
3 availability of medicines from NEML was slightly better than non-NEML medicines in both public  
4 and private sectors. This might be attributed to the active role of DRAP in the revision and  
5 subsequent dissemination of the revised NEML i.e. NEML 2018 [15]. Furthermore, the public  
6 hospitals are encouraged to procure drugs from the latest NEML 2018 that has been standardized  
7 in line with WHO essential medicines model list 2017 [23]. Besides, a mobile application was  
8 launched in 2018 with user friendly interface to better disseminate the information on enlisted  
9 medicines [24]. So, the NDPP 2018, doesn't seem to be solely responsible for the availability of  
10 medicines.  
11  
12

13  
14 Although we found some improvements in the availability of medicines, there was a  
15 substantial increase in medicine prices, making them inaccessible for most of the population.  
16 According to one estimate approximately 46 million people are living below the national poverty  
17 line in Pakistan (as per 2015) [8]. The increases in prices of both OBs and LPGs may fairly be  
18 attributable to the NDPP 2018, that allows an annual increase in the prices of scheduled drugs up  
19 to 70% of CPI compared to 50% of CPI as per NDPP 2015 [9, 10]. These changes in price  
20 calculations seems to accentuate the substantial impact on overall prices of medicines, thus,  
21 making them more expensive. The increase in LPGs prices were more significant as compared to  
22 OBs suggesting that with already expensive OBs, the price increase in LPGs would impoverish  
23 the overall access to medicines, imputable to the changes in formula for LPGs (new entrants) price  
24 calculation. According to NDPP 2018, the MRP of new entrant first generic should be fixed at  
25 20% less than that of OB compared with 30% less than MRP of OB as per NDPP 2015. Another  
26 possible variable is the prior availability of generics in the market for price calculation, where,  
27 according to NDPP2018, the MRP of a new entrant (LPGs) was fixed equal to the highest MRP  
28 of the available generics in the market, while as per NDPP2015 practice, MRP was fixed by taking  
29 the average of other generics in the market. Therefore, these changes in price calculating  
30 mechanisms might have led to higher prices of many new LPGs in the market. Hence, contrary to  
31 NDPP 2018's price steerage objectives, the increase in medicine prices was more distinct for  
32 NEML medicines as compared to non-NEML medicines.  
33  
34  
35  
36  
37

38 Data from further analysis on affordability of standard treatment by selected OBs and LPGs  
39 suggested that majority of the medicines have become more unaffordable in 2019. When the  
40 affordability was compared for medicines of different disease groups, the three top most  
41 unaffordable OBs were found for the treatment of ulcers, diabetes and CVDs. Additionally, the  
42 treatment for ulcers remained awfully unaffordable with OBs and LPGs in both years.  
43 Nevertheless, the treatment of CVDs and diabetes with LPGs remained affordable in 2017 but the  
44 NDWs for CVDs surpassed affordability threshold in 2019. Among the disease categories, NCDs  
45 harbor the top three unaffordable slots. It is noteworthy, that the burden of NCDs is increasing  
46 worldwide and is responsible for higher mortality rates than all other diseases combined [25-27].  
47 The CVDs, diabetes, cancer and chronic respiratory diseases are responsible for about 80% of  
48 these deaths [28]. Pakistan is among top 10 countries where prevalence of diabetes is very high.  
49 Besides, one third of Pakistanis, above 45 years of age have hypertension [29-31]. Thus, the  
50 unaffordability of the essential medicines for NCDs, such as CVDs and diabetes, has worse bearing  
51 on affordability associated therapeutic outcomes that ultimately leads to increased morbidity and  
52 mortality due to un-controlled disease.  
53  
54  
55  
56  
57  
58  
59



1  
2  
3  
4  
5  
6  
7  
8  
9  
10  
11  
12  
13  
14  
15  
16  
17  
18

Additionally, we also compared the median drug prices in 2019 with the prices published/allowed by DRAP in its latest Statutory Regulatory Orders (SROs). DRAP revised and published the maximum retail prices (MRPs) of about 1084 drugs on December 31, 2018 through SRO-1608, SRO-1609 and SRO-1610 [32]. Eighteen OBs from our study sample were part of these price revisions (table 3). Surprisingly, after comparing the MUPs of 18 selected OBs with prices allowed by the government, we found that most of the OBs, 14 out of 18, were sold at higher prices than the allowable prices – with median percent increase of 29.37%. These data suggested that these intentional malpractices by the drug sellers might be driven by poor price control regulation by price enforcement authorities. Therefore, the current drug pricing policy NDPP 2018, is not the sole reason of price hike, probably main stakeholders in drug supply chain are also contributing towards medicine inflated prices. Thus, it's reasonable to deduce that these factors may interfere with measuring the direct impact of current pricing policy.

19  
20

**Table 3.** Maximum retail unit prices (MRPs) of Originator Brands (OBs) allowed by the government versus median unit prices (MUPs) found in private sector pharmacies.

21  
22  
23  
24  
25  
26  
27  
28  
29  
30  
31  
32  
33  
34  
35  
36  
37  
38  
39  
40  
41  
42  
43  
44  
45  
46  
47  
48  
49  
50

| Medicine Name            | Strength (Dosage form) | Allowed Unit Price (PKR) | MUP 2019 (PKR) | Percentage difference |
|--------------------------|------------------------|--------------------------|----------------|-----------------------|
| Aciclovir                | 200mg (tab)            | 52.6                     | 75             | 42.5%                 |
| Amlodipine               | 5mg (tab)              | 8.5                      | 13             | 52.9%                 |
| Amoxicillin              | 250mg (cap)            | 3.75                     | 3.75           | 0%                    |
| Amoxicillin              | 500mg (cap)            | 5.58                     | 8.75           | 56.8%                 |
| Atorvastatin             | 20mg (cap)             | 141.37                   | 203.5          | 43.9%                 |
| Bisoprolol               | 5mg (tab)              | 15.35                    | 16.72          | 8.9%                  |
| Carbamezipine            | 200mg (tab)            | 4                        | 5              | 25%                   |
| Ceftriaxone              | 1g (inj)               | 783                      | 783            | 0%                    |
| Ciprofloxacin            | 500mg (tab)            | 39.25                    | 52.5           | 33.7%                 |
| Digoxin                  | 0.25mg (tab)           | 1.75                     | 2.68           | 53.1%                 |
| Fluconazole              | 200mg (cap)            | 425                      | 585            | 37.6%                 |
| Insulin N                | 100IU (vial)           | 88.47                    | 75.88          | -14.2%                |
| Insulin R                | 100IU (vial)           | 93.88                    | 75.88          | -19.1%                |
| Methyldopa               | 250mg (tab)            | 7.71                     | 8.1            | 5.05%                 |
| Omeprazole               | 20mg (cap)             | 42.9                     | 52.29          | 21.8%                 |
| Propranolol              | 40mg (tab)             | 1.1                      | 3.16           | 187.2%                |
| Pyremethamine+Sulfadoxim | (25+500)mg (tab)       | 12.01                    | 12.02          | 0.08%                 |
| Simvastatin              | 20mg (cap)             | 47.01                    | 68             | 44.6%                 |
| Medians                  |                        | 27.3                     | 34.505         | 29.3%                 |

51  
52  
53  
54  
55  
56  
57  
58  
59  
60

There could be many policy implications having an impact on drug pricing, availability and affordability. The procurement of medicines should be strictly based on the NEML. Clear cut mechanism for NEML based procurement should be devised and implemented specially in the

public sector hospitals. Besides this, the hospital pharmacy and therapeutics committees must actively evaluate the safety, efficacy and cost-effectiveness of drugs before purchasing. Pharmacoeconomic evaluations of drugs must be promoted by allocating research funds to experts. Not all drugs should be fully reimbursed in the hospitals, only essential medicines must be included in this list. So, the profits from other drugs can be used to purchase essential drugs when needed. Smooth functioning of the drug supply chain with proper quality control must be ensured. The current inflated prices would have a grave impact on the access to essential medicines, especially for the lower and middle income population in Pakistan. Thus, there is dire need to develop more clear, evidence based and stringent price control policy, especially for essential medicines. Exempting or reducing taxes and tariffs on EMs and promotion of local generic manufacture by providing subsidies on raw materials may improve both the availability and affordability of these medicines. While using the External Reference Pricing (ERP) mechanism, the reference countries should be chosen critically e.g. countries with similar pharmaceutical market and economic status. For costly medicines, regressive markups must be encouraged over progressive markups. The drug prices must be monitored on regular basis using a validated and well-designed scientific methodology and pricing policy must be revised based on such evidences. The essential medicines for most prevalent diseases such as diabetes and CVDs must be preferentially made affordable by devising some specific pricing strategies for these medicines. Besides, efforts must be made to enforce the pricing policy effectively by introducing reward and punishment system to induce a healthy competition among the drug manufacturers and sellers.

In Conclusion, the availability of medicines has been improved after the launch of a new drug pricing policy by Pakistani government but it is still poor, forcing the patients to buy medicines from private sector at their own expense. The prices of both LPGs and OBs of EMs have increased remarkably in 2019, when compared with 2017. The medicines to treat most prevalent non-communicable diseases (diabetes and CVDs) have become more expensive and unaffordable. The maximum retail prices of several originator brands have been illegally increased in the market, adding more burden on patients' pockets. The pricing policy needs to be improved further to bring a strict price control, especially on the EMs and on the medicines for most prevalent diseases.

## Acknowledgements

We are thankful to Dr. Margaret Ewen, Senior projects manager, medicine prices at Health Action International (HAI), for helping us in designing the study. We would like to acknowledge the pharmacists from surveyed institutions, data collectors and partners from research area who made this research possible.

## Contributions

AS, ZB and YF conceptualize the study. ZA, HS, AS and ZB designed methodology. ZS, HS, AS trained the data collectors and obtained the data. YF provided resources and supervised the project. ZS worked as survey area manager. MA, AH, NA, FK and MZ did data cleaning, validation and entry. AS, HS, CY, MJ analyzed the data. AS and HS wrote original draft. YF, ZB, ZS, CY and MJ, WJ reviewed and edited the manuscript.

**Funding** This work was funded by the “Young Talent Support Plan”, “High Achiever Plan” of Health Science Center, Xi’an Jiaotong University, and the Central University Basic Research Fund (2015qngz05).

### **Competing Interests**

None

### **Patient Consent for Publication**

Not Required

### **Ethics Approval**

Ethics approval was obtained from the Medical Ethics Committee of Xi’an Jiaotong University under study ID 2019-067.

### **Data availability statement**

Data are available on reasonable request.

## **References**

1. United Nations Development Group, United Nations. Statistical Division. Indicators for monitoring the millennium development goals: definitions, rationale, concepts and sources. United Nations Publications 2003:95.
2. World Health Organization. Medicine prices and access to medicines in the Eastern Mediterranean Region. 2007.
3. Lee KS, Shahidullah A, Zaidi ST, *et al*. The Crux of the Medicine Prices' Controversy in Pakistan. *Frontiers in pharmacology* 2017;8:504.
4. Kiani A, Qadeer A, Mirza Z, *et al*. Prices, availability and affordability of medicines in Pakistan. Geneva: Health Action International (HAI); 2006.
5. Zaidi S, Bigdeli M, Aleem N, *et al*. Access to essential medicines in Pakistan: policy and health systems research concerns. *PloS One* 2013;8:e63515.
6. Cameron A, Ewen M, Ross-Degnan D, *et al*. Medicine prices, availability, and affordability in 36 developing and middle-income countries: a secondary analysis. *The Lancet* 2009;373:240.

- 1
  - 2
  - 3
  - 4
  - 5
  - 6
  - 7
  - 8
  - 9
  - 10
  - 11
  - 12
  - 13
  - 14
  - 15
  - 16
  - 17
  - 18
  - 19
  - 20
  - 21
  - 22
  - 23
  - 24
  - 25
  - 26
  - 27
  - 28
  - 29
  - 30
  - 31
  - 32
  - 33
  - 34
  - 35
  - 36
  - 37
  - 38
  - 39
  - 40
  - 41
  - 42
  - 43
  - 44
  - 45
  - 46
  - 47
  - 48
  - 49
  - 50
  - 51
  - 52
  - 53
  - 54
  - 55
  - 56
  - 57
  - 58
  - 59
  - 60
7. Saeed A, Saeed H, Saleem Z, *et al.* Evaluation of prices, availability and affordability of essential medicines in Lahore Division, Pakistan: A cross-sectional survey using WHO/HAI methodology. *PloS One* 2019;14:e0216122.
8. The World Bank. Poverty and Equity data portal. 2015. Available: <http://povertydata.worldbank.org/poverty/country/PAK>. [Accessed: 16 June 2019].
9. Costing and Pricing Division, Drug Regulatory Authority of Pakistan. Drug Pricing Policy 2015.
10. Costing and Pricing Division, Drug Regulatory Authority of Pakistan. Drug Pricing Policy 2018.
11. Durrani F. Increase in drug prices highest in last 40 years. *The News* 2019. Available: <https://www.thenews.com.pk/print/454864-increase-in-drug-prices-highest-in-last-40-years>. [Accessed: 3 September 2019].
12. Junaidi I. Minister orders crackdown on firms increasing medicine prices. *DAWN News* 2019. Available: <https://www.dawn.com/news/1473573>. [Accessed: 3 September 2019].
13. World Health Organization. Measuring medicine prices, availability, affordability and price components 2008.
14. Pakistan Bureau of Statistics. Population Census. 2017. Available: <http://www.pbs.gov.pk/content/population-census>. [Accessed: 18 August 2019].
15. Drug Regulatory Authority of Pakistan. National Essential Medicines List. 2018.
16. Yang H, Dib HH, Zhu M, *et al.* Prices, availability and affordability of essential medicines in rural areas of Hubei Province, China. *Health policy and planning* 2009;25:219.
17. Fang Y, Wagner AK, Yang S, *et al.* Access to affordable medicines after health reform: evidence from two cross-sectional surveys in Shaanxi Province, western China. *The Lancet Global Health* 2013;1:e227.
18. Management Sciences for Health. International Medical Products Price Guide 2015.
19. Pakistan Bureau of Statistics, Government of Pakistan. Price Statistics. Available: <http://www.pbs.gov.pk/content/officially-published-consumer-prices-data-imf-template>. [Accessed 18 August 2019].

- 1
  - 2
  - 3
  - 4
  - 5
  - 6
  - 7
  - 8
  - 9
  - 10
  - 11
  - 12
  - 13
  - 14
  - 15
  - 16
  - 17
  - 18
  - 19
  - 20
  - 21
  - 22
  - 23
  - 24
  - 25
  - 26
  - 27
  - 28
  - 29
  - 30
  - 31
  - 32
  - 33
  - 34
  - 35
  - 36
  - 37
  - 38
  - 39
  - 40
  - 41
  - 42
  - 43
  - 44
  - 45
  - 46
  - 47
  - 48
  - 49
  - 50
  - 51
  - 52
  - 53
  - 54
  - 55
  - 56
  - 57
  - 58
  - 59
  - 60
20. Wage Indicator Foundation. Minimum wages in Pakistan 2018. Available: <https://wageindicator.org/Wageindicatorfoundation>. [Accessed 15 April 2019].
21. Kasonde L, Tordrup D, Naheed A, *et al.* Evaluating medicine prices, availability and affordability in Bangladesh using World Health Organisation and Health Action International methodology. *BMC health services research* 2019;19:383.
22. Khuluza F, Haeefele-Abah C. The availability, prices and affordability of essential medicines in Malawi: A cross-sectional study. *PloS One* 2019;14:e0212125.
23. Jabri P. National essential medicine list -2018 to be implemented in all provinces: Kiani. *Business Recorder* 2018. Available: <https://www.brecorder.com/2018/10/06/444080/national-essential-medicine-list-2018-to-be-implemented-in-all-provinces-kiani/>. [Accessed: 3 September 2019].
24. Govt. launches WHO backed national essential medicine list. *Pakistan Today* 2018. Available: <https://www.pakistantoday.com.pk/2018/10/05/govt-launches-who-backed-national-essential-medicine-list/>. [Accessed: 3 September 2019].
25. Dans A, Ng N, Varghese C, *et al.* The rise of chronic non-communicable diseases in southeast Asia: time for action. *The Lancet* 2011;377:680.
26. Siegel KR, Patel SA, Ali MK. Non-communicable diseases in South Asia: contemporary perspectives. *British medical bulletin* 2014;111:31.
27. Habib SH, Saha S. Burden of non-communicable disease: global overview. *Diabetes & Metabolic Syndrome: Clinical Research & Reviews* 2010;4:41.
28. World Health Organization. Global action plan for the prevention and control of non-communicable diseases 2013-2020, 2013.
29. Ghaffar A, Reddy KS, Singhi M. Burden of non-communicable diseases in South Asia. *BMJ* 2004;328:807.
30. Jafar TH, Haaland BA, Rahman A, *et al.* Non-communicable diseases and injuries in Pakistan: strategic priorities. *The Lancet* 2013;381:2281.
31. Wasay M, Zaidi S, Jooma R. Non communicable diseases in Pakistan: burden, challenges and way forward for health care authorities. *Journal of Pakistan Medical Association* 2014; 64:1218.
32. Drug Regulatory Authority of Pakistan. SRO: Pricing division 2018. Available: <https://www.dra.gov.pk/Home/Pricing>. [Accessed: 17 July 2019].

1  
2  
3  
4  
5  
6  
7  
8  
9  
10  
11 **Figure 1. Box plot of percent availability of lowest price generics (LPGs) and originator**  
12 **brands (OBs) in both public (pub) and private (pvt) sectors in 2017 and 2019.** This box plot  
13 shows the distributional characteristics of the percent availability of medicines in two groups (OB  
14 and LPG) for the years 2017 and 2019. The mean percent availability is represented by the dot  
15 inside the box.  
16  
17

18 **Figure 2.** Bar graph of affordability of originator brands (OBs) and lowest price generics (LPGs)  
19 for different diseases in both years i.e. 2017 and 2019.  
20  
21  
22  
23  
24  
25  
26  
27  
28  
29  
30  
31  
32  
33  
34  
35  
36  
37  
38  
39  
40  
41  
42  
43  
44  
45  
46  
47  
48  
49  
50  
51  
52  
53  
54  
55  
56  
57  
58  
59  
60

1  
2  
3  
4  
5  
6  
7  
8  
9  
10  
11  
12  
13  
14  
15  
16  
17  
18  
19  
20  
21  
22  
23  
24  
25  
26  
27  
28  
29  
30  
31  
32  
33  
34  
35  
36  
37  
38  
39  
40  
41  
42  
43  
44  
45  
46  
47  
48  
49  
50  
51  
52  
53  
54  
55  
56  
57  
58  
59  
60

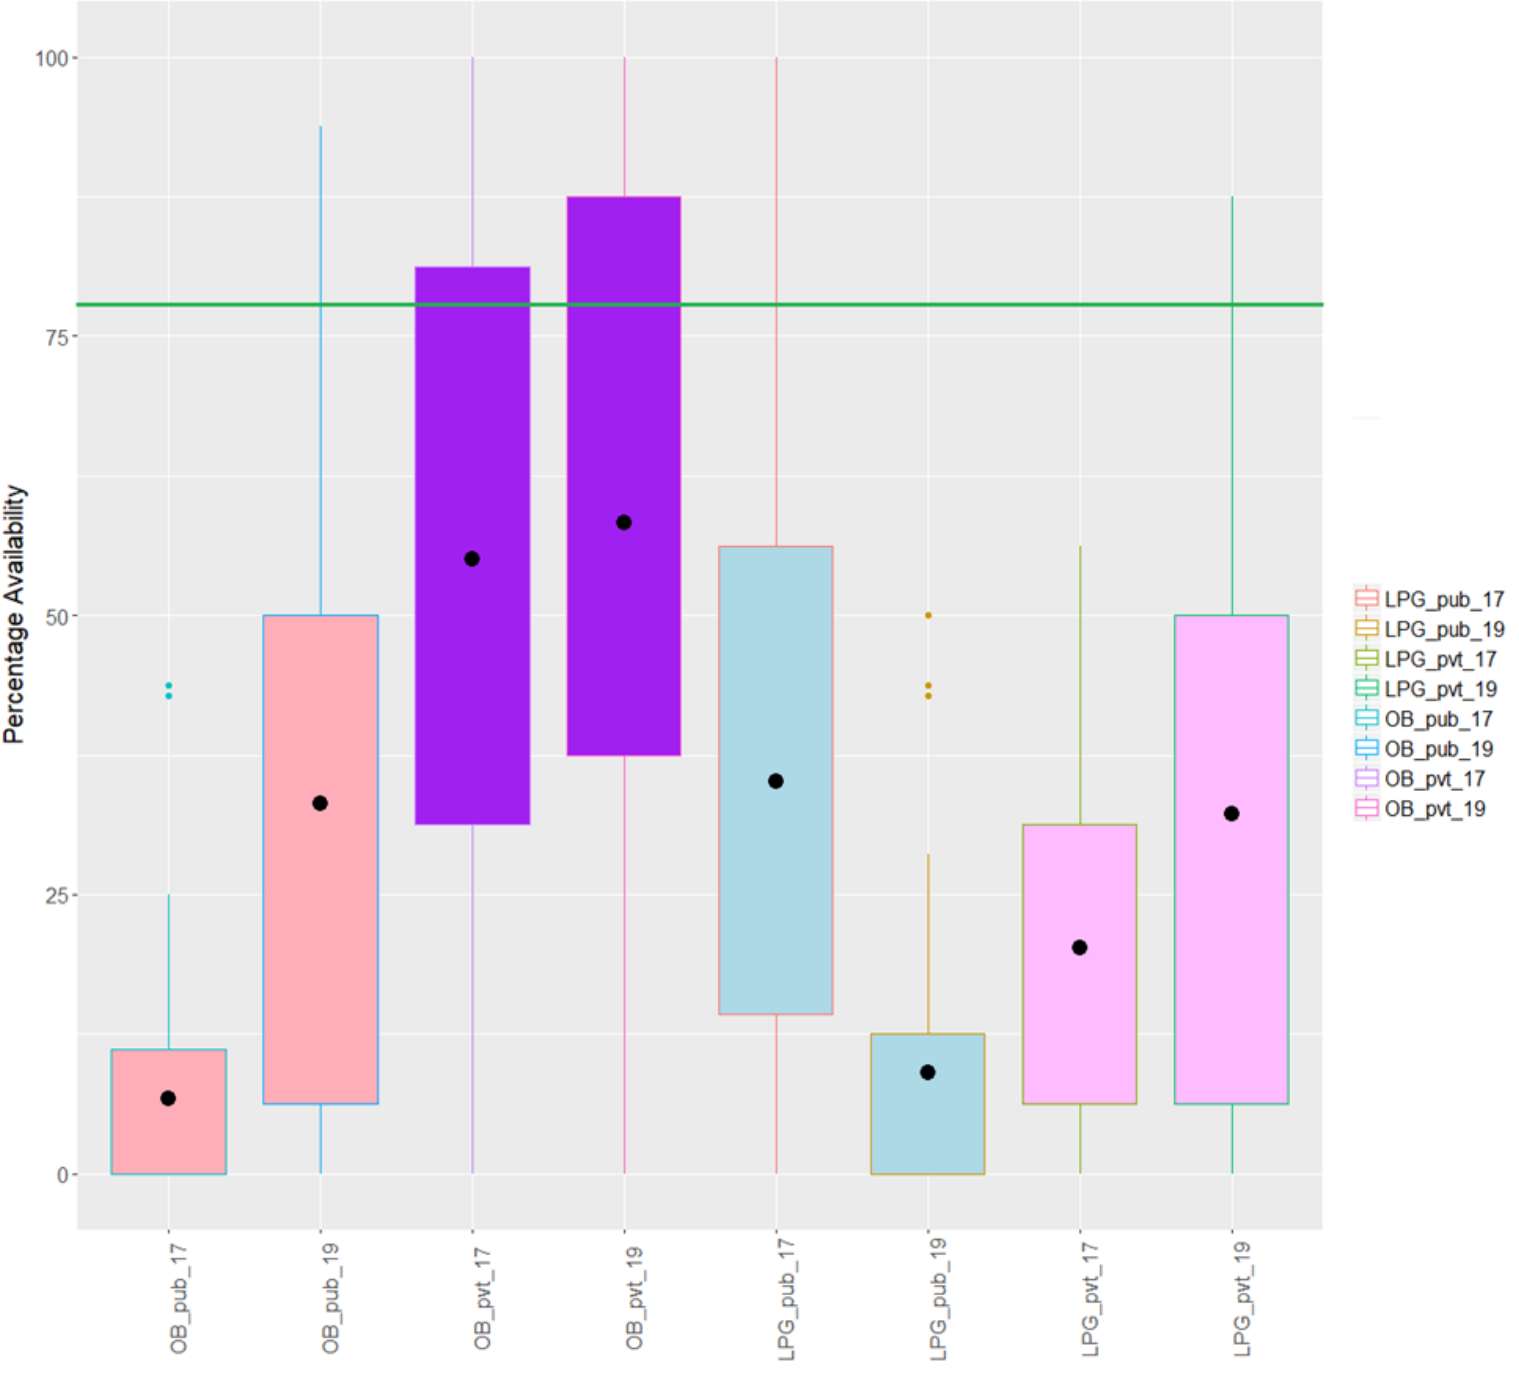

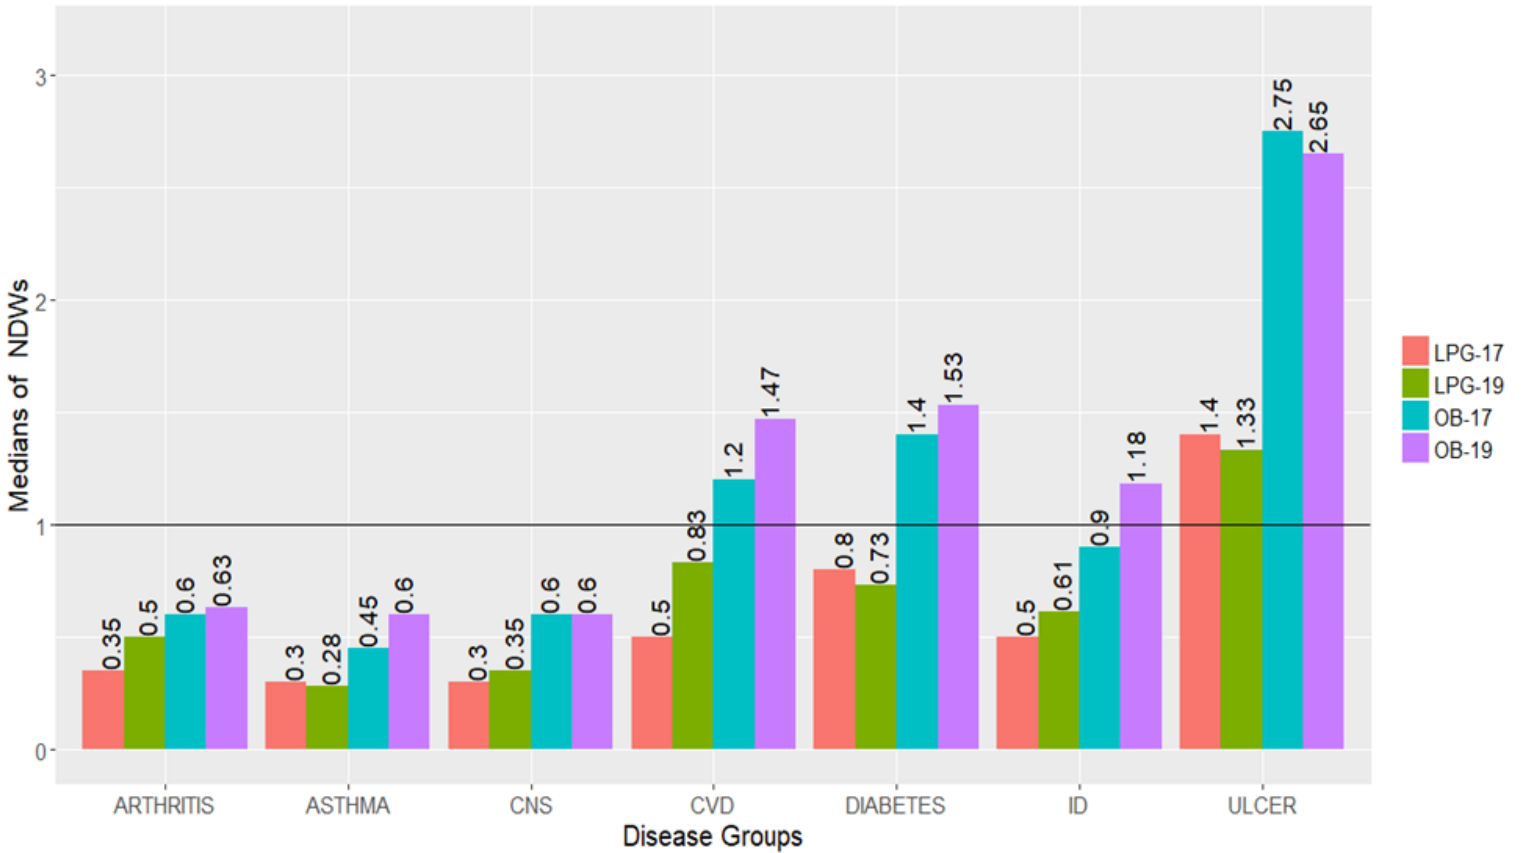



## Supplementary Tables

**Table S1.** Percent availabilities and of originator brands (OBs) and lowest price generics (LPGs) of all medicines in public and private sector in 2017 and 2019 (%)

| Names of meds                     | OB<br>(Public)<br>2017 | OB<br>(Pvt.)<br>2017 | LPG<br>(Public<br>) 2017 | LPG<br>(Pvt.)<br>2017 | OB<br>(Public<br>) 2019 | OB<br>(Pvt)<br>2019 | LPG<br>(Public<br>) 2019 | LPG<br>(pvt.)<br>2019 |
|-----------------------------------|------------------------|----------------------|--------------------------|-----------------------|-------------------------|---------------------|--------------------------|-----------------------|
| Acetylsalicylic Acid              | 0.0                    | 25.0                 | 56.3                     | 25.0                  | 18.8                    | 75.0                | 50.0                     | 18.8                  |
| Aciclovir                         | 0.0                    | 50.0                 | 25.0                     | 37.5                  | 6.3                     | 18.8                | 0.0                      | 50.0                  |
| Amiodarone                        | 7.1                    | 62.5                 | 21.4                     | 6.3                   | 0.0                     | 62.5                | 21.4                     | 0.0                   |
| Amitriptyline                     | 0.0                    | 31.3                 | 0.0                      | 25.0                  | 0.0                     | 0.0                 | 50.0                     | 50.0                  |
| Amlodipine                        | 6.3                    | 75.0                 | 62.5                     | 31.3                  | 37.5                    | 93.8                | 12.5                     | 56.3                  |
| Amoxicillin                       | 43.8                   | 93.8                 | 18.8                     | 25.0                  | 93.8                    | 68.8                | 0.0                      | 37.5                  |
| Amoxicillin (250)                 | 18.8                   | 100.0                | 12.5                     | 31.3                  | 50.0                    | 87.5                | 0.0                      | 37.5                  |
| Atenolol                          | 12.5                   | 87.5                 | 81.3                     | 43.8                  | 43.8                    | 81.3                | 0.0                      | 56.3                  |
| Atorvastatin                      | 7.1                    | 50.0                 | 21.4                     | 25.0                  | 42.9                    | 62.5                | 21.4                     | 18.8                  |
| Azithromycin                      | 0.0                    | 25.0                 | 25.0                     | 31.3                  | 31.3                    | 25.0                | 25.0                     | 75.0                  |
| Beclometasone inhaler             | 0.0                    | 6.3                  | 35.7                     | 12.5                  | 35.7                    | 43.8                | 0.0                      | 0.0                   |
| Bisoprolol                        | 6.3                    | 87.5                 | 18.8                     | 25.0                  | 37.5                    | 81.3                | 0.0                      | 56.3                  |
| Captopril                         | 0.0                    | 81.3                 | 85.7                     | 25.0                  | 50.0                    | 93.8                | 28.6                     | 50.0                  |
| Carbamazepine                     | 12.5                   | 87.5                 | 56.3                     | 25.0                  | 25.0                    | 31.3                | 0.0                      | 56.3                  |
| Ceftriaxone injection             | 14.3                   | 68.8                 | 71.4                     | 31.3                  | 21.4                    | 75.0                | 50.0                     | 87.5                  |
| Ciprofloxacin                     | 0.0                    | 81.3                 | 100.0                    | 37.5                  | 64.3                    | 93.8                | 14.3                     | 25.0                  |
| Clarithromycin                    | 0.0                    | 87.5                 | 35.7                     | 25.0                  | 50.0                    | 93.8                | 0.0                      | 56.3                  |
| Co-trimoxazole suspension         | 6.3                    | 31.3                 | 62.5                     | 6.3                   | 6.3                     | 6.3                 | 43.8                     | 6.3                   |
| Diazepam                          | 6.3                    | 62.5                 | 12.5                     | 0.0                   | 43.8                    | 68.8                | 0.0                      | 0.0                   |
| Diclofenac                        | 42.9                   | 50.0                 | 35.7                     | 6.3                   | 85.7                    | 93.8                | 0.0                      | 81.3                  |
| Digoxin                           | 21.4                   | 62.5                 | 28.6                     | 0.0                   | 28.6                    | 68.8                | 0.0                      | 56.3                  |
| Enalapril                         | 0.0                    | 68.8                 | 62.5                     | 18.8                  | 12.5                    | 68.8                | 12.5                     | 50.0                  |
| Fluconazole                       | 0.0                    | 37.5                 | 18.8                     | 25.0                  | 43.8                    | 43.8                | 0.0                      | 50.0                  |
| Fluoxetine                        | 0.0                    | 43.8                 | 12.5                     | 43.8                  | 6.3                     | 62.5                | 6.3                      | 62.5                  |
| Fluphenazine Decanoate            | 0.0                    | 0.0                  | 0.0                      | 12.5                  | 0.0                     | 0.0                 | 7.1                      | 6.3                   |
| Furosemide                        | 12.5                   | 93.8                 | 50.0                     | 6.3                   | 50.0                    | 87.5                | 0.0                      | 0.0                   |
| Glibenclamide                     | 18.8                   | 68.8                 | 56.3                     | 12.5                  | 68.8                    | 93.8                | 0.0                      | 12.5                  |
| Gliclazide                        | 0.0                    | 75.0                 | 0.0                      | 18.8                  | 7.1                     | 75.0                | 0.0                      | 31.3                  |
| Hydrochlorothiazide               | 0.0                    | 0.0                  | 0.0                      | 12.5                  | 18.8                    | 0.0                 | 0.0                      | 0.0                   |
| Indinavir                         | 0.0                    | 0.0                  | 0.0                      | 0.0                   | 0.0                     | 0.0                 | 0.0                      | 0.0                   |
| Insulin Isophane (NPH)            | 0.0                    | 75.0                 | 50.0                     | 25.0                  | 56.3                    | 68.8                | 0.0                      | 18.8                  |
| Insulin Neutral Soluble (Regular) | 0.0                    | 68.8                 | 50.0                     | 25.0                  | 68.8                    | 68.8                | 0.0                      | 18.8                  |
| Losartan                          | 7.1                    | 43.8                 | 14.3                     | 43.8                  | 0.0                     | 43.8                | 42.9                     | 43.8                  |
| Lovastatin                        | 0.0                    | 0.0                  | 6.3                      | 0.0                   | 6.3                     | 37.5                | 12.5                     | 0.0                   |

|                                |      |      |      |      |      |       |      |      |
|--------------------------------|------|------|------|------|------|-------|------|------|
| Metformin                      | 25.0 | 81.3 | 56.3 | 31.3 | 68.8 | 93.8  | 0.0  | 50.0 |
| Methyldopa                     | 12.5 | 81.3 | 25.0 | 0.0  | 75.0 | 68.8  | 0.0  | 0.0  |
| Metronidazole                  | 25.0 | 93.8 | 56.3 | 37.5 | 75.0 | 87.5  | 0.0  | 56.3 |
| Nevirapine                     | 0.0  | 0.0  | 14.3 | 0.0  | 0.0  | 0.0   | 0.0  | 0.0  |
| Nifedipine Retard              | 0.0  | 75.0 | 28.6 | 12.5 | 0.0  | 31.3  | 14.3 | 12.5 |
| Omeprazole                     | 6.3  | 56.3 | 75.0 | 37.5 | 62.5 | 62.5  | 6.3  | 50.0 |
| Omeprazole (10)                | 0.0  | 12.5 | 43.8 | 18.8 | 18.8 | 0.0   | 12.5 | 31.3 |
| Paracetamol suspension         | 6.3  | 68.8 | 87.5 | 25.0 | 81.3 | 87.5  | 0.0  | 81.3 |
| Phenytoin                      | 0.0  | 6.3  | 12.5 | 6.3  | 0.0  | 50.0  | 6.3  | 0.0  |
| Propranolol                    | 12.5 | 68.8 | 12.5 | 6.3  | 18.8 | 87.5  | 0.0  | 25.0 |
| Pyrimethamine with sulfadoxine | 0.0  | 75.0 | 21.4 | 6.3  | 21.4 | 68.8  | 0.0  | 6.3  |
| Ranitidine                     | 0.0  | 81.3 | 31.3 | 25.0 | 50.0 | 100.0 | 0.0  | 50.0 |
| Salbutamol inhaler             | 0.0  | 81.3 | 56.3 | 31.3 | 62.5 | 68.8  | 0.0  | 12.5 |
| Simvastatin                    | 0.0  | 25.0 | 21.4 | 56.3 | 0.0  | 37.5  | 7.1  | 25.0 |
| Spirolactone                   | 6.3  | 62.5 | 25.0 | 0.0  | 12.5 | 93.8  | 6.3  | 43.8 |
| Zidovudine                     | 0.0  | 0.0  | 0.0  | 0.0  | 0.0  | 0.0   | 0.0  | 0.0  |
| Mean availabilities            | 6.8  | 55.0 | 35.1 | 20.3 | 33.1 | 58.3  | 9.0  | 32.3 |

Table (S2). Change in availability at different levels of healthcare (Public Sector).

|                                             | Primary level<br>(n=2 outlets) |                | Secondary level (n=13<br>outlets) |                | Tertiary level<br>(n=1 outlet) |                |
|---------------------------------------------|--------------------------------|----------------|-----------------------------------|----------------|--------------------------------|----------------|
|                                             | All medicines<br>(n=50)        |                | All medicines<br>(n=50)           |                | All medicines<br>(n=50)        |                |
|                                             | OB                             | LPG            | OB                                | LPG            | OB                             | LPG            |
| Mean<br>Availability<br>2017<br>(SD),%      | 0.0<br>(0.0)                   | 25.8<br>(44.5) | 7.1<br>(11.2)                     | 35.2<br>(27.5) | 12.0<br>(32.8)                 | 50.0<br>(50.5) |
| Mean<br>Availability<br>2019<br>(SD) ,%     | 21.0<br>(31.0)                 | 3.2<br>(18)    | 32.3<br>(29.1)                    | 7.4<br>(13.4)  | 68.0<br>(47.1)                 | 22.0<br>(41.8) |
| Change in mean<br>percent<br>availability,% | 21.0                           | -22.6          | 25.2                              | -27.8          | 56.0                           | -28.0          |

**Table S3.** Change in median unit prices (MUPs) and median price ratios (MPRs) of the Originator Brands (OBs) at private sector.

| Sr. no. | Medicines (OB)                    | MUPs 2017 (PKR) | MPR 2017 | Adjusted MUP in 2019 | MPR 2019 | Percentage change in MUPs/MPRs |
|---------|-----------------------------------|-----------------|----------|----------------------|----------|--------------------------------|
| 1       | Acetylsalicylic Acid              | 1.16            | 0.8      | 1.12                 | 0.7      | -3.41%                         |
| 2       | Aciclovir                         | 70              | 20       | 72.5                 | 21       | 3.48%                          |
| 3       | Amiodarone                        | 17.78           | 2.2      | 17.4                 | 2.2      | -2.15%                         |
| 4       | Amlodipine                        | 11.93           | 7.3      | 12.6                 | 7.7      | 5.1%                           |
| 5       | Amoxicillin                       | 8.616           | 2.8      | 8.46                 | 2.7      | -1.83%                         |
| 6       | Amoxicillin (250)                 | 3.56            | 2.1      | 3.63                 | 2.2      | 1.83%                          |
| 7       | Atenolol                          | 6.19            | 5.6      | 6.14                 | 5.5      | -0.81%                         |
| 8       | Atorvastatin                      | 201.9           | 18       | 197                  | 18       | -2.6%                          |
| 9       | Azithromycin                      | 40              | 1.7      | 118                  | 5        | 66.2%                          |
| 10      | Beclometasone inhaler             | 1.25            | 1.2      | 1.84                 | 1.8      | 32%                            |
| 11      | Bisoprolol                        | 11.28           | 1.2      | 16.2                 | 1.7      | 30.2%                          |
| 12      | Captopril                         | 7.66            | 3        | 8.22                 | 3.2      | 6.81%                          |
| 13      | Carbamazepine                     | 4.91            | 2.6      | 4.84                 | 2.5      | -1.55%                         |
| 14      | Ceftriaxone injection             | 672             | 16       | 757                  | 18       | 11.2%                          |
| 15      | Ciprofloxacin                     | 50.4            | 13       | 50.8                 | 13       | 0.72%                          |
| 16      | Clarithromycin                    | 65.7            | 2.5      | 76.4                 | 2.9      | 14%                            |
| 17      | Co-trimoxazole suspension         | 0.29            | 0.6      | 0.44                 | 0.9      | 33.4%                          |
| 18      | Diazepam                          | 2               | 2        | 1.93                 | 1.9      | -3.41%                         |
| 19      | Diclofenac                        | 5.625           | 12       | 5.61                 | 12       | -0.29%                         |
| 20      | Digoxin                           | 2.52            | 2.4      | 2.59                 | 2.5      | 2.76%                          |
| 21      | Enalapril                         | 5.85            | 5.4      | 6                    | 5.6      | 2.43%                          |
| 22      | Fluconazole                       | 442             | 61       | 566                  | 78       | 21.9%                          |
| 23      | Fluoxetine                        | 43.42           | 9.7      | 43                   | 9.6      | -0.9%                          |
| 24      | Furosemide                        | 1.89            | 3        | 2.34                 | 3.7      | 19.2%                          |
| 25      | Glibenclamide                     | 1.69            | 2.9      | 2.09                 | 3.5      | 19.1%                          |
| 26      | Gliclazide                        | 7.6             | 1.5      | 16.4                 | 3.3      | 53.8%                          |
| 27      | Insulin Isophane (NPH)            | 64.5            | 1.1      | 73.4                 | 1.3      | 12.1%                          |
| 28      | Insulin Neutral Soluble (Regular) | 64.5            | 1.1      | 73.4                 | 1.2      | 12.1%                          |
| 29      | Losartan                          | 51.67           | 4.3      | 50.3                 | 4.2      | -2.76%                         |
| 30      | Metformin                         | 1.54            | 1        | 1.62                 | 1        | 5.21%                          |
| 31      | Methyldopa                        | 6.38            | 1.9      | 7.83                 | 2.3      | 18.5%                          |
| 32      | Metronidazole                     | 1.57            | 1.3      | 1.52                 | 1.2      | -3.41%                         |
| 33      | Nifedipine Retard                 | 5.69            | 2.7      | 5.8                  | 2.8      | 1.93%                          |
| 34      | Omeprazole                        | 49.78           | 34       | 50.6                 | 35       | 1.55%                          |
| 35      | Paracetamol suspension            | 0.85            | 1.6      | 2.2                  | 4.1      | 61.4%                          |
| 36      | Phenytoin                         | 5.2             | 4.8      | 23.2                 | 22       | 77.6%                          |
| 37      | Propranolol                       | 1.55            | 2.2      | 3.06                 | 4.3      | 49.3%                          |

|    |                                |       |     |      |     |        |
|----|--------------------------------|-------|-----|------|-----|--------|
| 38 | Pyrimethamine with sulfadoxine | 5.83  | 1.4 | 11.6 | 2.8 | 49.8%  |
| 39 | Ranitidine                     | 8.8   | 3.7 | 8.51 | 3.6 | -3.41% |
| 40 | Salbutamol inhaler             | 1     | 1   | 1.03 | 1.1 | 3.35%  |
| 41 | Simvastatin                    | 67.13 | 12  | 65.8 | 12  | -2.09% |
| 42 | Spirolactone                   | 8.6   | 0.8 | 10.1 | 1   | 14.5%  |
|    | Medians                        | 6.99  | 2.5 | 8.49 | 3.2 | 4.29%  |

**Table S4.** Change in median unit prices (MUPs) and median price ratios (MPRs) of the lowest price generics (LPGs) in private sector.

| Sr. no. | Medicines                 | MUPs 2017 (PKR) | MPR 2017 | Adjusted MUP in 2019 | MPR 2019 | Percentage change in MUPs/MPRs |
|---------|---------------------------|-----------------|----------|----------------------|----------|--------------------------------|
| 1       | Acetylsalicylic Acid      | 1.015           | 0.7      | 1.06                 | 0.7      | 4.58                           |
| 2       | Aciclovir                 | 12.4            | 3.6      | 13.5                 | 3.9      | 8.41                           |
| 3       | Amitriptyline             | 1.19            | 1.4      | 1.24                 | 1.4      | 3.86                           |
| 4       | Amlodipine                | 1.8             | 1.1      | 6.29                 | 3.8      | 71.4                           |
| 5       | Amoxicillin               | 5.8             | 1.9      | 8.32                 | 2.7      | 30.3                           |
| 6       | Amoxicillin (250)         | 3               | 1.8      | 3.48                 | 2.1      | 13.8                           |
| 7       | Atenolol                  | 2.05            | 1.8      | 2.47                 | 2.2      | 16.9                           |
| 8       | Atorvastatin              | 37.5            | 3.4      | 35.8                 | 3.2      | -4.8                           |
| 9       | Azithromycin              | 40              | 1.7      | 19.3                 | 0.8      | -107                           |
| 10      | Bisoprolol                | 6.55            | 0.7      | 6.56                 | 0.7      | 0.1                            |
| 11      | Captopril                 | 6.5             | 2.5      | 6.77                 | 2.7      | 3.97                           |
| 12      | Carbamazepine             | 3.3             | 1.7      | 4.35                 | 2.3      | 24.2                           |
| 13      | Ceftriaxone injection     | 280             | 6.8      | 290                  | 7        | 3.48                           |
| 14      | Ciprofloxacin             | 11              | 2.8      | 24.2                 | 6.2      | 54.5                           |
| 15      | Clarithromycin            | 36              | 1.4      | 42.7                 | 1.6      | 15.8                           |
| 16      | Co-trimoxazole suspension | 0.21            | 0.4      | 2.32                 | 4.7      | 91                             |
| 17      | Diclofenac                | 3.5             | 7.5      | 4.79                 | 10       | 26.9                           |
| 18      | Enalapril                 | 2.05            | 1.9      | 2.84                 | 2.6      | 27.8                           |
| 19      | Fluconazole               | 145.5           | 20       | 145                  | 20       | -0.3                           |
| 20      | Fluoxetine                | 13.8            | 3.1      | 13.5                 | 3        | -1.9                           |
| 21      | Fluphenazine Decanoate    | 90.5            | 1        | 93.8                 | 1.1      | 3.5                            |
| 22      | Glibenclamide             | 1.57            | 2.7      | 1.42                 | 2.4      | -10                            |
| 23      | Gliclazide                | 4.75            | 0.9      | 5.8                  | 1.1      | 18.1                           |

|    |                                   |            |            |             |            |             |
|----|-----------------------------------|------------|------------|-------------|------------|-------------|
| 24 | Insulin Isophane (NPH)            | 48         | 0.8        | 62.3        | 1.1        | 22.9        |
| 25 | Insulin Neutral Soluble (Regular) | 48         | 0.8        | 62.3        | 1          | 22.9        |
| 26 | Losartan                          | 11         | 0.9        | 13.1        | 1.1        | 15.7        |
| 27 | Metformin                         | 1.5        | 1          | 1.86        | 1.2        | 19.2        |
| 28 | Metronidazole                     | 1.5        | 1.2        | 1.93        | 1.6        | 22.4        |
| 29 | Nifedipine Retard                 | 2.65       | 1.3        | 5.14        | 2.4        | 48.4        |
| 30 | Omeprazole                        | 15.35      | 10         | 11.4        | 7.8        | -35         |
| 31 | Omeprazole (10)                   | 12.14      | 0.9        | 5.13        | 0.4        | -137        |
| 32 | Paracetamol suspension            | 0.47       | 0.9        | 1.02        | 1.9        | 53.7        |
| 33 | Propranolol                       | 0.66       | 0.9        | 2.03        | 2.8        | 67.5        |
| 34 | Pyrimethamine with sulfadoxine    | 5          | 1.2        | 4.84        | 1.2        | -3.4        |
| 35 | Ranitidine                        | 6.93       | 2.9        | 7.78        | 3.3        | 11          |
| 36 | Salbutamol inhaler                | 0.64       | 0.7        | 0.68        | 0.7        | 5.45        |
| 37 | Simvastatin                       | 8.5        | 1.6        | 16.6        | 3          | 48.7        |
|    | <b>Medians</b>                    | <b>5.8</b> | <b>1.4</b> | <b>6.29</b> | <b>2.3</b> | <b>15.7</b> |

**Table S5.** Affordability of originator brands (OBs) for different diseases in 2017 and 2019, in private sector.

| Disease                        | Medicine           | Strength    | Dosage form | No. of units needed per treatment | Durati on of treatm ent | MTP 2017 (PKR ) | NDWs 2017 | MTP 2019 (PKR ) | NDWs 2019 |
|--------------------------------|--------------------|-------------|-------------|-----------------------------------|-------------------------|-----------------|-----------|-----------------|-----------|
| <b>ASTHMA</b>                  | Salbutamol Inhaler | 100mcg/dose | Inhaler     | 200                               | As needed               | 200             | 0.4       | 214             | 0.4       |
|                                | Beclomethasone     | 50mcg/dose  | inhaler     | 200                               | As needed               | 250             | 0.5       | 380             | 0.8       |
| <b>Cardiovascular Diseases</b> | Bisoprolol         | 5mg         | tab         | 60                                | 30                      | 676.8           | 1.5       | 1003            | 2         |
|                                | Atenolol           | 50mg        | tab         | 30                                | 30                      | 185.7           | 0.4       | 190.5           | 0.4       |
|                                | Captopril          | 25mg        | tab         | 60                                | 30                      | 459.6           | 1         | 510             | 1         |
|                                | Amlodipine         | 5mg         | tab         | 60                                | 30                      | 715.8           | 1.5       | 780             | 1.6       |
|                                | Amiodarone         | 200mg       | tab         | 60                                | 30                      | 1066.8          | 2.3       | 1080            | 2.2       |
|                                | Losartan           | 50mg        | tab         | 60                                | 30                      | 3100.2          | 6.6       | 3120            | 6.2       |
|                                | methyldopa         | 250mg       | tab         | 90                                | 30                      | 574.2           | 1.2       | 729             | 1.5       |
| Nifedipine retard              | 20mg               | tab         | 90          | 30                                | 512.1                   | 1.1             | 540       | 1.1             |           |

|                                                     |                                   |          |         |     |    |        |     |       |     |
|-----------------------------------------------------|-----------------------------------|----------|---------|-----|----|--------|-----|-------|-----|
|                                                     | Spironolactone                    | 100mg    | tab     | 30  | 30 | 258    | 0.5 | 312   | 0.6 |
|                                                     | Propranolol                       | 40mg     | tab     | 90  | 30 | 139.5  | 0.3 | 284.4 | 0.6 |
|                                                     | Acetylsalicylic acid              | 75mg     | tab     | 30  | 30 | 34.8   | 0.1 | 34.8  | 0.1 |
| <b>Anti hyperlipidemics</b>                         | Simvastatin                       | 20mg     | Cap/tab | 30  | 30 | 2013.9 | 4.3 | 2040  | 4.1 |
|                                                     | Atorvastatin                      | 20mg     | Cap/tab | 30  | 30 | 6057   | 13  | 6105  | 12  |
| <b>Infections-Adult respiratory tract infection</b> | Ceftriaxone Injection             | 1g/vial  | Inj.    | 1   | 1  | 672    | 1.4 | 783   | 1.6 |
|                                                     | Ciprofloxacin                     | 500mg    | tab     | 14  | 7  | 705.6  | 1.5 | 735   | 1.5 |
|                                                     | Azithromycin                      | 500mg    | tab     | 3   | 3  | 120    | 0.3 | 367   | 0.7 |
|                                                     | clarithromycin                    | 500mg    | tab     | 28  | 14 | 1839.6 | 3.9 | 2212  | 4.4 |
|                                                     | Amoxicillin                       | 500mg    | cap     | 42  | 14 | 361.87 | 0.8 | 367.5 | 0.7 |
|                                                     | Amoxicillin                       | 250mg    | cap     | 84  | 14 | 299.04 | 0.6 | 315   | 0.6 |
| <b>Fungal Infection</b>                             | Fluconazole                       | 200mg    | cap     | 1   | 1  | 442    | 0.9 | 585   | 1.2 |
| <b>Viral Infection</b>                              | aciclovir                         | 200mg    | tab     | 25  | 5  | 1750   | 3.8 | 1875  | 3.8 |
| <b>Amoebiasis</b>                                   | metronidazole                     | 400mg    | tab     | 21  | 7  | 32.97  | 0.1 | 32.97 | 0.1 |
| <b>CNS Drugs-Anti epileptics</b>                    | Carbamezipine                     | 200mg    | tab     | 60  | 30 | 294.6  | 0.6 | 300   | 0.6 |
|                                                     | Phenytoin                         | 100mg    | tab     | 90  | 30 | 468    | 1   | 2160  | 4.3 |
| <b>Anxiety</b>                                      | diazepam                          | 5mg      | tab     | 90  | 30 | 180    | 0.4 | 180   | 0.4 |
| <b>Anti Diabetics</b>                               | Metformin                         | 500mg    | tab     | 90  | 30 | 138.6  | 0.3 | 151.2 | 0.3 |
|                                                     | Glibenclamide                     | 5mg      | tab     | 90  | 30 | 152    | 0.3 | 194.4 | 0.4 |
|                                                     | Gliclazide                        | 80mg     | tab     | 60  | 30 | 456    | 1.5 | 1020  | 2   |
|                                                     | Insulin Isophane (NPH)            | 100IU/ml | vial    | 10  | 30 | 645    | 1.4 | 758.8 | 1.5 |
|                                                     | Insulin Neutral Soluble (Regular) | 100IU/ml | vial    | 10  | 30 | 645    | 1.4 | 758.8 | 1.5 |
| <b>Ulcer Treatment</b>                              | Omeprazole                        | 20mg     | cap     | 30  | 30 | 1493.4 | 3.2 | 1569  | 3.1 |
|                                                     | ranitidine                        | 150mg    | tab     | 120 | 30 | 1056   | 2.3 | 1056  | 2.1 |
| <b>Pain/Inflammation Arthritis</b>                  | Paracetamol                       | 24mg/ml  | susp    | 45  | 3  | 38.25  | 0.1 | 102.6 | 0.2 |
|                                                     | Diclofenac                        | 50mg     | tab     | 90  | 30 | 506.25 | 1.1 | 522   | 1   |

Where, MTP: Median treatment price, NDWs: Number of days' wages

**Table S6.** Affordability of lowest price generics (LPGs) for different diseases in 2017 and 2019, in private sector.

| Disease/Condition                            | Medicine              | Strength    | Dosage form | No. of units needed per treatment | Duration of treatment | MTP 2017 (PKR) | NDWs 2017 | MTP 2019 (PKR) | NDWs 2019 |
|----------------------------------------------|-----------------------|-------------|-------------|-----------------------------------|-----------------------|----------------|-----------|----------------|-----------|
| ASTHMA                                       | Salbutamol Inhaler    | 100mcg/dose | Inhaler     | 200                               | As needed             | 128            | 0.3       | 140            | 0.3       |
| Cardiovascular Diseases/ Anti Hypertensives  | Bisoprolol            | 5mg         | tab         | 60                                | 30                    | 393            | 0.8       | 406.8          | 0.8       |
|                                              | Atenolol              | 50mg        | tab         | 30                                | 30                    | 61.5           | 0.1       | 76.5           | 0.2       |
|                                              | Captopril             | 25mg        | tab         | 60                                | 30                    | 390            | 0.8       | 420            | 0.8       |
|                                              | Amlodipine            | 5mg         | tab         | 60                                | 30                    | 108            | 0.2       | 390            | 0.8       |
|                                              | Losartan              | 50mg        | tab         | 60                                | 30                    | 660            | 1.4       | 810            | 1.6       |
|                                              | Nifedipine retard     | 20mg        | tab         | 90                                | 30                    | 238.5          | 0.5       | 478.4          | 1         |
|                                              | Propranolol           | 40mg        | tab         | 90                                | 30                    | 59.4           | 0.1       | 189            | 0.4       |
|                                              | Acetylsalicylic acid  | 75mg        | tab         | 30                                | 30                    | 30.45          | 0.1       | 33             | 0.1       |
| Anti hyperlipidemics                         | Simvastatin           | 20mg        | Cap/tablet  | 30                                | 30                    | 255            | 0.5       | 513.8          | 1         |
|                                              | Atorvastatin          | 20mg        | Cap/tablet  | 30                                | 30                    | 1125           | 2.4       | 1110           | 2.2       |
| Infections-Adult respiratory tract infection | Ceftriaxone Injection | 1g/vial     | Inj.        | 1                                 | 1                     | 280            | 0.6       | 300            | 0.6       |
|                                              | Ciprofloxacin         | 500mg       | tab         | 14                                | 7                     | 154            | 0.3       | 350            | 0.7       |
|                                              | Azithromycin          | 500mg       | tab         | 3                                 | 3                     | 120            | 0.3       | 60             | 0.1       |
|                                              | clarithromycin        | 500mg       | tab         | 28                                | 14                    | 1008           | 2.2       | 1238           | 2.5       |
|                                              | Amoxicillin           | 500mg       | cap         | 42                                | 14                    | 243.6          | 0.5       | 361.2          | 0.7       |
|                                              | Amoxicillin           | 250mg       | cap         | 84                                | 14                    | 252            | 0.5       | 302.4          | 0.6       |
| Fungal Infection                             | Fluconazole           | 200mg       | cap         | 1                                 | 1                     | 145.5          | 0.3       | 150            | 0.3       |
| Viral Infection                              | aciclovir             | 200mg       | tab         | 25                                | 5                     | 310            | 0.7       | 350            | 0.7       |
| Amoebiasis                                   | metronidazole         | 400mg       | tab         | 21                                | 7                     | 31.5           | 0.1       | 42             | 0.1       |
| CNS Drugs-Anti epileptics                    | Carbamezipine         | 200mg       | tab         | 60                                | 30                    | 198            | 0.4       | 270            | 0.5       |
| Depression                                   | Amitriptyline         | 25mg        | tab         | 60                                | 30                    | 71.4           | 0.2       | 76.8           | 0.2       |

|    |                 |             |          |      |     |    |       |     |       |     |
|----|-----------------|-------------|----------|------|-----|----|-------|-----|-------|-----|
| 1  | Anti Diabetics  | Metformin   | 500mg    | tab  | 90  | 30 | 135   | 0.3 | 180   | 0.4 |
| 2  |                 | Glibenclami | 5mg      | tab  | 90  | 30 | 141   | 0   | 132.3 | 0.3 |
| 3  |                 | de          |          |      |     |    |       |     |       |     |
| 4  |                 | Gliclazide  | 80mg     | tab  | 60  | 30 | 285   | 0.8 | 360   | 0.7 |
| 5  |                 | Insulin     | 100IU/ml | vial | 10  | 30 | 480   | 1   | 644   | 1.3 |
| 6  |                 | Isophane    |          |      |     |    |       |     |       |     |
| 7  |                 | (NPH)       |          |      |     |    |       |     |       |     |
| 8  |                 | Insulin     | 100IU/ml | vial | 10  | 30 | 480   | 1   | 644   | 1.3 |
| 9  |                 | Neutral     |          |      |     |    |       |     |       |     |
| 10 |                 | Soluble     |          |      |     |    |       |     |       |     |
| 11 |                 | (Regular)   |          |      |     |    |       |     |       |     |
| 12 | Ulcer Treatment | Omeprazole  | 20mg     | cap  | 30  | 30 | 460.5 | 1   | 353.7 | 0.7 |
| 13 |                 | ranitidine  | 150mg    | tab  | 120 | 30 | 831.6 | 1.8 | 966   | 1.9 |
| 14 | Pain/Inflammati | Paracetamol | 24mg/ml  | susp | 45  | 3  | 21.15 | 0   | 47.25 | 0.1 |
| 15 | on              |             |          |      |     |    |       |     |       |     |
| 16 | Arthritis       | Diclofenac  | 50mg     | tab  | 90  | 30 | 315   | 0.7 | 445.5 | 0.9 |

peer review only



## Research Checklist

Dear editor,

We submit the manuscript entitled “**Impact of National Drug Pricing Policy 2018 on Access to Medicines in Lahore Division, Pakistan: A Pre-Post Survey Study Using WHO/HAI Methodology**”, for your consideration to be published in *BMJ Open*. And we confirm that we have prepared submission materials according to the guideline.

And our main document has covered everything required, which including the following:

Title page

Abstract

Introduction

Methods

Results

Discussion

### **Other Information**

Funding

Acknowledgment

Contributorship Statement

Reference

Supplementary material

# BMJ Open

## Impact of National Drug Pricing Policy 2018 on Access to Medicines in Lahore Division, Pakistan: A Pre-Post Survey Study Using WHO/HAI Methodology

|                               |                                                                                                                                                                                                                                                                                                                                                                                                                                                                                                                                                                                                                                                                                                                                                                                                                                                                                                                                                                                                                                                                                                                                                                                                                                                                                                                                                                                                                                                                                                                                                                                                                                                                                                                                                                                                                                                                                                                                                                                                                                                                                                                                                                                                                                                                                                                                                                                                                                                                                                                                                                                                                                                                                                                                                         |
|-------------------------------|---------------------------------------------------------------------------------------------------------------------------------------------------------------------------------------------------------------------------------------------------------------------------------------------------------------------------------------------------------------------------------------------------------------------------------------------------------------------------------------------------------------------------------------------------------------------------------------------------------------------------------------------------------------------------------------------------------------------------------------------------------------------------------------------------------------------------------------------------------------------------------------------------------------------------------------------------------------------------------------------------------------------------------------------------------------------------------------------------------------------------------------------------------------------------------------------------------------------------------------------------------------------------------------------------------------------------------------------------------------------------------------------------------------------------------------------------------------------------------------------------------------------------------------------------------------------------------------------------------------------------------------------------------------------------------------------------------------------------------------------------------------------------------------------------------------------------------------------------------------------------------------------------------------------------------------------------------------------------------------------------------------------------------------------------------------------------------------------------------------------------------------------------------------------------------------------------------------------------------------------------------------------------------------------------------------------------------------------------------------------------------------------------------------------------------------------------------------------------------------------------------------------------------------------------------------------------------------------------------------------------------------------------------------------------------------------------------------------------------------------------------|
| Journal:                      | <i>BMJ Open</i>                                                                                                                                                                                                                                                                                                                                                                                                                                                                                                                                                                                                                                                                                                                                                                                                                                                                                                                                                                                                                                                                                                                                                                                                                                                                                                                                                                                                                                                                                                                                                                                                                                                                                                                                                                                                                                                                                                                                                                                                                                                                                                                                                                                                                                                                                                                                                                                                                                                                                                                                                                                                                                                                                                                                         |
| Manuscript ID                 | bmjopen-2019-034720.R1                                                                                                                                                                                                                                                                                                                                                                                                                                                                                                                                                                                                                                                                                                                                                                                                                                                                                                                                                                                                                                                                                                                                                                                                                                                                                                                                                                                                                                                                                                                                                                                                                                                                                                                                                                                                                                                                                                                                                                                                                                                                                                                                                                                                                                                                                                                                                                                                                                                                                                                                                                                                                                                                                                                                  |
| Article Type:                 | Original research                                                                                                                                                                                                                                                                                                                                                                                                                                                                                                                                                                                                                                                                                                                                                                                                                                                                                                                                                                                                                                                                                                                                                                                                                                                                                                                                                                                                                                                                                                                                                                                                                                                                                                                                                                                                                                                                                                                                                                                                                                                                                                                                                                                                                                                                                                                                                                                                                                                                                                                                                                                                                                                                                                                                       |
| Date Submitted by the Author: | 09-Apr-2020                                                                                                                                                                                                                                                                                                                                                                                                                                                                                                                                                                                                                                                                                                                                                                                                                                                                                                                                                                                                                                                                                                                                                                                                                                                                                                                                                                                                                                                                                                                                                                                                                                                                                                                                                                                                                                                                                                                                                                                                                                                                                                                                                                                                                                                                                                                                                                                                                                                                                                                                                                                                                                                                                                                                             |
| Complete List of Authors:     | <p>Saeed, Amna; Xi'an Jiaotong University, 1 Department of Pharmacy Administration and Clinical Pharmacy, School of Pharmacy, Xi'an Jiaotong University, Shaanxi, China, 2 Center for Drug Safety and Policy Research, Xian Jiaotong University, Xi'an, Shaanxi, China, 3 Shaanxi Centre for Health Reform and Development Research, Shaanxi, China</p> <p>Saeed, Hamid; University of the Punjab, Department of Pharmaceutics</p> <p>Saleem, Zikria; The University of Lahore, Faculty of Pharmacy</p> <p>Yang, Caijun; Xi'an Jiaotong University, 1 Department of Pharmacy Administration and Clinical Pharmacy, School of Pharmacy, Xi'an Jiaotong University, Shaanxi, China, 2 Center for Drug Safety and Policy Research, Xian Jiaotong University, Xi'an, Shaanxi, China, 3 Shaanxi Centre for Health Reform and Development Research, Shaanxi, China</p> <p>Jiang, Minghuan; Xi'an Jiaotong University, 1 Department of Pharmacy Administration and Clinical Pharmacy, School of Pharmacy, Xi'an Jiaotong University, Shaanxi, China, 2 Center for Drug Safety and Policy Research, Xian Jiaotong University, Xi'an, Shaanxi, China, 3 Shaanxi Centre for Health Reform and Development Research, Shaanxi, China</p> <p>Zhao, Mingyue; Xi'an Jiaotong University, 1 Department of Pharmacy Administration and Clinical Pharmacy, School of Pharmacy, Xi'an Jiaotong University, Shaanxi, China, 2 Center for Drug Safety and Policy Research, Xian Jiaotong University, Xi'an, Shaanxi, China, 3 Shaanxi Centre for Health Reform and Development Research, Shaanxi, China</p> <p>Ji, Wenjing ; Xi'an Jiaotong University, 1 Department of Pharmacy Administration and Clinical Pharmacy, School of Pharmacy, Xi'an Jiaotong University, Shaanxi, China, 2 Center for Drug Safety and Policy Research, Xian Jiaotong University, Xi'an, Shaanxi, China, 3 Shaanxi Centre for Health Reform and Development Research, Shaanxi, China</p> <p>Aziz, Muhammad Majid; Xi'an Jiaotong University, 1 Department of Pharmacy Administration and Clinical Pharmacy, School of Pharmacy, Xi'an Jiaotong University, Shaanxi, China, 2 Center for Drug Safety and Policy Research, Xian Jiaotong University, Xi'an, Shaanxi, China, 3 Shaanxi Centre for Health Reform and Development Research, Shaanxi, China</p> <p>Khan, Faiz; Xi'an Jiaotong University, 1 Department of Pharmacy Administration and Clinical Pharmacy, School of Pharmacy, Xi'an Jiaotong University, Shaanxi, China, 2 Center for Drug Safety and Policy Research, Xian Jiaotong University, Xi'an, Shaanxi, China, 3 Shaanxi Centre for Health Reform and Development Research, Shaanxi, China</p> <p>Gillani, Ali Hassan; Xi'an Jiaotong University, 1 Department of Pharmacy</p> |

|                                 |                                                                                                                                                                                                                                                                                                                                                                                                                                                                                                                                                                                                                                                                                                                                                                                                                                                                                                                                                                                                                                   |
|---------------------------------|-----------------------------------------------------------------------------------------------------------------------------------------------------------------------------------------------------------------------------------------------------------------------------------------------------------------------------------------------------------------------------------------------------------------------------------------------------------------------------------------------------------------------------------------------------------------------------------------------------------------------------------------------------------------------------------------------------------------------------------------------------------------------------------------------------------------------------------------------------------------------------------------------------------------------------------------------------------------------------------------------------------------------------------|
|                                 | Administration and Clinical Pharmacy, School of Pharmacy, Xi'an Jiaotong University, Shaanxi, China, 2 Center for Drug Safety and Policy Research, Xian Jiaotong University, Xi'an, Shaanxi, China, 3 Shaanxi Centre for Health Reform and Development Research, Shaanxi, China Atif, Naveel; Xi'an Jiaotong University, 1 Department of Pharmacy Administration and Clinical Pharmacy, School of Pharmacy, Xi'an Jiaotong University, Shaanxi, China, 2 Center for Drug Safety and Policy Research, Xian Jiaotong University, Xi'an, Shaanxi, China, 3 Shaanxi Centre for Health Reform and Development Research, Shaanxi, China Fang, Yu; Xi'an Jiaotong University, 1 Department of Pharmacy Administration and Clinical Pharmacy, School of Pharmacy, Xi'an Jiaotong University, Shaanxi, China, 2 Center for Drug Safety and Policy Research, Xian Jiaotong University, Xi'an, Shaanxi, China, 3 Shaanxi Centre for Health Reform and Development Research, Shaanxi, China Babar, Zaheer Ud Din; University of Huddersfield, |
| <b>Primary Subject Heading</b>: | Pharmacology and therapeutics                                                                                                                                                                                                                                                                                                                                                                                                                                                                                                                                                                                                                                                                                                                                                                                                                                                                                                                                                                                                     |
| Secondary Subject Heading:      | Health policy, Health economics, Health services research, Pharmacology and therapeutics                                                                                                                                                                                                                                                                                                                                                                                                                                                                                                                                                                                                                                                                                                                                                                                                                                                                                                                                          |
| Keywords:                       | HEALTH ECONOMICS, Health policy < HEALTH SERVICES ADMINISTRATION & MANAGEMENT, Pharmacology < TROPICAL MEDICINE, HEALTH SERVICES ADMINISTRATION & MANAGEMENT                                                                                                                                                                                                                                                                                                                                                                                                                                                                                                                                                                                                                                                                                                                                                                                                                                                                      |
|                                 |                                                                                                                                                                                                                                                                                                                                                                                                                                                                                                                                                                                                                                                                                                                                                                                                                                                                                                                                                                                                                                   |

SCHOLARONE™  
Manuscripts



I, the Submitting Author has the right to grant and does grant on behalf of all authors of the Work (as defined in the below author licence), an exclusive licence and/or a non-exclusive licence for contributions from authors who are: i) UK Crown employees; ii) where BMJ has agreed a CC-BY licence shall apply, and/or iii) in accordance with the terms applicable for US Federal Government officers or employees acting as part of their official duties; on a worldwide, perpetual, irrevocable, royalty-free basis to BMJ Publishing Group Ltd ("BMJ") its licensees and where the relevant Journal is co-owned by BMJ to the co-owners of the Journal, to publish the Work in this journal and any other BMJ products and to exploit all rights, as set out in our [licence](#).

The Submitting Author accepts and understands that any supply made under these terms is made by BMJ to the Submitting Author unless you are acting as an employee on behalf of your employer or a postgraduate student of an affiliated institution which is paying any applicable article publishing charge ("APC") for Open Access articles. Where the Submitting Author wishes to make the Work available on an Open Access basis (and intends to pay the relevant APC), the terms of reuse of such Open Access shall be governed by a Creative Commons licence – details of these licences and which [Creative Commons](#) licence will apply to this Work are set out in our licence referred to above.

Other than as permitted in any relevant BMJ Author's Self Archiving Policies, I confirm this Work has not been accepted for publication elsewhere, is not being considered for publication elsewhere and does not duplicate material already published. I confirm all authors consent to publication of this Work and authorise the granting of this licence.

# Impact of National Drug Pricing Policy 2018 on Access to Medicines in Lahore Division, Pakistan: A Pre-Post Survey Study Using WHO/HAI Methodology

Amna Saeed<sup>1,2,3</sup>, Hamid Saeed<sup>4</sup>, Zikria Saleem<sup>5</sup>, Caijun Yang<sup>1,2,3</sup>, Minghuan Jiang<sup>1,2,3</sup>, Mingyue Zhao<sup>1,2,3</sup>, Wenjing Ji<sup>1,2,3</sup>, Muhammad Majid Aziz<sup>1,2,3</sup>, Faiz Ullah Khan<sup>1,2,3</sup>, Ali Hassan Gillani<sup>1,2,3</sup>, Naveel Atif<sup>1,2,3</sup>, Yu Fang<sup>1,2,3</sup>, and Zaheer Ud Din Babar<sup>6</sup>

1 Department of Pharmacy Administration and Clinical Pharmacy, School of Pharmacy, Xi'an Jiaotong University, Shaanxi, China,

2 Center for Drug Safety and Policy Research, Xian Jiaotong University, Xi'an, Shaanxi, China,

3 Shaanxi Centre for Health Reform and Development Research, Shaanxi, China,

4 Department of Pharmaceutics, University College of Pharmacy, University of the Punjab, Lahore, Pakistan,

5 Faculty of Pharmacy, The University of Lahore, Lahore, Pakistan,

6 Department of Pharmacy, School of Applied Sciences, University of Huddersfield, Huddersfield, West Yorkshire, United Kingdom.

**Correspondence:** Yu Fang, PhD, Professor Department of Pharmacy Administration and Clinical Pharmacy, School of Pharmacy, Xi'an Jiaotong University, Center for Drug Safety and Policy Research, Xi'an Jiaotong University 76 Yanta West Road Xi'an 710061 People, s Republic of China

Tell: +86-29-82655132

Mobile: 18591970591

Fax: +86-29-82655424

Email: yufang@mail.xjtu.edu.cn

**Word Count:** 5510

## 1 Abstract

2 **Objective:** To evaluate the impact of new national drug pricing policy (NDPP) 2018 on access to  
3 medicines in terms of prices, availability and affordability.

4 **Design:** Two cross-sectional surveys were undertaken before and after the launch of NDPP 2018,  
5 using a modified WHO/HAI methodology.

6 **Setting:** Four districts of Lahore division, Pakistan.

7 **Participants:** 16 public sector hospitals and 16 private sector retail pharmacies.

8 **Measures:** The pre and post survey data on prices and availability of Lowest Price Generics  
9 (LPGs) and Originator Brands (OBs) of 50 medicines were obtained by visiting the same public  
10 and private sector health facilities (n=32). 46 out of 50 surveyed medicines were from National  
11 Essential Medicines List (NEML). Inflation-adjusted median unit prices (MUPs) and median price  
12 ratios (MPRs) from 2019 were used for price comparison. Affordability was calculated in terms  
13 of number of days' wages required to get a standard treatment by the lowest paid unskilled  
14 government worker.

15 **Results:** The overall mean percent availabilities remained poor in both years i.e. far less than 80%.  
16 In public sector, the mean percent availability of OBs improved from 6.8% to 33.1% whereas, in  
17 case of LPGs it was reduced from 35.1% to 9%. In private sector, the mean percent availability of  
18 both OBs and LPGs demonstrated slight improvements in 2019 i.e. 55.0% to 58.3% and 20.3% to  
19 32.3%. The adjusted MUPs and MPRs of OBs significantly increased by a median of 4.29%  
20 (Wilcoxon test  $p=0.001$ ,  $p=0.0001$ ). Whereas, the adjusted MUPs and MPRs of LPGs were  
21 increased by a median of 15.7% ( $p=0.002$ ,  $p=0.0002$ ). Overall the affordability of many medicines  
22 for common ailments reduced significantly in 2019.

23 **Conclusions:** The availability of medicines slightly improved, except in the case of LPGs which  
24 was reduced at public sector. Although the main aim of NDPP 2018 was to make the drugs  
25 affordable, but its implementation led to increased drug prices thereby making standard treatment  
26 for some of the most prevalent ailments, unaffordable. This policy needs to be improved further to  
27 have strict price control especially for essential medicines, in order to improve their access.

**Strengths**

- This is the first study of its kind from Pakistan, where pre-post surveys were conducted and analyzed to estimate the impact of a national drug pricing policy, using the WHO/HAI methodology.
- The data was collected from the same health facilities in both years. So, the comparison is reliable. This study provides an objective evidence to the policy makers for improving the current pricing policies.

**Limitations**

- The study is limited to only one division of Pakistan, although the medicine prices are fixed centrally and are supposed to be same across the country – affecting generalizability of the findings.
- Moreover, this study is conducted after about a year from the launch of new drug pricing policy 2018, so the results do not reflect the long term impact of the policy.

## 64 Introduction

65 Access to affordable and quality assured essential medicines is considered as a key component of  
66 an effective healthcare system. It has also been pledged under Sustainable Development Goal  
67 (SDG) 3 by United Nations (UN) that the equitable access to affordable essential medicines will  
68 be ensured as a basic human right [1, 2]. Pakistani government, like many other Low and Middle  
69 Income Countries (LMICs), has been grappling with the issue of high medicine prices and poor  
70 availability of medicines that compromises the accessibility of medicines [1, 3-6]. The medicines  
71 are provided free of cost at public sector health facilities, while patient pays out of pocket to get  
72 medicines from private sector, in Pakistan [5]. In fact, the poor availability of medicines at public  
73 sector compels the patients to buy medicines from the private sector that escalates the burden on  
74 patient's pocket, as 24.3% (in 2015) of the population is living below the national poverty line [3,  
75 4, 7, 8]. Besides, medicine prices have increased up to 100%, both legally or illegally, in the past  
76 few years [3]. The drug prices are fixed by the federal government and the National Health Services  
77 Regulation and Coordination (NHSRC). The regional drug inspectors (DIs) are responsible for  
78 monitoring of drug prices in the pharmacies of their area. The NHSRC has been taking different  
79 policy measures to curb these issues through Drug Regulatory Authority of Pakistan (DRAP). The  
80 first ever National Drug Pricing Policy (NDPP) was launched in 2015 for making the pricing  
81 mechanism transparent but it had minimal impact on medicine prices, suitable for both patients  
82 and manufacturers as per media reports and available literature evidences [3, 9]. So, a new drug  
83 pricing policy was launched in 2018[10]. The objectives of this policy were to improve the access  
84 to essential medicines, devise rational prices, ensure a transparent mechanism for medicine pricing  
85 and to discourage illegal increase in drug prices.

86 Many modifications have been made to the pricing strategies in the NDPP 2018 compared to  
87 NDPP 2015, the most important one is the inclusion of all drugs (n=414) from National Essential  
88 Medicines List (NEML) under scheduled drugs category where drugs are kept under strict price  
89 control as compared to other drugs. Whereas in NDPP 2015, only 160 drugs from NEML were  
90 enlisted in this category [9, 10]. In NDPP 2018, the annual adjustment in prices has been linked  
91 with the Consumer Price Index (CPI), the Maximum Retail Prices (MRPs) of scheduled drugs (all  
92 drugs from NEML) could be increased up to 70% of the CPI, whereas the MRPs of all other drugs  
93 could be increased equivalent to CPI of the immediate preceding year. This step seems to improve  
94 the affordability of essential medicines (EMs) for patients in Pakistan. If several generics are  
95 already available in the market then in NDPP 2015, the MRP of new entrant was fixed by taking  
96 the average of other generics, while in NDPP 2018, MRP will be fixed equivalent to the highest  
97 MRP of the available generics [9, 10]. However, this would lead to even higher priced generics in  
98 the market that could compromise patient's affordability. Some media reports are claiming that  
99 the current increase (up to 200%) in medicines prices is the highest in the last 40 years, while  
100 others are claiming that government is taking action against this illegal rise in medicine prices [11,  
101 12]. But there is no objective evidence to prove or disapprove these claims. The NDPP 2018,  
102 allows the MRPs of the New Chemical Entities (NCEs) to be fixed by using the External Reference  
103 Pricing (ERP) mechanism by considering India, Bangladesh, Indonesia, Sri Lanka, Philippines,  
104 Lebanon and Malaysia as reference countries. However, the reason behind using the MRPs of  
105 these countries as reference is not clear, though some of them practice free market economy model



1  
2  
3 106 and don't impose any price control measures over the MRPs in community pharmacies that may  
4 107 lead to high prices. The NDPP 2018 also takes into account the wholesale or procurement prices  
5 108 from British National Formulary, Australian Pharmaceutical Benefit Scheme and New Zealand  
6 109 Pharmaceutical Management Agency while fixing the MRPs of NCEs, however these may not be  
7 110 the true prices because discounts and rebates are given as a common practice, while making the  
8 111 payments. So, these ambiguities in the policy necessitate the evaluation of actual impact of these  
9 112 policies on the access to medicines in Pakistan.

12 113 In this context, we designed a study to measure the impact of new NDPP 2018 on access to  
13 114 essential medicines in terms of their prices, availability and affordability in Lahore division  
14 115 Punjab. We undertook a survey after the implementation of NDPP 2018 and compared it with a  
15 116 similar survey performed before the launch of this policy in 2017. Considering the objectives of  
16 117 the NDPP 2018, we hypothesized that it will improve the availability and affordability, meanwhile  
17 118 decrease the prices of EMs.

## 20 21 119 **Methodology**

### 22 23 120 **Study Design**

24 121 Two cross-sectional studies were conducted in 2016-17 and 2019 using a variant of World Health  
25 122 Organization/Health Action International (WHO/HAI) methodology in four districts of Lahore  
26 123 division, Pakistan [13]. Since, the focus of this study was to measure the impact of NDPP 2018 in  
27 124 terms of changes in medicines prices, availability and affordability after its implementation, thus,  
28 125 the data on these parameters was collected to evaluate the accessibility of medicines in both years  
29 126 [10]. The first survey was conducted from November 2016 to March 2017, while the second survey  
30 127 was from March-May 2019, representing two fiscal years of Pakistan. For optimal and reliable  
31 128 comparison, the list of medicines, survey region and survey outlets selected for the survey 2019  
32 129 were similar to those selected for 2017. The details of survey region, medicine selection, sampling  
33 130 of medicine outlets and data collection are given elsewhere and are briefly described in this paper  
34 131 [7].

### 35 36 132 **Survey Areas**

37 133 Lahore is the largest division of Pakistan in terms of population i.e. 16.28 Million (2017) and  
38 134 estimated to be 19.4 Million as of 2018[14]. It consists of four districts named as Lahore, Kasur,  
39 135 Sheikhupura and Nankana Sahib which are further subdivided into 17 Tehsils. All the four districts  
40 136 were selected for the surveys.

### 41 42 137 **Sampling of Medicine Outlets**

43 138 Medicine outlets or health facilities from both public and private sectors were sampled  
44 139 systematically using WHO/HAI manual as a guiding principle in both the surveys [13]. Total 32  
45 140 medicine outlets were surveyed (16 from public sector and 16 from private sector). From public  
46 141 sector, hospitals from all three tiers of healthcare system i.e. primary, secondary and tertiary were  
47 142 selected. One main hospital in each district was selected as a survey anchor along with additional  
48 143 three more hospitals selected randomly and situated within three hours' drive from the main

1  
2  
3 144 hospital. In this way, 4 hospitals were selected in each district making up a total of 16 hospitals  
4 145 from Lahore division. From private sector, one registered pharmacy was selected situated within  
5 146 10 kilometers range of each public sector hospital. So, a total of 16 pharmacies were selected from  
6 147 Lahore division, i-e. 4 retail pharmacies from each district. It is important to note that each survey  
7 148 unit, one hospital and one nearby pharmacy, was located in different Tehsils, so out of 17 Tehsils  
8 149 of Lahore division, 16 were surveyed in both years.

### 11 150 **Selection of Medicines**

12  
13 151 50 medicines were selected for survey as per WHO/HAI methodology, which included all 14  
14 152 medicines from WHO core global list of medicines and 36 supplementary medicines. The criterion  
15 153 of selecting medicines for supplementary list was local disease burden and inclusion of medicines  
16 154 in NEML [15].

### 18 155 **Data Collection**

19  
20  
21 156 The data were collected using a data collection form by the trained data collectors. The data  
22 157 collectors visited the health facilities and physically checked the medicines prices and availability  
23 158 for both OBs and LPGs of each medicine and entered it into data collection forms. The data for  
24 159 each year were entered separately in to the WHO/HAI workbook by using double data entry  
25 160 process, to avoid any mistake [13]. The patient prices or the prices charged to patients were entered  
26 161 into the forms for private sector only, since the medicines are provided free of charge in public  
27 162 sector, in Pakistan. Thus, the availability of medicines was documented only for public sector  
28 163 facility.

### 30 164 **Data Analysis**

31  
32  
33 165 Data were analyzed by using WHO/HAI preprogrammed Excel workbook [13], IBM Statistical  
34 166 Package for the Social Sciences (SPSS) version 22.0 and R version 3.5.1 (codenamed “Feather  
35 167 Spray”).

36  
37  
38 168 *The availability* was calculated as percentage of particular medicine available at each facility  
39 169 on the day of data collection. The mean percentage availabilities were also calculated and  
40 170 compared between different sectors (public and private), product types (OBs and LPGs) and  
41 171 among different groups (global medicines, supplementary medicines, medicines from NEML,  
42 172 medicines used to treat NCDs and IDs). Availability was documented as follows; absent: 0% of  
43 173 facilities had surveyed enlisted medicines at the time of survey; Low: < 50% of facilities had the  
44 174 surveyed enlisted medicines; fairly high: 50 -80% of facilities had surveyed enlisted medicines;  
45 175 High: > 80% of facilities, survey enlisted medicines were found in most of the facilities [16, 17].

46  
47  
48 176 *Medicine prices* were calculated as Median Unit Prices (MUPs) in Pakistani Rupees (PKR)  
49 177 and were also compared with International Reference Prices (IRPs) to calculate the Median Price  
50 178 Ratios (MPRs). The IRPs were obtained from Management Sciences for Health (MSH) drug price  
51 179 indicator guide 2015[18]. An MPR of greater than 1 for public sector and greater than 2 for private  
52 180 sector would lodge any medicine into high priced medicines category [7]. For comparing the prices  
53 181 between two years, the MUPs from 2019 were deflated by 3.33%, taking 2017 as base year. 70%  
54 182 of the CPI was used for calculating this deflation factor, because the medicine prices can be

183 increased annually by 70% of the CPI as per NDPP 2018 [19]. Whereas MPR was calculated as  
184 follows:

185  $Median\ Price\ Ratio(MPR) = Median\ local\ unit\ price/International\ reference\ unit\ price$

186 *Affordability* for treatment of different common diseases with selected medicines was  
187 calculated and compared in terms of Number of Days Wages (NDWs) required for a lowest paid  
188 government employee to get the standard treatment courses. Whereas, if a patient had to spend  
189 more than one day of his wage for treatment with a specific medicine in a month, that medicine  
190 was considered unaffordable [13]. For affordability comparison, NDWs in two years, the prices in  
191 2019 were not deflated because the salary has also been increased in 2019. So, the salary of the  
192 lowest paid unskilled government worker was taken as 14000PKR per month (2016-17) and  
193 15000PKR per month (2018-19) [20].

194 *Comparative analysis:* Two patient prices were required to be included in the comparative  
195 analysis, one from 2017 and other from 2019. The difference in prices, availability and  
196 affordability were computed as percentage changes for each product. The mean availability and  
197 MUPs were also compared between different categories of medicines (NEML and non-NEML  
198 medicines; global and supplementary medicines; medicines for IDs and NCDs) across the years.  
199 We compared affordability in terms NDWs to get the standard treatment from the surveyed  
200 medicines. These were also compared among medicines for different disease groups (asthma,  
201 cardiovascular diseases, infectious diseases, brain disorders, diabetes, ulcer and arthritis; IDs and  
202 NCDs). To identify whether the difference between MUPs, MPRs and NDWs was significant  
203 across two years, we used Wilcoxon signed rank test. We took  $p < 0.01$  as an indicator of significant  
204 difference in all the statistical testing.

## 205 **Patient and Public Involvement**

206 Patients or the public were not involved in the design, or conduct, or reporting, or  
207 dissemination of this study.

## 208 **Results**

### 209 **Availability of medicines**

210 The overall availability of surveyed medicines was improved in 2019 when compared with 2017,  
211 except for LPGs in public sector, where it demonstrated reduction.

212 *Availability in Public Sector:* In public sector, the availability of both OBs and LPGs was  
213 poor in both years. None of the mean availabilities touched the benchmark of 80%. The mean  
214 percent availability of OBs improved from 6.8% to 33.1% whereas, in case of LPGs it reduced  
215 from 35.1% to 9%. The individual percent availabilities of each medicine (OB and LPG) are given  
216 in table S1. For better understanding of the data, we have used the data visualization tool in R and  
217 plotted a box plot of the data as shown in figure 1. The box plot showed distributional  
218 characteristics of the percent availability of medicines in two groups (OB and LPG) for the years  
219 2017 and 2019. The mean percent availability is represented by the dot inside the box. In 2017,  
220 availabilities of 75% of the OBs in public sector were less than 11.2% as shown by the 3<sup>rd</sup> quartile

221 or the upper bar of the 1<sup>st</sup> box plot. Whereas, in 2019, 75% of the OBs had availabilities higher  
 222 than 6.3% which is almost equivalent to the mean percent availability (6.8%) in 2017. This  
 223 indicates a substantial increase in the availability of OBs in public sector. In 2019, 75% of the  
 224 LPGs had availability less than 12.5% (3<sup>rd</sup> quartile) whereas before the implementation of the  
 225 NDPP 2018, 75% of the LPGs had availabilities greater than 14.3% (1<sup>st</sup> quartile). This showed a  
 226 remarkable decrease in the availability of LPGs in public sector in 2019.

227 *Availability in private sector:* In both years, the overall availability was better in private sector  
 228 than the public sector. Mean percent availability of both OBs and LPGs were improved in 2019  
 229 i.e. 55.0% to 58.3% and 20.3% to 32.3%, respectively. Availability of LPGs was less than OBs in  
 230 both years. For OBs, the mean percent availability improved slightly by 3.3% while data  
 231 distribution remained almost the same across the years, as shown in the box plot (figure 1). For  
 232 LPGs, a substantial increase in the availability was observed in terms of mean percent availability,  
 233 maximum value and change in data distribution (figure 1). In 2017, the IQR (range between upper  
 234 and lower bar of the box) for percentage availability of LPGs ranged from 6% to 31% whereas it  
 235 got improved in 2019 and ranged from 6% to 50%.

236 *Availability in different subgroups of medicines:* When we compared availability of LPGs  
 237 and OBs in different subgroups of medicines as shown in table 1, we found that mean percent  
 238 availabilities of all global list medicines were higher than supplementary medicines in both years.  
 239 Similarly, the availability of NEML medicines were higher than non-NEML medicines except for  
 240 the non-NEML LPGs in public sector, which were higher than NEML LPGs (19.2% vs 8.1%). In  
 241 2017, in public sector, the availability of OBs for NCD medicines (6.7%) were lower than OBs for  
 242 ID medicines (7.7%) whereas the availability of LPGs (35.9%) were better than LPGs of ID  
 243 medicines (33%). Surprisingly, in 2019, the situation inversed completely for NCD medicines,  
 244 increased and decreased availability of OBs (33.2%) and LPGs (33.1%), respectively, whereas,  
 245 the availability decreased for LPGs (8.8%) and increased for OBs (9.5%) for ID medicines.

246 **Table 1.** Mean Percent Availabilities of Originator Brands (OBs) and Lowest Price Generics  
 247 (LPGs) at both public and private sectors.

|                                                | Availability in 2017<br>(Mean, SD) ,% |                |                |                | Availability in 2019<br>(Mean, SD) ,% |                |                |                | Change in mean percent<br>availability (%) |       |                |      |
|------------------------------------------------|---------------------------------------|----------------|----------------|----------------|---------------------------------------|----------------|----------------|----------------|--------------------------------------------|-------|----------------|------|
|                                                | Public Sector                         |                | Private Sector |                | Public Sector                         |                | Private Sector |                | Public Sector                              |       | Private Sector |      |
|                                                | OBs                                   | LPGs           | OBs            | LPGs           | OBs                                   | LPG            | OBs            | LPG            | OB                                         | LPGs  | OB             | LPG  |
| <b>All medicines<br/>(n=50)</b>                | 6.8<br>(10.4)                         | 35.1<br>(23.6) | 55<br>(31.1)   | 20.3<br>(14.4) | 33.1<br>(27.8)                        | 9<br>(14.9)    | 58.3<br>(32.3) | 32.3<br>(26)   | 26.3                                       | -26.1 | 3.3            | 12   |
| <b>Global<br/>Medicines<br/>(n=14)</b>         | 11.2<br>(15.2)                        | 50.1<br>(32.1) | 64.3<br>(22.5) | 25.9<br>(14.5) | 48.4<br>(31.5)                        | 14.3<br>(19.9) | 66.5<br>(31.2) | 43.8<br>(27.8) | 37.2                                       | -35.8 | 2.2            | 17.9 |
| <b>Supplementar<br/>y medicines<br/>(n=36)</b> | 5<br>(7.0)                            | 29.2<br>(21.4) | 51.4<br>(33)   | 18.1<br>(14)   | 27.2<br>(24.1)                        | 7<br>(12.1)    | 55<br>(32.6)   | 27.8<br>(24.1) | 22.2                                       | -22.3 | 3.6            | 9.7  |

|                                 |               |                |                |                |                |               |                |                |      |       |      |      |
|---------------------------------|---------------|----------------|----------------|----------------|----------------|---------------|----------------|----------------|------|-------|------|------|
| <b>NEML medicines (n=46)</b>    | 7.2<br>(10.7) | 35.5<br>(26)   | 55.3<br>(31)   | 20.7<br>(14.6) | 33.9<br>(28.1) | 8.1<br>(15.1) | 58.4<br>(32.9) | 33.3<br>(26.3) | 26.7 | -27   | 3.1  | 12.6 |
| <b>Non-NEML medicines (n=4)</b> | 1.8<br>(3.0)  | 35.5<br>(34)   | 51.6<br>(36)   | 15.6<br>(11)   | 24.8<br>(25)   | 19.2<br>(7)   | 56.3<br>(28)   | 20.3<br>(21)   | 23   | -16   | 4.7  | 4.7  |
| <b>NCD medicines (n=36)</b>     | 6.4<br>(9.2)  | 35.9<br>(25.5) | 55.7<br>(28.8) | 20<br>(14.3)   | 33.2<br>(27)   | 8.8<br>(14)   | 62.3<br>(29.3) | 31.3<br>(25)   | 26.8 | -27.1 | 6.6  | 11.1 |
| <b>ID medicines (n=14)</b>      | 7.7<br>(13.3) | 33<br>(29)     | 53.1<br>(37.3) | 21<br>(15)     | 33.1<br>(30.5) | 9.5<br>(17.4) | 47.8<br>(38.1) | 34.8<br>(29.2) | 25.4 | -23.5 | -5.3 | 13.8 |

Where, SD refers to Standard deviation, NEML refers to National Essential Medicine List, NCD refers to Non Communicable Diseases and ID refers to Infectious Diseases.

*Availability at different levels of healthcare:* When we compared the availability at different levels of public healthcare sectors i.e. primary, secondary and tertiary, the availability of OBs improved in 2019, while it was decreased for LPGs. The pattern of overall medicines availability remained almost the same as of 2017 i.e. tertiary care>secondary care>primary care as shown in table S2.

## Medicine Prices

An overall increase was noted in all adjusted MUPs and adjusted MPRs between 2017 and 2019 for both OBs and LPGs as shown in Table 2. In 2019, for all 42 available OBs, the adjusted MUPs and MPRs significantly increased by a median of 4.3% (Wilcoxon test  $p=0.001$ ,  $p=0.0001$ ). Whereas in case of all 37 available LPGs, the adjusted MUPs and MPRs were increased by a median of 15.7% ( $p=0.002$ ,  $p=0.0002$ ). The MPRs of OBs ranged from 0.58 to 60.62 in 2017 and 0.73 to 77.59 in 2019. 63% of the OBs had MPR of more than 2 in 2017. Whereas, in 2019 almost 75% of the OBs had MPR greater than 2. The MPRs of LPGs ranged from 0.42 to 19.95 in 2017 and 0.39 to 19.89 in 2019. For LPGs in 2017, the median value of MPR was less than 2 (i.e. 1.36) while in 2019 this median value became greater than 2 (i.e. 2.26). Which means many LPGs which were previously affordable got shifted to the high priced medicines category in 2019. The MUPs and MPRs for all OBs is given in table S3 and for all LPGs is given in table S4.

**Table 2.** Median price ratios (MPRs) and median unit prices (MUPs) of originator brands (OBs) and lowest price generics (LPGs) in private sector among different subgroups across the years 2017 and 2019.

|                                | Originator Brands (OBs) |          |                |                         |                                   |
|--------------------------------|-------------------------|----------|----------------|-------------------------|-----------------------------------|
|                                | MPR-2017                | MPR-2019 | MUP 2017 (PKR) | Adjusted MUP 2019 (PKR) | Median percent change in MUPs/MPR |
| All medicines (n=42)           | 2.5                     | 3.2      | 6.99           | 8.49                    | 4.29%                             |
| Global Medicines (n=13)        | 2.8                     | 3.2      | 7.66           | 8.22                    | 3.35%                             |
| Supplementary medicines (n=29) | 2.5                     | 3.3      | 6.38           | 10.1                    | 5.1%                              |

|                                   |                      |                      |                               |                                        |                                                 |
|-----------------------------------|----------------------|----------------------|-------------------------------|----------------------------------------|-------------------------------------------------|
| NEML medicines<br>(n=39)          | 2.4                  | 3.3                  | 6.38                          | 8.51                                   | 5.1%                                            |
| Non-NEML medicines<br>(n=3)       | 3                    | 3.2                  | 7.66                          | 8.22                                   | 1.93%                                           |
| NCD medicines<br>(n=36)           | 2.6                  | 3.3                  | 6.19                          | 7.83                                   | 3.35%                                           |
| CD medicines<br>(n=10)            | 2.3                  | 2.9                  | 24.3                          | 31.2                                   | 7.36%                                           |
| Lowest Price Generics (LPGs)      |                      |                      |                               |                                        |                                                 |
|                                   | <b>MPR-<br/>2017</b> | <b>MPR-<br/>2019</b> | <b>MUP<br/>2017<br/>(PKR)</b> | <b>Adjusted<br/>MUP<br/>2019 (PKR)</b> | <b>Median<br/>percent change<br/>in MPR/MUP</b> |
| All medicines<br>(n=37)           | 1.4                  | 2.3                  | 5.8                           | 6.29                                   | 15.7%                                           |
| Global<br>Medicines<br>(n=13)     | 1.6                  | 2.7                  | 5.8                           | 6.56                                   | 19.2%                                           |
| Supplementary medicines<br>(n=24) | 1.3                  | 2.2                  | 5.9                           | 6.04                                   | 14.8%                                           |
| NEML medicines<br>(n=34)          | 1.4                  | 2.2                  | 5.4                           | 6                                      | 15.8%                                           |
| Non-NEML medicines<br>(n=3)       | 2.5                  | 2.7                  | 6.5                           | 6.7                                    | 3.97%                                           |
| NCD medicines<br>(n=26)           | 1.2                  | 2.2                  | 4.1                           | 5.4                                    | 16.3%                                           |
| CD medicines<br>(n=11)            | 1.8                  | 2.4                  | 8.4                           | 10.9                                   | 14.8%                                           |

270 Where PKR is Pakistani Rupee.

271 The price data was also analyzed in different subgroups as shown in table 2. There was an  
 272 increase in MUPs and MPRs for OBs of supplementary list of medicines compared to medicines  
 273 from global list (5.5% vs 3.35%). However, it was inverse in case of LPGs, i.e. the prices of global  
 274 medicines increased compared to supplementary medicines (19.2% vs 14.8%). Increment in prices  
 275 of NEML medicines was more as compared to non-NEML medicines. Next, we compared  
 276 medicines used for NCDs and IDs. Data suggested that the increase in the MUPs and MPRs of  
 277 OBs for IDs was significant in comparison to NCDs (11.2% vs 7.36%). Whereas it was the  
 278 opposite case for LPGs, where the increase was greater for NCD than ID medicines (16.3% vs  
 279 14.8%). It is also noteworthy that increase in prices for LPGs is more significant than OBs for all  
 280 subgroups of medicines.

### 281 **Affordability**

282 Between 2017 and 2019, the median NDWs required for treatment with all OBs (n=36)  
 283 increased from 1.05 to 2 and 0.5 to 0.7 for all LPGs (n=31), respectively. In 2019, the median  
 284 percent increase in NDWs for LPGs (n=31) was much higher as compared to OBs (n=36) i.e.  
 285 12.5% (p=0.008) and 3% (p=0.081) respectively. So, an overall increase in NDWs for both OBs  
 286 and LPGs was observed between 2017 and 2019. Similarly the Median Treatment Prices (MTPs)  
 287 for OB and LPGs also increased significantly i.e. 464 PKR to 563 PKR (p<0.001) and 244 PKR

288 to 350 PKR ( $p < 0.001$ ), respectively. The MTPs and NDWs for each medicine are given in  
289 supplementary tables S5 and S6. The medicines were categorized into seven disease groups to  
290 further analyze the changes in affordability between 2017 and 2019. In figure 2, a bar graph shows  
291 Median NDWs required for both OBs and LPGs in each disease group and the values above 1 are  
292 considered unaffordable. In 2017, the median NDWs of OBs to treat three types of diseases i.e.  
293 CVDs (1.2), diabetes (1.4) and ulcers (2.75) were more than 1. Whereas in 2019, medicines for  
294 one more disease category made its place into this list i.e. the medicines for IDs (1.18). Compared  
295 to 2017, the median NDWs for all OBs increased in 2019 except for OBs acting on Central Nervous  
296 System (CNS) and OBs to treat ulcers. The treatment for ulcer remained highly unaffordable in  
297 both years. The median NDWs for LPGs increased in 2019 for the treatment of Arthritis, CNS  
298 disorders, CVDs and IDs, while the modest decrease in median NDWs for LPGs was observed for  
299 some diseases i.e. asthma, diabetes and ulcers as shown in figure 2.

300

## 301 Discussion

302 This study gives a conscionable insight in to the effects of NDPP 2018 associated changes on  
303 medicine prices, availability and affordability in both public and private healthcare sectors of  
304 Lahore division, Pakistan. The main objective of this refined policy was to improve the access to  
305 essential medicines (EMs) and improvise rational drug pricing. Our study has shown that the  
306 overall availability of medicines improved in 2019 in comparison to 2017 i.e. before the  
307 implementation of this policy, except for the LPGs in public sector, demonstrating reduction.  
308 Overall the medicine prices were increased significantly, making majority of the EMs used for the  
309 common ailments unaffordable, with a much higher price increases for LPGs in comparison to  
310 OBs. The medicines used to treat ulcers, diabetes and CVDs remained most unaffordable in both  
311 years. Thus, it can fairly be assumed that the current pricing policy, to some extent, ensures the  
312 availability of medicines, nonetheless, significant policy refinements targeting essential medicines  
313 are pivotal in making medicine prices affordable to patients.

314 Despite improvements in the availability of medicines between 2017 and 2019, the  
315 availability of medicine remained below the optimal benchmark of 80% [13]. In public sector the  
316 availability of OBs improved remarkably probably be due to decentralization procurement of  
317 medicines in public sector. Before 2018, the medicines were procured centrally for all the public  
318 sector hospitals except for teaching hospitals, within a province. But after 2018, the medicines  
319 procurement was decentralized for public sector hospital to allow hospitals in each district a free  
320 choice to select desired manufactures, thus, ending up in the selection of more OBs than LPGs,  
321 possibly due to quality concerns about medicines. Another factor that improved medicines  
322 availability after 2018 was authorization of hospitals to acquire medicines directly without any  
323 delays. However, as practiced in the previous central supply system, the medicines were received  
324 centrally from the manufacturers before reaching the concerned hospital with considerable effect  
325 on timely availability of medicines. In both years, the mean percentage availabilities for all  
326 medicines were found higher in the private sector compared to the public sector, corroborating  
327 similar previous studies conducted in Bangladesh and Malawi in 2019 [21, 22]. The overall  
328 availability of medicines from NEML was slightly better than non-NEML medicines in both public

11

1  
2  
3 329 and private sectors. This might be attributed to the active role of DRAP in the revision and  
4 330 subsequent dissemination of the revised NEML i.e. NEML 2018 [15]. Furthermore, the public  
5 331 hospitals are encouraged to procure drugs from the latest NEML 2018 that has been standardized  
6 332 in line with WHO essential medicines model list 2017 [23]. Besides, a mobile application was  
7 333 launched in 2018 with user friendly interface to better disseminate the information on enlisted  
8 334 medicines [24]. So, the NDPP 2018, doesn't seem to be solely responsible for the availability of  
9 335 medicines.

10  
11  
12 336 Although we found some improvements in the availability of medicines, there was a  
13 337 substantial increase in medicine prices, making them inaccessible for most of the population.  
14 338 According to one estimate approximately 46 million people are living below the national poverty  
15 339 line in Pakistan (as per 2015) [8]. The increases in prices of both OBs and LPGs may fairly be  
16 340 attributable to the NDPP 2018, that allows an annual increase in the prices of scheduled drugs up  
17 341 to 70% of CPI compared to 50% of CPI as per NDPP 2015 [9, 10]. These changes in price  
18 342 calculations seems to accentuate the substantial impact on overall prices of medicines, thus,  
19 343 making them more expensive. The increase in LPGs prices were more significant as compared to  
20 344 OBs suggesting that with already expensive OBs, the price increase in LPGs would impoverish  
21 345 the overall access to medicines, imputable to the changes in formula for LPGs (new entrants) price  
22 346 calculation. According to NDPP 2018, the MRP of new entrant first generic should be fixed at  
23 347 20% less than that of OB compared with 30% less than MRP of OB as per NDPP 2015. Another  
24 348 possible variable is the prior availability of generics in the market for price calculation, where,  
25 349 according to NDPP2018, the MRP of a new entrant (LPGs) was fixed equal to the highest MRP  
26 350 of the available generics in the market, while as per NDPP2015 practice, MRP was fixed by taking  
27 351 the average of other generics in the market. Therefore, these changes in price calculating  
28 352 mechanisms might have led to higher prices of many new LPGs in the market. Hence, contrary to  
29 353 NDPP 2018's price steerage objectives, the increase in medicine prices was more distinct for  
30 354 NEML medicines as compared to non-NEML medicines.

31  
32  
33  
34  
35  
36  
37 355 Data from further analysis on affordability of standard treatment by selected OBs and LPGs  
38 356 suggested that majority of the medicines have become more unaffordable in 2019. When the  
39 357 affordability was compared for medicines of different disease groups, the three foremost  
40 358 unaffordable OBs were ones for treatment of ulcers, diabetes and CVDs. Additionally, the  
41 359 treatment for ulcers remained exceptionally unaffordable with OBs and LPGs in both years.  
42 360 Nevertheless, the treatment of CVDs and diabetes with LPGs remained affordable in 2017 but the  
43 361 NDWs for CVDs surpassed affordability threshold in 2019. Among the disease categories, NCDs  
44 362 harbor the top three unaffordable slots. It is noteworthy, that the burden of NCDs is increasing  
45 363 worldwide and is responsible for higher mortality rates than all other diseases combined [25-27].  
46 364 The CVDs, diabetes, cancer and chronic respiratory diseases are responsible for about 80% of  
47 365 these deaths [28]. Pakistan is among top 10 countries where prevalence of diabetes is very high.  
48 366 Besides, one third of Pakistanis, above 45 years of age have hypertension [29-31]. Thus, the  
49 367 unaffordability of the essential medicines for NCDs, such as CVDs and diabetes, has worse bearing  
50 368 on affordability associated therapeutic outcomes that ultimately leads to increased morbidity and  
51 369 mortality due to un-controlled disease.



370 Additionally, we also compared the median drug prices in 2019 with the prices  
 371 published/allowed by DRAP in its latest Statutory Regulatory Orders (SROs). DRAP revised and  
 372 published the maximum retail prices (MRPs) of about 1084 drugs on December 31, 2018 through  
 373 SRO-1608, SRO-1609 and SRO-1610 [32]. Eighteen OBs from our study sample were part of  
 374 these price revisions (table 3). Surprisingly, after comparing the MUPs of 18 selected OBs with  
 375 prices allowed by the government, we found that most of the OBs, 14 out of 18, were sold at higher  
 376 prices than the allowable prices – with median percent increase of 29.37%. These data suggested  
 377 that these intentional malpractices by the drug sellers might be driven by poor price control  
 378 regulation by price enforcement authorities. Therefore, the current drug pricing policy NDPP 2018,  
 379 is not the sole reason for the price hike. Most probably main stakeholders in the drug supply chain  
 380 are also contributing towards medicine inflated prices. Thus, it's reasonable to deduce that these  
 381 factors may interfere with measuring the direct impact of current pricing policy.

382 **Table 3.** Maximum retail unit prices (MRPs) of Originator Brands (OBs) allowed by the  
 383 government versus median unit prices (MUPs) found in private sector pharmacies.

| Medicine Name            | Strength (Dosage form) | Allowed Unit Price (PKR) | MUP 2019 (PKR) | Percentage difference |
|--------------------------|------------------------|--------------------------|----------------|-----------------------|
| Aciclovir                | 200mg (tab)            | 52.6                     | 75             | 42.5%                 |
| Amlodipine               | 5mg (tab)              | 8.5                      | 13             | 52.9%                 |
| Amoxicillin              | 250mg (cap)            | 3.75                     | 3.75           | 0%                    |
| Amoxicillin              | 500mg (cap)            | 5.58                     | 8.75           | 56.8%                 |
| Atorvastatin             | 20mg (cap)             | 141.37                   | 203.5          | 43.9%                 |
| Bisoprolol               | 5mg (tab)              | 15.35                    | 16.72          | 8.9%                  |
| Carbamezipine            | 200mg (tab)            | 4                        | 5              | 25%                   |
| Ceftriaxone              | 1g (inj)               | 783                      | 783            | 0%                    |
| Ciprofloxacin            | 500mg (tab)            | 39.25                    | 52.5           | 33.7%                 |
| Digoxin                  | 0.25mg (tab)           | 1.75                     | 2.68           | 53.1%                 |
| Fluconazole              | 200mg (cap)            | 425                      | 585            | 37.6%                 |
| Insulin N                | 100IU (vial)           | 88.47                    | 75.88          | -14.2%                |
| Insulin R                | 100IU (vial)           | 93.88                    | 75.88          | -19.1%                |
| Methyldopa               | 250mg (tab)            | 7.71                     | 8.1            | 5.05%                 |
| Omeprazole               | 20mg (cap)             | 42.9                     | 52.29          | 21.8%                 |
| Propranolol              | 40mg (tab)             | 1.1                      | 3.16           | 187.2%                |
| Pyremethamine+Sulfadoxim | (25+500)mg (tab)       | 12.01                    | 12.02          | 0.08%                 |
| Simvastatin              | 20mg (cap)             | 47.01                    | 68             | 44.6%                 |
| Medians                  |                        | 27.3                     | 34.505         | 29.3%                 |

384  
 385 Although the formation of a national scale pricing policy is laudable but it seems to be a  
 386 collection of drug price calculation formulas only. It could also include the mechanism for price  
 387 monitoring, an aspect which seems to be one of the major reasons behind failure to achieve the

goals of NDPP 2018. Inclusion of WHO/HAI based surveys on regular basis could also be an option, in this case. The WHO has developed a mobile application named “WHO Essential Medicines and Health Products Price and Availability Monitoring (WHO EMP MedMon)”, which can be used to collect and analyze price and availability data from health care outlets. This application is based on standard WHO/HAI methodology and it can be used both online and offline, make it both time saving and cost effective [33]. The drug inspectors or a third party can be given this responsibility to monitor and report the prices using WHO EMP MedMon on a regular basis, ensuring the compliance by drug manufacturers and sellers to NDPP. There could be many other policy implications having an impact on drug pricing, availability and affordability. The procurement of medicines should be strictly based on the NEML. Clear cut mechanism for NEML based procurement should be devised and implemented specially in the public sector hospitals. Besides this, the hospital pharmacy and therapeutics committees must actively evaluate the safety, efficacy and cost-effectiveness of drugs before purchasing. Pharmaco-economic evaluations of drugs must be promoted by allocating research funds to experts. Not all drugs should be fully reimbursed in the hospitals, only essential medicines must be included in this list. Hence, the profits from other drugs can be used to purchase essential drugs when needed. Smooth functioning of the drug supply chain with proper quality control must be ensured. The current inflated prices would have a grave impact on the access to essential medicines, especially for the lower and middle income population in Pakistan. Thus, there is dire need to develop clearer evidence based and stringent price control policy, especially for essential medicines. Exempting or reducing taxes and tariffs on EMs and promotion of local generic manufacture by providing subsidies on raw materials may improve both the availability and affordability of these medicines. While using the External Reference Pricing (ERP) mechanism, the reference countries should be chosen critically e.g. countries with similar pharmaceutical market and economic status. For costly medicines, regressive markups must be encouraged over progressive markups. The drug prices must be monitored on regular basis using a validated and well-designed scientific methodology and pricing policy must be revised based on such evidences. The essential medicines for most prevalent diseases such as diabetes and CVDs must be preferentially made affordable by devising some specific pricing strategies for these medicines. Besides, efforts must be made to enforce the pricing policy effectively by introducing reward and punishment system to induce a healthy competition among the drug manufacturers and sellers.

Although, this study provides an objective evidence to the policy makers for improving the current pricing policies. It has some limitations as well. The study includes medicines with specific strengths and dosage forms to compare with IRPs. There might be other strengths/dosage forms of the surveyed medicines, available in the health facilities, so the availability of the medicines may be under estimated. The affordability was calculated for single medicine for each disease, whereas patients are usually taking more than one drug at a time – under-estimating the extent of affordability of a specific treatment for a specific disease. Moreover, the post survey was conducted after about a year from the launch of new drug pricing policy 2018, so the results do not reflect the long term impact of the policy. Further surveys could be conducted in future to gauge the long term effects of the policy as it was done by Fang et al in two such surveys conducted after the health reform in China [17].

430 In Conclusion, the availability of medicines has been improved after the launch of a new drug  
431 pricing policy by Pakistani government but it is still poor, forcing the patients to buy medicines  
432 from private sector at their own expense. The prices of both LPGs and OBs of EMs have increased  
433 remarkably in 2019, when compared with 2017. The medicines to treat most prevalent non-  
434 communicable diseases (diabetes and CVDs) have become more expensive and unaffordable. The  
435 maximum retail prices of several originator brands have been illegally increased in the market,  
436 adding more burden on patients' pockets. The pricing policy needs to be improved further to bring  
437 a strict price control, especially on the EMs and on the medicines for most prevalent diseases.

## 438 **Acknowledgements**

439 We are thankful to Dr. Margaret Ewen, Senior projects manager, medicine prices at Health Action  
440 International (HAI), for helping us in designing the study. We are also grateful to Dr. Hira Azhar  
441 for editing this manuscript. We would like to acknowledge the pharmacists from surveyed  
442 institutions, data collectors and partners from research area who made this research possible.

## 443 **Contributions**

444 AS, ZB and YF conceptualize the study. ZS, HS, AS and ZB designed methodology. ZS, HS, AS  
445 trained the data collectors and obtained the data. YF provided resources and supervised the project.  
446 ZS worked as survey area manager. MA, AHG, NA, FK and MZ did data cleaning, validation and  
447 entry. AS, HS, CY, MJ analyzed the data. AS and HS wrote original draft. YF, ZB, ZS, CY and  
448 MJ, WJ reviewed and edited the manuscript.

449 **Funding** This work was funded by the “Young Talent Support Plan”, “High Achiever Plan” of  
450 Health Science Center, Xi’an Jiaotong University, and the Central University Basic Research Fund  
451 (2015qngz05).

## 452 **Competing Interests**

453 None

## 454 **Patient Consent for Publication**

455 Not Required

## 456 **Ethics Approval**

457 Ethics approval was obtained from the Medical Ethics Committee of Xi’an Jiaotong University  
458 under study ID 2019-067.

## 459 **Data availability statement**

460 Further data will be available upon reasonable request from the first author (<https://orcid.org/0000-0002-4144-9272>).

462

463

464

## References

1. United Nations Development Group, United Nations. Statistical Division. Indicators for monitoring the millennium development goals: definitions, rationale, concepts and sources. United Nations Publications 2003:95.
2. World Health Organization. Medicine prices and access to medicines in the Eastern Mediterranean Region. 2007.
3. Lee KS, Shahidullah A, Zaidi ST, *et al*. The Crux of the Medicine Prices' Controversy in Pakistan. *Frontiers in pharmacology* 2017;8:504.
4. Kiani A, Qadeer A, Mirza Z, *et al*. Prices, availability and affordability of medicines in Pakistan. Geneva: Health Action International (HAI); 2006.
5. Zaidi S, Bigdeli M, Aleem N, *et al*. Access to essential medicines in Pakistan: policy and health systems research concerns. *PloS One* 2013;8:e63515.
6. Cameron A, Ewen M, Ross-Degnan D, *et al*. Medicine prices, availability, and affordability in 36 developing and middle-income countries: a secondary analysis. *The Lancet* 2009;373:240.
7. Saeed A, Saeed H, Saleem Z, *et al*. Evaluation of prices, availability and affordability of essential medicines in Lahore Division, Pakistan: A cross-sectional survey using WHO/HAI methodology. *PloS One* 2019;14:e0216122.
8. The World Bank. Poverty and Equity data portal. 2015. Available: <http://povertydata.worldbank.org/poverty/country/PAK>. [Accessed: 16 June 2019].
9. Costing and Pricing Division, Drug Regulatory Authority of Pakistan. Drug Pricing Policy 2015.
10. Costing and Pricing Division, Drug Regulatory Authority of Pakistan. Drug Pricing Policy 2018.
11. Durrani F. Increase in drug prices highest in last 40 years. The News 2019. Available: <https://www.thenews.com.pk/print/454864-increase-in-drug-prices-highest-in-last-40-years>. [Accessed: 3 September 2019].

- 1  
2  
3 491 12. Junaidi I. Minister orders crackdown on firms increasing medicine prices. DAWN  
4 492 News 2019. Available: <https://www.dawn.com/news/1473573>. [Accessed: 3  
5 493 September 2019].  
6  
7  
8 494 13. World Health Organization. Measuring medicine prices, availability, affordability and  
9 495 price components 2008.  
10  
11 496 14. Pakistan Bureau of Statistics. Population Census. 2017. Available:  
12 497 <http://www.pbs.gov.pk/content/population-census>. [Accessed: 18 August 2019].  
13  
14 498 15. Drug Regulatory Authority of Pakistan. National Essential Medicines List. 2018.  
15  
16 499 16. Yang H, Dib HH, Zhu M, *et al*. Prices, availability and affordability of essential  
17 500 medicines in rural areas of Hubei Province, China. *Health policy and planning*  
18 501 2009;25:219.  
19  
20 502 17. Fang Y, Wagner AK, Yang S, *et al*. Access to affordable medicines after health reform:  
21 503 evidence from two cross-sectional surveys in Shaanxi Province, western China. *The*  
22 504 *Lancet Global Health* 2013;1:e227.  
23  
24 505 18. Management Sciences for Health. International Medical Products Price Guide 2015.  
25  
26 506 19. Pakistan Bureau of Statistics, Government of Pakistan. Price Statistics. Available:  
27 507 [http://www.pbs.gov.pk/content/officially-published-consumer-prices-data-imf-](http://www.pbs.gov.pk/content/officially-published-consumer-prices-data-imf-template)  
28 508 [template](http://www.pbs.gov.pk/content/officially-published-consumer-prices-data-imf-template). [Accessed 18 August 2019].  
29  
30 509 20. Wage Indicator Foundation. Minimum wages in Pakistan 2018. Available:  
31 510 <https://wageindicator.org/Wageindicatorfoundation>. [Accessed 15 April 2019].  
32  
33 511 21. Kasonde L, Tordrup D, Naheed A, *et al*. Evaluating medicine prices, availability and  
34 512 affordability in Bangladesh using World Health Organisation and Health Action  
35 513 International methodology. *BMC health services research* 2019;19:383.  
36  
37 514 22. Khuluza F, Haeefele-Abah C. The availability, prices and affordability of essential  
38 515 medicines in Malawi: A cross-sectional study. *PloS One* 2019;14:e0212125.  
39  
40 516 23. Jabri P. National essential medicine list -2018 to be implemented in all provinces:  
41 517 Kiani. Business Recorder 2018. Available:  
42 518 [https://www.brecorder.com/2018/10/06/444080/national-essential-medicine-list-](https://www.brecorder.com/2018/10/06/444080/national-essential-medicine-list-2018-to-be-implemented-in-all-provinces-kiani/)  
43 519 [2018-to-be-implemented-in-all-provinces-kiani/](https://www.brecorder.com/2018/10/06/444080/national-essential-medicine-list-2018-to-be-implemented-in-all-provinces-kiani/) . [Accessed: 3 September 2019].  
44  
45  
46  
47  
48  
49  
50  
51  
52  
53  
54  
55  
56  
57  
58  
59  
60

- 1  
2  
3 520 24. Govt. launches WHO backed national essential medicine list. Pakistan Today 2018.  
4 Available: [https://www.pakistantoday.com.pk/2018/10/05/govt-launches-who-](https://www.pakistantoday.com.pk/2018/10/05/govt-launches-who-backed-national-essential-medicine-list/)  
5 521 [backed-national-essential-medicine-list/](https://www.pakistantoday.com.pk/2018/10/05/govt-launches-who-backed-national-essential-medicine-list/). [Accessed: 3 September 2019].  
6 522  
7  
8 523 25. Dans A, Ng N, Varghese C, *et al*. The rise of chronic non-communicable diseases in  
9 southeast Asia: time for action. *The Lancet* 2011;377:680.  
10 524  
11 525 26. Siegel KR, Patel SA, Ali MK. Non-communicable diseases in South Asia:  
12 contemporary perspectives. *British medical bulletin* 2014;111:31.  
13 526  
14 527 27. Habib SH, Saha S. Burden of non-communicable disease: global overview. *Diabetes*  
15 *& Metabolic Syndrome: Clinical Research & Reviews* 2010;4:41.  
16 528  
17 529 28. World Health Organization. Global action plan for the prevention and control of non-  
18 communicable diseases 2013-2020, 2013.  
19 530  
20 531 29. Ghaffar A, Reddy KS, Singhi M. Burden of non-communicable diseases in South Asia.  
21 *BMJ* 2004;328:807.  
22 532  
23 533 30. Jafar TH, Haaland BA, Rahman A, *et al*. Non-communicable diseases and injuries in  
24 Pakistan: strategic priorities. *The Lancet* 2013;381:2281.  
25 534  
26 535 31. Wasay M, Zaidi S, Jooma R. Non communicable diseases in Pakistan: burden,  
27 challenges and way forward for health care authorities. *Journal of Pakistan Medical*  
28 *Association* 2014; 64:1218.  
29 536  
30 537 32. Drug Regulatory Authority of Pakistan. SRO: Pricing division 2018. Available:  
31 <https://www.dra.gov.pk/Home/Pricing>. [Accessed: 17 July 2019].  
32 538  
33 539 33. World Health Organization. MedMon - WHO Essential Medicines and Health Products  
34 Price and Availability Monitoring Mobile Application. 2016. Available:  
35 <https://www.who.int/medicines/areas/policy/monitoring/empmedmon/en/>  
36 540  
37 541 [Accessed: 30 March 2020].  
38 542  
39 543  
40 544  
41 545  
42  
43  
44  
45  
46  
47  
48  
49  
50  
51  
52  
53  
54  
55  
56  
57  
58  
59  
60

**Figure 1. Box plot of percent availability of lowest price generics (LPGs) and originator brands (OBs) in both public (pub) and private (pvt) sectors in 2017 and 2019.** This box plot shows the distributional characteristics of the percent availability of medicines in two groups (OB and LPG) for the years 2017 and 2019. The mean percent availability is represented by the dot inside the box.

1  
2  
3  
4  
5  
6  
7  
8  
9  
10  
11  
12  
13  
14  
15  
16  
17  
18  
19  
20  
21  
22  
23  
24  
25  
26  
27  
28  
29  
30  
31  
32  
33  
34  
35  
36  
37  
38  
39  
40  
41  
42  
43  
44  
45  
46  
47  
48  
49  
50  
51  
52  
53  
54  
55  
56  
57  
58  
59  
60

551 **Figure 2.** Bar graph of affordability of originator brands (OBs) and lowest price generics (LPGs)  
552 for different diseases in both years i.e. 2017 and 2019.

553  
554

For peer review only

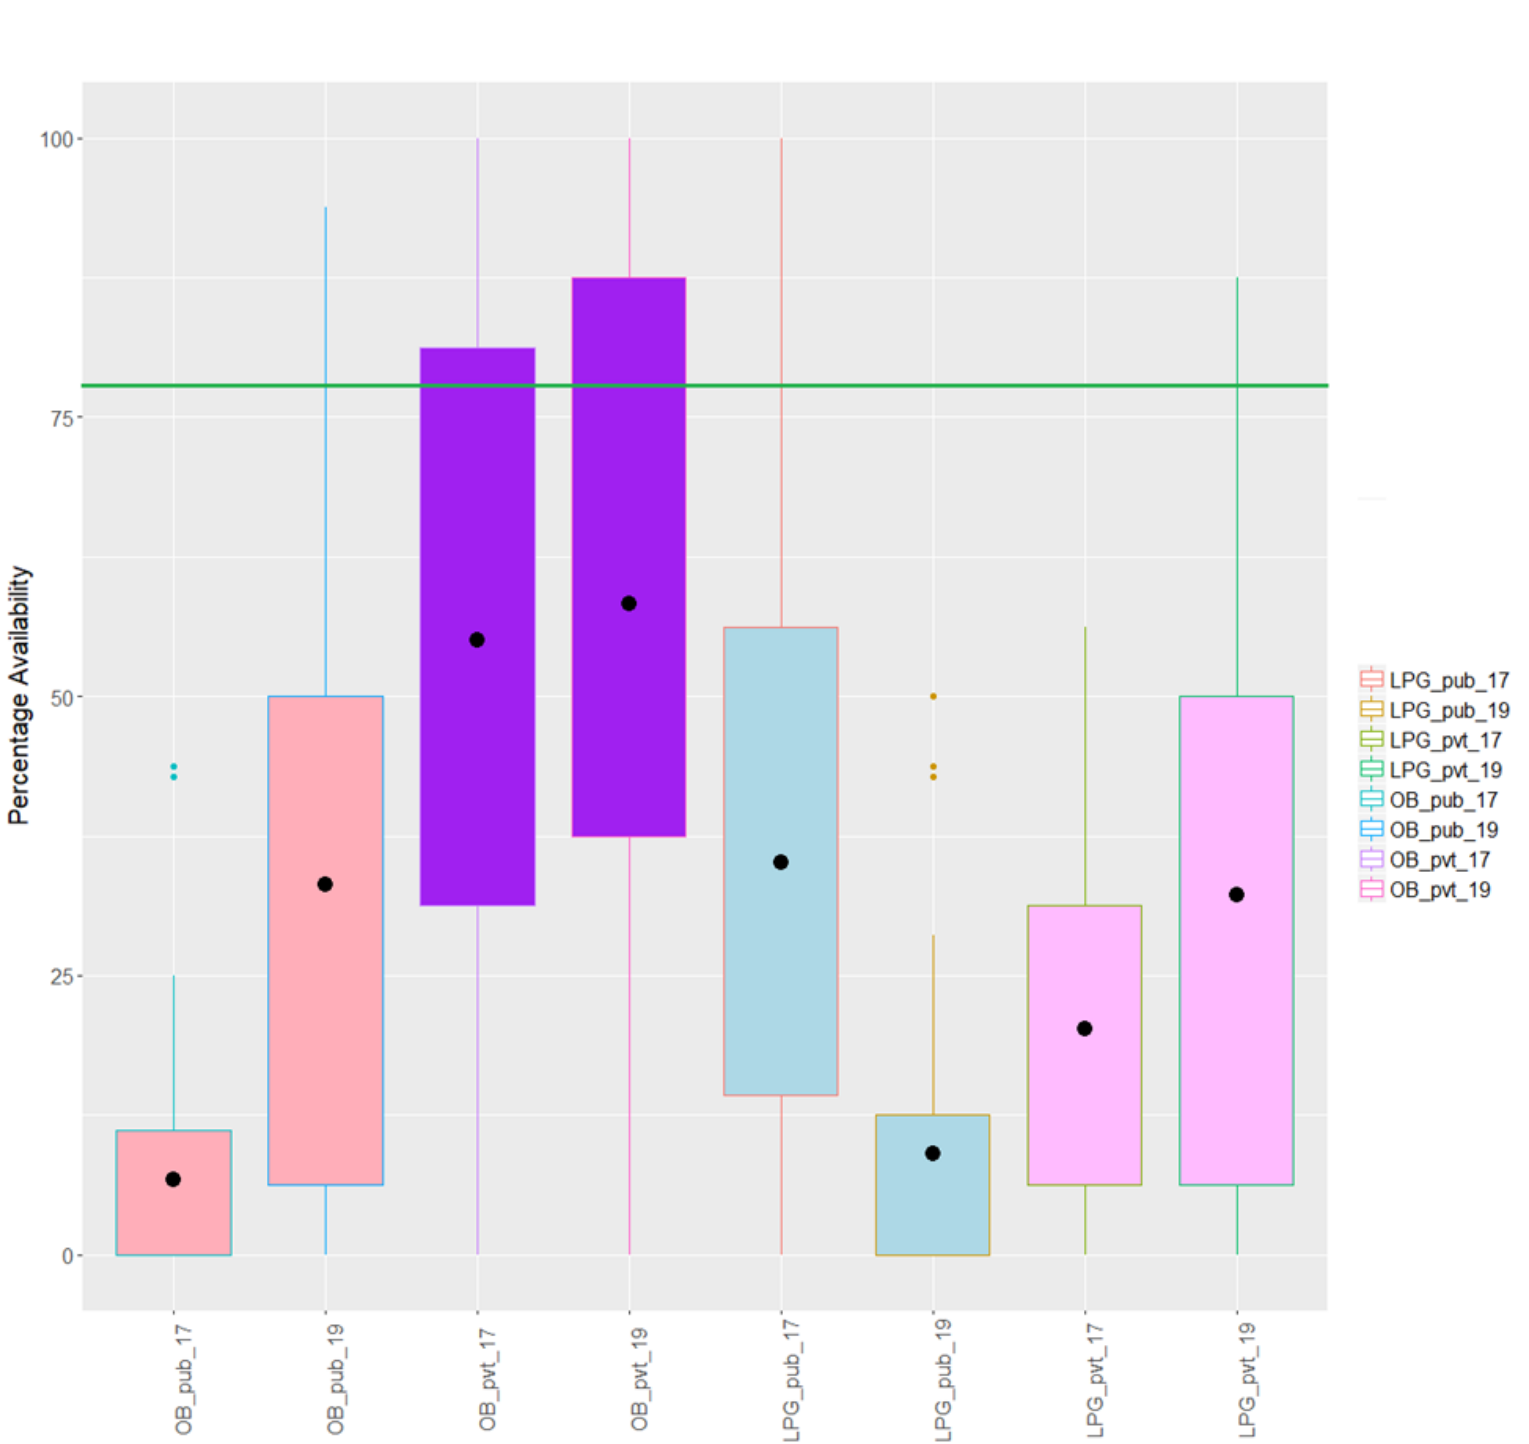



1  
2  
3  
4  
5  
6  
7  
8  
9  
10  
11  
12  
13  
14  
15  
16  
17  
18  
19  
20  
21  
22  
23  
24  
25  
26  
27  
28  
29  
30  
31  
32  
33  
34  
35  
36  
37  
38  
39  
40  
41  
42  
43  
44  
45  
46  
47  
48  
49  
50  
51  
52  
53  
54  
55  
56  
57  
58  
59  
60

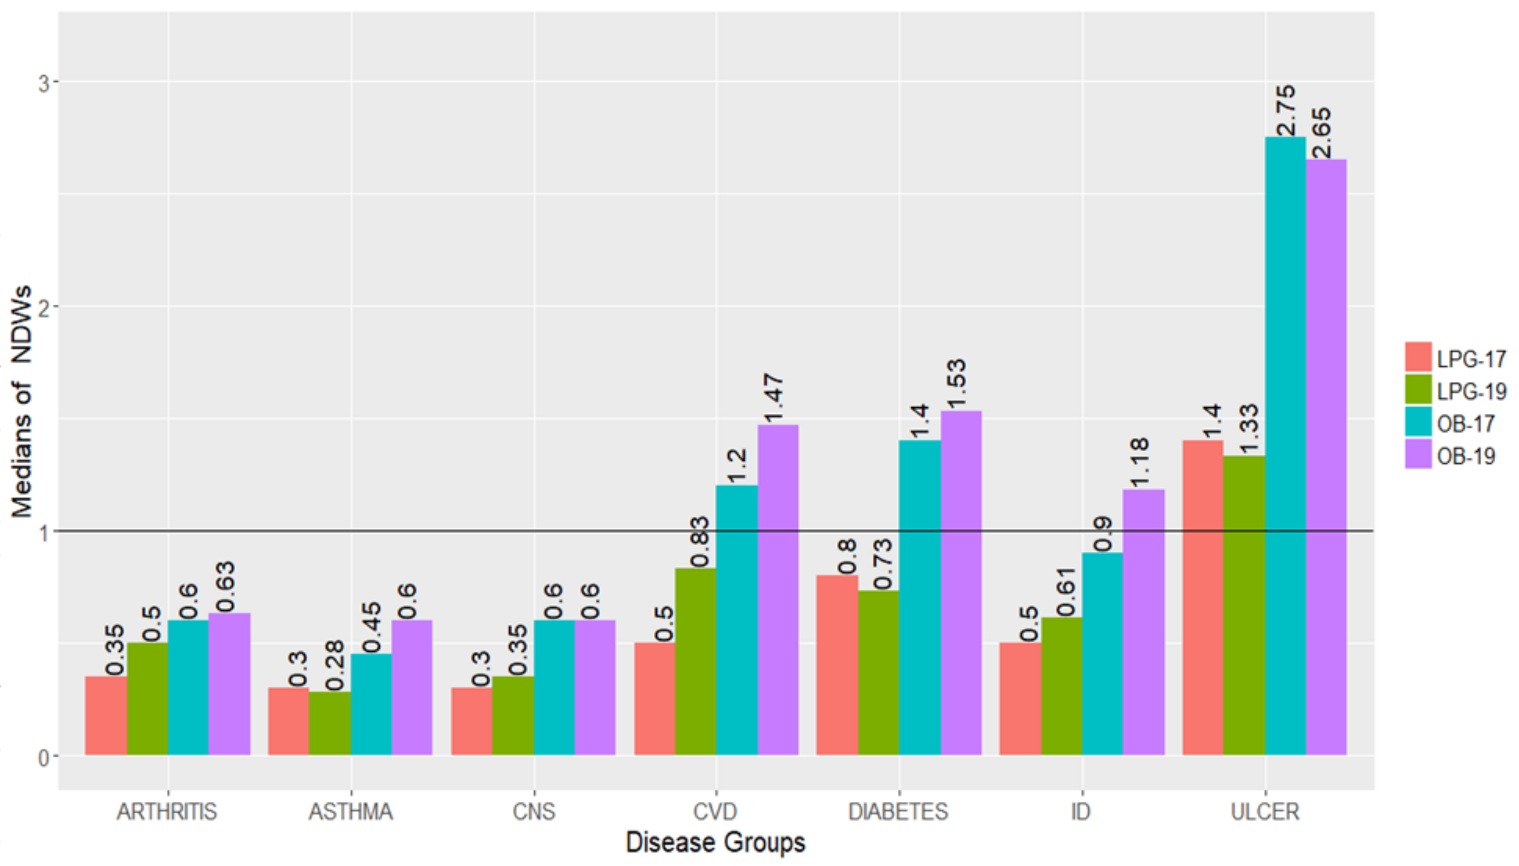

## Supplementary Tables

**Table S1.** Percent availabilities and of originator brands (OBs) and lowest price generics (LPGs) of all medicines in public and private sector in 2017 and 2019 (%)

| Names of meds                     | OB<br>(Public)<br>2017 | OB<br>(Pvt.)<br>2017 | LPG<br>(Public<br>) 2017 | LPG<br>(Pvt.)<br>2017 | OB<br>(Public<br>) 2019 | OB<br>(Pvt)<br>2019 | LPG<br>(Public<br>) 2019 | LPG<br>(pvt.)<br>2019 |
|-----------------------------------|------------------------|----------------------|--------------------------|-----------------------|-------------------------|---------------------|--------------------------|-----------------------|
| Acetylsalicylic Acid              | 0.0                    | 25.0                 | 56.3                     | 25.0                  | 18.8                    | 75.0                | 50.0                     | 18.8                  |
| Aciclovir                         | 0.0                    | 50.0                 | 25.0                     | 37.5                  | 6.3                     | 18.8                | 0.0                      | 50.0                  |
| Amiodarone                        | 7.1                    | 62.5                 | 21.4                     | 6.3                   | 0.0                     | 62.5                | 21.4                     | 0.0                   |
| Amitriptyline                     | 0.0                    | 31.3                 | 0.0                      | 25.0                  | 0.0                     | 0.0                 | 50.0                     | 50.0                  |
| Amlodipine                        | 6.3                    | 75.0                 | 62.5                     | 31.3                  | 37.5                    | 93.8                | 12.5                     | 56.3                  |
| Amoxicillin                       | 43.8                   | 93.8                 | 18.8                     | 25.0                  | 93.8                    | 68.8                | 0.0                      | 37.5                  |
| Amoxicillin (250)                 | 18.8                   | 100.0                | 12.5                     | 31.3                  | 50.0                    | 87.5                | 0.0                      | 37.5                  |
| Atenolol                          | 12.5                   | 87.5                 | 81.3                     | 43.8                  | 43.8                    | 81.3                | 0.0                      | 56.3                  |
| Atorvastatin                      | 7.1                    | 50.0                 | 21.4                     | 25.0                  | 42.9                    | 62.5                | 21.4                     | 18.8                  |
| Azithromycin                      | 0.0                    | 25.0                 | 25.0                     | 31.3                  | 31.3                    | 25.0                | 25.0                     | 75.0                  |
| Beclometasone inhaler             | 0.0                    | 6.3                  | 35.7                     | 12.5                  | 35.7                    | 43.8                | 0.0                      | 0.0                   |
| Bisoprolol                        | 6.3                    | 87.5                 | 18.8                     | 25.0                  | 37.5                    | 81.3                | 0.0                      | 56.3                  |
| Captopril                         | 0.0                    | 81.3                 | 85.7                     | 25.0                  | 50.0                    | 93.8                | 28.6                     | 50.0                  |
| Carbamazepine                     | 12.5                   | 87.5                 | 56.3                     | 25.0                  | 25.0                    | 31.3                | 0.0                      | 56.3                  |
| Ceftriaxone injection             | 14.3                   | 68.8                 | 71.4                     | 31.3                  | 21.4                    | 75.0                | 50.0                     | 87.5                  |
| Ciprofloxacin                     | 0.0                    | 81.3                 | 100.0                    | 37.5                  | 64.3                    | 93.8                | 14.3                     | 25.0                  |
| Clarithromycin                    | 0.0                    | 87.5                 | 35.7                     | 25.0                  | 50.0                    | 93.8                | 0.0                      | 56.3                  |
| Co-trimoxazole suspension         | 6.3                    | 31.3                 | 62.5                     | 6.3                   | 6.3                     | 6.3                 | 43.8                     | 6.3                   |
| Diazepam                          | 6.3                    | 62.5                 | 12.5                     | 0.0                   | 43.8                    | 68.8                | 0.0                      | 0.0                   |
| Diclofenac                        | 42.9                   | 50.0                 | 35.7                     | 6.3                   | 85.7                    | 93.8                | 0.0                      | 81.3                  |
| Digoxin                           | 21.4                   | 62.5                 | 28.6                     | 0.0                   | 28.6                    | 68.8                | 0.0                      | 56.3                  |
| Enalapril                         | 0.0                    | 68.8                 | 62.5                     | 18.8                  | 12.5                    | 68.8                | 12.5                     | 50.0                  |
| Fluconazole                       | 0.0                    | 37.5                 | 18.8                     | 25.0                  | 43.8                    | 43.8                | 0.0                      | 50.0                  |
| Fluoxetine                        | 0.0                    | 43.8                 | 12.5                     | 43.8                  | 6.3                     | 62.5                | 6.3                      | 62.5                  |
| Fluphenazine Decanoate            | 0.0                    | 0.0                  | 0.0                      | 12.5                  | 0.0                     | 0.0                 | 7.1                      | 6.3                   |
| Furosemide                        | 12.5                   | 93.8                 | 50.0                     | 6.3                   | 50.0                    | 87.5                | 0.0                      | 0.0                   |
| Glibenclamide                     | 18.8                   | 68.8                 | 56.3                     | 12.5                  | 68.8                    | 93.8                | 0.0                      | 12.5                  |
| Gliclazide                        | 0.0                    | 75.0                 | 0.0                      | 18.8                  | 7.1                     | 75.0                | 0.0                      | 31.3                  |
| Hydrochlorothiazide               | 0.0                    | 0.0                  | 0.0                      | 12.5                  | 18.8                    | 0.0                 | 0.0                      | 0.0                   |
| Indinavir                         | 0.0                    | 0.0                  | 0.0                      | 0.0                   | 0.0                     | 0.0                 | 0.0                      | 0.0                   |
| Insulin Isophane (NPH)            | 0.0                    | 75.0                 | 50.0                     | 25.0                  | 56.3                    | 68.8                | 0.0                      | 18.8                  |
| Insulin Neutral Soluble (Regular) | 0.0                    | 68.8                 | 50.0                     | 25.0                  | 68.8                    | 68.8                | 0.0                      | 18.8                  |
| Losartan                          | 7.1                    | 43.8                 | 14.3                     | 43.8                  | 0.0                     | 43.8                | 42.9                     | 43.8                  |
| Lovastatin                        | 0.0                    | 0.0                  | 6.3                      | 0.0                   | 6.3                     | 37.5                | 12.5                     | 0.0                   |

|                                |      |      |      |      |      |       |      |      |
|--------------------------------|------|------|------|------|------|-------|------|------|
| Metformin                      | 25.0 | 81.3 | 56.3 | 31.3 | 68.8 | 93.8  | 0.0  | 50.0 |
| Methyldopa                     | 12.5 | 81.3 | 25.0 | 0.0  | 75.0 | 68.8  | 0.0  | 0.0  |
| Metronidazole                  | 25.0 | 93.8 | 56.3 | 37.5 | 75.0 | 87.5  | 0.0  | 56.3 |
| Nevirapine                     | 0.0  | 0.0  | 14.3 | 0.0  | 0.0  | 0.0   | 0.0  | 0.0  |
| Nifedipine Retard              | 0.0  | 75.0 | 28.6 | 12.5 | 0.0  | 31.3  | 14.3 | 12.5 |
| Omeprazole                     | 6.3  | 56.3 | 75.0 | 37.5 | 62.5 | 62.5  | 6.3  | 50.0 |
| Omeprazole (10)                | 0.0  | 12.5 | 43.8 | 18.8 | 18.8 | 0.0   | 12.5 | 31.3 |
| Paracetamol suspension         | 6.3  | 68.8 | 87.5 | 25.0 | 81.3 | 87.5  | 0.0  | 81.3 |
| Phenytoin                      | 0.0  | 6.3  | 12.5 | 6.3  | 0.0  | 50.0  | 6.3  | 0.0  |
| Propranolol                    | 12.5 | 68.8 | 12.5 | 6.3  | 18.8 | 87.5  | 0.0  | 25.0 |
| Pyrimethamine with sulfadoxine | 0.0  | 75.0 | 21.4 | 6.3  | 21.4 | 68.8  | 0.0  | 6.3  |
| Ranitidine                     | 0.0  | 81.3 | 31.3 | 25.0 | 50.0 | 100.0 | 0.0  | 50.0 |
| Salbutamol inhaler             | 0.0  | 81.3 | 56.3 | 31.3 | 62.5 | 68.8  | 0.0  | 12.5 |
| Simvastatin                    | 0.0  | 25.0 | 21.4 | 56.3 | 0.0  | 37.5  | 7.1  | 25.0 |
| Spirolactone                   | 6.3  | 62.5 | 25.0 | 0.0  | 12.5 | 93.8  | 6.3  | 43.8 |
| Zidovudine                     | 0.0  | 0.0  | 0.0  | 0.0  | 0.0  | 0.0   | 0.0  | 0.0  |
| Mean availabilities            | 6.8  | 55.0 | 35.1 | 20.3 | 33.1 | 58.3  | 9.0  | 32.3 |

Table (S2). Change in availability at different levels of healthcare (Public Sector).

|                                             | Primary level<br>(n=2 outlets) |                | Secondary level (n=13<br>outlets) |                | Tertiary level<br>(n=1 outlet) |                |
|---------------------------------------------|--------------------------------|----------------|-----------------------------------|----------------|--------------------------------|----------------|
|                                             | All medicines<br>(n=50)        |                | All medicines<br>(n=50)           |                | All medicines<br>(n=50)        |                |
|                                             | OB                             | LPG            | OB                                | LPG            | OB                             | LPG            |
| Mean<br>Availability<br>2017<br>(SD),%      | 0.0<br>(0.0)                   | 25.8<br>(44.5) | 7.1<br>(11.2)                     | 35.2<br>(27.5) | 12.0<br>(32.8)                 | 50.0<br>(50.5) |
| Mean<br>Availability<br>2019<br>(SD) ,%     | 21.0<br>(31.0)                 | 3.2<br>(18)    | 32.3<br>(29.1)                    | 7.4<br>(13.4)  | 68.0<br>(47.1)                 | 22.0<br>(41.8) |
| Change in mean<br>percent<br>availability,% | 21.0                           | -22.6          | 25.2                              | -27.8          | 56.0                           | -28.0          |

**Table S3.** Change in median unit prices (MUPs) and median price ratios (MPRs) of the Originator Brands (OBs) at private sector.

| Sr. no. | Medicines (OB)                    | MUPs 2017 (PKR) | MPR 2017 | Adjusted MUP in 2019 | MPR 2019 | Percentage change in MUPs/MPRs |
|---------|-----------------------------------|-----------------|----------|----------------------|----------|--------------------------------|
| 1       | Acetylsalicylic Acid              | 1.16            | 0.8      | 1.12                 | 0.7      | -3.41%                         |
| 2       | Aciclovir                         | 70              | 20       | 72.5                 | 21       | 3.48%                          |
| 3       | Amiodarone                        | 17.78           | 2.2      | 17.4                 | 2.2      | -2.15%                         |
| 4       | Amlodipine                        | 11.93           | 7.3      | 12.6                 | 7.7      | 5.1%                           |
| 5       | Amoxicillin                       | 8.616           | 2.8      | 8.46                 | 2.7      | -1.83%                         |
| 6       | Amoxicillin (250)                 | 3.56            | 2.1      | 3.63                 | 2.2      | 1.83%                          |
| 7       | Atenolol                          | 6.19            | 5.6      | 6.14                 | 5.5      | -0.81%                         |
| 8       | Atorvastatin                      | 201.9           | 18       | 197                  | 18       | -2.6%                          |
| 9       | Azithromycin                      | 40              | 1.7      | 118                  | 5        | 66.2%                          |
| 10      | Beclometasone inhaler             | 1.25            | 1.2      | 1.84                 | 1.8      | 32%                            |
| 11      | Bisoprolol                        | 11.28           | 1.2      | 16.2                 | 1.7      | 30.2%                          |
| 12      | Captopril                         | 7.66            | 3        | 8.22                 | 3.2      | 6.81%                          |
| 13      | Carbamazepine                     | 4.91            | 2.6      | 4.84                 | 2.5      | -1.55%                         |
| 14      | Ceftriaxone injection             | 672             | 16       | 757                  | 18       | 11.2%                          |
| 15      | Ciprofloxacin                     | 50.4            | 13       | 50.8                 | 13       | 0.72%                          |
| 16      | Clarithromycin                    | 65.7            | 2.5      | 76.4                 | 2.9      | 14%                            |
| 17      | Co-trimoxazole suspension         | 0.29            | 0.6      | 0.44                 | 0.9      | 33.4%                          |
| 18      | Diazepam                          | 2               | 2        | 1.93                 | 1.9      | -3.41%                         |
| 19      | Diclofenac                        | 5.625           | 12       | 5.61                 | 12       | -0.29%                         |
| 20      | Digoxin                           | 2.52            | 2.4      | 2.59                 | 2.5      | 2.76%                          |
| 21      | Enalapril                         | 5.85            | 5.4      | 6                    | 5.6      | 2.43%                          |
| 22      | Fluconazole                       | 442             | 61       | 566                  | 78       | 21.9%                          |
| 23      | Fluoxetine                        | 43.42           | 9.7      | 43                   | 9.6      | -0.9%                          |
| 24      | Furosemide                        | 1.89            | 3        | 2.34                 | 3.7      | 19.2%                          |
| 25      | Glibenclamide                     | 1.69            | 2.9      | 2.09                 | 3.5      | 19.1%                          |
| 26      | Gliclazide                        | 7.6             | 1.5      | 16.4                 | 3.3      | 53.8%                          |
| 27      | Insulin Isophane (NPH)            | 64.5            | 1.1      | 73.4                 | 1.3      | 12.1%                          |
| 28      | Insulin Neutral Soluble (Regular) | 64.5            | 1.1      | 73.4                 | 1.2      | 12.1%                          |
| 29      | Losartan                          | 51.67           | 4.3      | 50.3                 | 4.2      | -2.76%                         |
| 30      | Metformin                         | 1.54            | 1        | 1.62                 | 1        | 5.21%                          |
| 31      | Methyldopa                        | 6.38            | 1.9      | 7.83                 | 2.3      | 18.5%                          |
| 32      | Metronidazole                     | 1.57            | 1.3      | 1.52                 | 1.2      | -3.41%                         |
| 33      | Nifedipine Retard                 | 5.69            | 2.7      | 5.8                  | 2.8      | 1.93%                          |
| 34      | Omeprazole                        | 49.78           | 34       | 50.6                 | 35       | 1.55%                          |
| 35      | Paracetamol suspension            | 0.85            | 1.6      | 2.2                  | 4.1      | 61.4%                          |
| 36      | Phenytoin                         | 5.2             | 4.8      | 23.2                 | 22       | 77.6%                          |
| 37      | Propranolol                       | 1.55            | 2.2      | 3.06                 | 4.3      | 49.3%                          |

|    |                                |       |     |      |     |        |
|----|--------------------------------|-------|-----|------|-----|--------|
| 38 | Pyrimethamine with sulfadoxine | 5.83  | 1.4 | 11.6 | 2.8 | 49.8%  |
| 39 | Ranitidine                     | 8.8   | 3.7 | 8.51 | 3.6 | -3.41% |
| 40 | Salbutamol inhaler             | 1     | 1   | 1.03 | 1.1 | 3.35%  |
| 41 | Simvastatin                    | 67.13 | 12  | 65.8 | 12  | -2.09% |
| 42 | Spirolactone                   | 8.6   | 0.8 | 10.1 | 1   | 14.5%  |
|    | Medians                        | 6.99  | 2.5 | 8.49 | 3.2 | 4.29%  |

**Table S4.** Change in median unit prices (MUPs) and median price ratios (MPRs) of the lowest price generics (LPGs) in private sector.

| Sr. no. | Medicines                 | MUPs 2017 (PKR) | MPR 2017 | Adjusted MUP in 2019 | MPR 2019 | Percentage change in MUPs/MPRs |
|---------|---------------------------|-----------------|----------|----------------------|----------|--------------------------------|
| 1       | Acetylsalicylic Acid      | 1.015           | 0.7      | 1.06                 | 0.7      | 4.58                           |
| 2       | Aciclovir                 | 12.4            | 3.6      | 13.5                 | 3.9      | 8.41                           |
| 3       | Amitriptyline             | 1.19            | 1.4      | 1.24                 | 1.4      | 3.86                           |
| 4       | Amlodipine                | 1.8             | 1.1      | 6.29                 | 3.8      | 71.4                           |
| 5       | Amoxicillin               | 5.8             | 1.9      | 8.32                 | 2.7      | 30.3                           |
| 6       | Amoxicillin (250)         | 3               | 1.8      | 3.48                 | 2.1      | 13.8                           |
| 7       | Atenolol                  | 2.05            | 1.8      | 2.47                 | 2.2      | 16.9                           |
| 8       | Atorvastatin              | 37.5            | 3.4      | 35.8                 | 3.2      | -4.8                           |
| 9       | Azithromycin              | 40              | 1.7      | 19.3                 | 0.8      | -107                           |
| 10      | Bisoprolol                | 6.55            | 0.7      | 6.56                 | 0.7      | 0.1                            |
| 11      | Captopril                 | 6.5             | 2.5      | 6.77                 | 2.7      | 3.97                           |
| 12      | Carbamazepine             | 3.3             | 1.7      | 4.35                 | 2.3      | 24.2                           |
| 13      | Ceftriaxone injection     | 280             | 6.8      | 290                  | 7        | 3.48                           |
| 14      | Ciprofloxacin             | 11              | 2.8      | 24.2                 | 6.2      | 54.5                           |
| 15      | Clarithromycin            | 36              | 1.4      | 42.7                 | 1.6      | 15.8                           |
| 16      | Co-trimoxazole suspension | 0.21            | 0.4      | 2.32                 | 4.7      | 91                             |
| 17      | Diclofenac                | 3.5             | 7.5      | 4.79                 | 10       | 26.9                           |
| 18      | Enalapril                 | 2.05            | 1.9      | 2.84                 | 2.6      | 27.8                           |
| 19      | Fluconazole               | 145.5           | 20       | 145                  | 20       | -0.3                           |
| 20      | Fluoxetine                | 13.8            | 3.1      | 13.5                 | 3        | -1.9                           |
| 21      | Fluphenazine Decanoate    | 90.5            | 1        | 93.8                 | 1.1      | 3.5                            |
| 22      | Glibenclamide             | 1.57            | 2.7      | 1.42                 | 2.4      | -10                            |
| 23      | Gliclazide                | 4.75            | 0.9      | 5.8                  | 1.1      | 18.1                           |

|    |                                   |            |            |             |            |             |
|----|-----------------------------------|------------|------------|-------------|------------|-------------|
| 24 | Insulin Isophane (NPH)            | 48         | 0.8        | 62.3        | 1.1        | 22.9        |
| 25 | Insulin Neutral Soluble (Regular) | 48         | 0.8        | 62.3        | 1          | 22.9        |
| 26 | Losartan                          | 11         | 0.9        | 13.1        | 1.1        | 15.7        |
| 27 | Metformin                         | 1.5        | 1          | 1.86        | 1.2        | 19.2        |
| 28 | Metronidazole                     | 1.5        | 1.2        | 1.93        | 1.6        | 22.4        |
| 29 | Nifedipine Retard                 | 2.65       | 1.3        | 5.14        | 2.4        | 48.4        |
| 30 | Omeprazole                        | 15.35      | 10         | 11.4        | 7.8        | -35         |
| 31 | Omeprazole (10)                   | 12.14      | 0.9        | 5.13        | 0.4        | -137        |
| 32 | Paracetamol suspension            | 0.47       | 0.9        | 1.02        | 1.9        | 53.7        |
| 33 | Propranolol                       | 0.66       | 0.9        | 2.03        | 2.8        | 67.5        |
| 34 | Pyrimethamine with sulfadoxine    | 5          | 1.2        | 4.84        | 1.2        | -3.4        |
| 35 | Ranitidine                        | 6.93       | 2.9        | 7.78        | 3.3        | 11          |
| 36 | Salbutamol inhaler                | 0.64       | 0.7        | 0.68        | 0.7        | 5.45        |
| 37 | Simvastatin                       | 8.5        | 1.6        | 16.6        | 3          | 48.7        |
|    | <b>Medians</b>                    | <b>5.8</b> | <b>1.4</b> | <b>6.29</b> | <b>2.3</b> | <b>15.7</b> |

**Table S5.** Affordability of originator brands (OBs) for different diseases in 2017 and 2019, in private sector.

| Disease                        | Medicine           | Strength    | Dosage form | No. of units needed per treatment | Duration of treatment | MTP 2017 (PKR) | NDWs 2017 | MTP 2019 (PKR) | NDWs 2019 |
|--------------------------------|--------------------|-------------|-------------|-----------------------------------|-----------------------|----------------|-----------|----------------|-----------|
| <b>ASTHMA</b>                  | Salbutamol Inhaler | 100mcg/dose | Inhaler     | 200                               | As needed             | 200            | 0.4       | 214            | 0.4       |
|                                | Beclomethasone     | 50mcg/dose  | inhaler     | 200                               | As needed             | 250            | 0.5       | 380            | 0.8       |
| <b>Cardiovascular Diseases</b> | Bisoprolol         | 5mg         | tab         | 60                                | 30                    | 676.8          | 1.5       | 1003           | 2         |
|                                | Atenolol           | 50mg        | tab         | 30                                | 30                    | 185.7          | 0.4       | 190.5          | 0.4       |
|                                | Captopril          | 25mg        | tab         | 60                                | 30                    | 459.6          | 1         | 510            | 1         |
|                                | Amlodipine         | 5mg         | tab         | 60                                | 30                    | 715.8          | 1.5       | 780            | 1.6       |
|                                | Amiodarone         | 200mg       | tab         | 60                                | 30                    | 1066.8         | 2.3       | 1080           | 2.2       |
|                                | Losartan           | 50mg        | tab         | 60                                | 30                    | 3100.2         | 6.6       | 3120           | 6.2       |
|                                | methyldopa         | 250mg       | tab         | 90                                | 30                    | 574.2          | 1.2       | 729            | 1.5       |
| Nifedipine retard              | 20mg               | tab         | 90          | 30                                | 512.1                 | 1.1            | 540       | 1.1            |           |

|                                                     |                                   |          |         |     |    |        |     |       |     |
|-----------------------------------------------------|-----------------------------------|----------|---------|-----|----|--------|-----|-------|-----|
|                                                     | Spironolactone                    | 100mg    | tab     | 30  | 30 | 258    | 0.5 | 312   | 0.6 |
|                                                     | Propranolol                       | 40mg     | tab     | 90  | 30 | 139.5  | 0.3 | 284.4 | 0.6 |
|                                                     | Acetylsalicylic acid              | 75mg     | tab     | 30  | 30 | 34.8   | 0.1 | 34.8  | 0.1 |
| <b>Anti hyperlipide mics</b>                        | Simvastatin                       | 20mg     | Cap/tab | 30  | 30 | 2013.9 | 4.3 | 2040  | 4.1 |
|                                                     | Atorvastatin                      | 20mg     | Cap/tab | 30  | 30 | 6057   | 13  | 6105  | 12  |
| <b>Infections-Adult respiratory tract infection</b> | Ceftriaxone Injection             | 1g/vial  | Inj.    | 1   | 1  | 672    | 1.4 | 783   | 1.6 |
|                                                     | Ciprofloxacin                     | 500mg    | tab     | 14  | 7  | 705.6  | 1.5 | 735   | 1.5 |
|                                                     | Azithromycin                      | 500mg    | tab     | 3   | 3  | 120    | 0.3 | 367   | 0.7 |
|                                                     | clarithromycin                    | 500mg    | tab     | 28  | 14 | 1839.6 | 3.9 | 2212  | 4.4 |
|                                                     | Amoxicillin                       | 500mg    | cap     | 42  | 14 | 361.87 | 0.8 | 367.5 | 0.7 |
|                                                     | Amoxicillin                       | 250mg    | cap     | 84  | 14 | 299.04 | 0.6 | 315   | 0.6 |
| <b>Fungal Infection</b>                             | Fluconazole                       | 200mg    | cap     | 1   | 1  | 442    | 0.9 | 585   | 1.2 |
| <b>Viral Infection</b>                              | aciclovir                         | 200mg    | tab     | 25  | 5  | 1750   | 3.8 | 1875  | 3.8 |
| <b>Amoebiasis</b>                                   | metronidazole                     | 400mg    | tab     | 21  | 7  | 32.97  | 0.1 | 32.97 | 0.1 |
| <b>CNS Drugs-Anti epileptics</b>                    | Carbamezipine                     | 200mg    | tab     | 60  | 30 | 294.6  | 0.6 | 300   | 0.6 |
|                                                     | Phenytoin                         | 100mg    | tab     | 90  | 30 | 468    | 1   | 2160  | 4.3 |
| <b>Anxiety</b>                                      | diazepam                          | 5mg      | tab     | 90  | 30 | 180    | 0.4 | 180   | 0.4 |
| <b>Anti Diabetics</b>                               | Metformin                         | 500mg    | tab     | 90  | 30 | 138.6  | 0.3 | 151.2 | 0.3 |
|                                                     | Glibenclamide                     | 5mg      | tab     | 90  | 30 | 152    | 0.3 | 194.4 | 0.4 |
|                                                     | Gliclazide                        | 80mg     | tab     | 60  | 30 | 456    | 1.5 | 1020  | 2   |
|                                                     | Insulin Isophane (NPH)            | 100IU/ml | vial    | 10  | 30 | 645    | 1.4 | 758.8 | 1.5 |
|                                                     | Insulin Neutral Soluble (Regular) | 100IU/ml | vial    | 10  | 30 | 645    | 1.4 | 758.8 | 1.5 |
| <b>Ulcer Treatment</b>                              | Omeprazole                        | 20mg     | cap     | 30  | 30 | 1493.4 | 3.2 | 1569  | 3.1 |
|                                                     | ranitidine                        | 150mg    | tab     | 120 | 30 | 1056   | 2.3 | 1056  | 2.1 |
| <b>Pain/Inflammation Arthritis</b>                  | Paracetamol                       | 24mg/ml  | susp    | 45  | 3  | 38.25  | 0.1 | 102.6 | 0.2 |
|                                                     | Diclofenac                        | 50mg     | tab     | 90  | 30 | 506.25 | 1.1 | 522   | 1   |

Where, MTP: Median treatment price, NDWs: Number of days' wages

**Table S6.** Affordability of lowest price generics (LPGs) for different diseases in 2017 and 2019, in private sector.

| Disease/Condition                            | Medicine              | Strength    | Dosage form | No. of units needed per treatment | Duration of treatment | MTP 2017 (PKR) | NDWs 2017 | MTP 2019 (PKR) | NDWs 2019 |
|----------------------------------------------|-----------------------|-------------|-------------|-----------------------------------|-----------------------|----------------|-----------|----------------|-----------|
| ASTHMA                                       | Salbutamol Inhaler    | 100mcg/dose | Inhaler     | 200                               | As needed             | 128            | 0.3       | 140            | 0.3       |
| Cardiovascular Diseases/ Anti Hypertensives  | Bisoprolol            | 5mg         | tab         | 60                                | 30                    | 393            | 0.8       | 406.8          | 0.8       |
|                                              | Atenolol              | 50mg        | tab         | 30                                | 30                    | 61.5           | 0.1       | 76.5           | 0.2       |
|                                              | Captopril             | 25mg        | tab         | 60                                | 30                    | 390            | 0.8       | 420            | 0.8       |
|                                              | Amlodipine            | 5mg         | tab         | 60                                | 30                    | 108            | 0.2       | 390            | 0.8       |
|                                              | Losartan              | 50mg        | tab         | 60                                | 30                    | 660            | 1.4       | 810            | 1.6       |
|                                              | Nifedipine retard     | 20mg        | tab         | 90                                | 30                    | 238.5          | 0.5       | 478.4          | 1         |
|                                              | Propranolol           | 40mg        | tab         | 90                                | 30                    | 59.4           | 0.1       | 189            | 0.4       |
|                                              | Acetylsalicylic acid  | 75mg        | tab         | 30                                | 30                    | 30.45          | 0.1       | 33             | 0.1       |
| Anti hyperlipidemics                         | Simvastatin           | 20mg        | Cap/tablet  | 30                                | 30                    | 255            | 0.5       | 513.8          | 1         |
|                                              | Atorvastatin          | 20mg        | Cap/tablet  | 30                                | 30                    | 1125           | 2.4       | 1110           | 2.2       |
| Infections-Adult respiratory tract infection | Ceftriaxone Injection | 1g/vial     | Inj.        | 1                                 | 1                     | 280            | 0.6       | 300            | 0.6       |
|                                              | Ciprofloxacin         | 500mg       | tab         | 14                                | 7                     | 154            | 0.3       | 350            | 0.7       |
|                                              | Azithromycin          | 500mg       | tab         | 3                                 | 3                     | 120            | 0.3       | 60             | 0.1       |
|                                              | clarithromycin        | 500mg       | tab         | 28                                | 14                    | 1008           | 2.2       | 1238           | 2.5       |
|                                              | Amoxicillin           | 500mg       | cap         | 42                                | 14                    | 243.6          | 0.5       | 361.2          | 0.7       |
|                                              | Amoxicillin           | 250mg       | cap         | 84                                | 14                    | 252            | 0.5       | 302.4          | 0.6       |
| Fungal Infection                             | Fluconazole           | 200mg       | cap         | 1                                 | 1                     | 145.5          | 0.3       | 150            | 0.3       |
| Viral Infection                              | aciclovir             | 200mg       | tab         | 25                                | 5                     | 310            | 0.7       | 350            | 0.7       |
| Amoebiasis                                   | metronidazole         | 400mg       | tab         | 21                                | 7                     | 31.5           | 0.1       | 42             | 0.1       |
| CNS Drugs-Anti epileptics                    | Carbamezipine         | 200mg       | tab         | 60                                | 30                    | 198            | 0.4       | 270            | 0.5       |
| Depression                                   | Amitriptyline         | 25mg        | tab         | 60                                | 30                    | 71.4           | 0.2       | 76.8           | 0.2       |



|    |                 |             |          |      |     |    |       |     |       |     |
|----|-----------------|-------------|----------|------|-----|----|-------|-----|-------|-----|
| 1  | Anti Diabetics  | Metformin   | 500mg    | tab  | 90  | 30 | 135   | 0.3 | 180   | 0.4 |
| 2  |                 | Glibenclami | 5mg      | tab  | 90  | 30 | 141   | 0   | 132.3 | 0.3 |
| 3  |                 | de          |          |      |     |    |       |     |       |     |
| 4  |                 | Gliclazide  | 80mg     | tab  | 60  | 30 | 285   | 0.8 | 360   | 0.7 |
| 5  |                 | Insulin     | 100IU/ml | vial | 10  | 30 | 480   | 1   | 644   | 1.3 |
| 6  |                 | Isophane    |          |      |     |    |       |     |       |     |
| 7  |                 | (NPH)       |          |      |     |    |       |     |       |     |
| 8  |                 | Insulin     | 100IU/ml | vial | 10  | 30 | 480   | 1   | 644   | 1.3 |
| 9  |                 | Neutral     |          |      |     |    |       |     |       |     |
| 10 |                 | Soluble     |          |      |     |    |       |     |       |     |
| 11 |                 | (Regular)   |          |      |     |    |       |     |       |     |
| 12 | Ulcer Treatment | Omeprazole  | 20mg     | cap  | 30  | 30 | 460.5 | 1   | 353.7 | 0.7 |
| 13 |                 | ranitidine  | 150mg    | tab  | 120 | 30 | 831.6 | 1.8 | 966   | 1.9 |
| 14 | Pain/Inflammati | Paracetamol | 24mg/ml  | susp | 45  | 3  | 21.15 | 0   | 47.25 | 0.1 |
| 15 | on              |             |          |      |     |    |       |     |       |     |
| 16 | Arthritis       | Diclofenac  | 50mg     | tab  | 90  | 30 | 315   | 0.7 | 445.5 | 0.9 |

peer review only

## Research Checklist

Dear editor,

We submit the manuscript entitled “**Impact of National Drug Pricing Policy 2018 on Access to Medicines in Lahore Division, Pakistan: A Pre-Post Survey Study Using WHO/HAI Methodology**”, for your consideration to be published in *BMJ Open*. And we confirm that we have prepared submission materials according to the guideline.

And our main document has covered everything required, which including the following:

| Page no. | Line number | Item                       |
|----------|-------------|----------------------------|
| 1        |             | Title page                 |
| 2        | 1           | Abstract                   |
| 4        | 64          | Introduction               |
| 5        | 119         | Methods                    |
| 7        | 208         | Results                    |
| 11       | 301         | Discussion                 |
| 14       | 419         | Limitations                |
| 15       | 430         | Conclusion                 |
|          |             | <b>Other information</b>   |
| 15       | 449         | Funding                    |
| 15       | 438         | Acknowledgment             |
| 15       | 443         | Contributor ship Statement |
| 16       | 463         | References                 |

1  
2  
3  
4  
5  
6  
7  
8  
9  
10  
11  
12  
13  
14  
15  
16  
17  
18  
19  
20  
21  
22  
23  
24  
25  
26  
27  
28  
29  
30  
31  
32  
33  
34  
35  
36  
37  
38  
39  
40  
41  
42  
43  
44  
45  
46  
47  
48  
49  
50  
51  
52  
53  
54  
55  
56  
57  
58  
59  
60

|  |  |                        |
|--|--|------------------------|
|  |  | Supplementary material |
|--|--|------------------------|

For peer review only

# BMJ Open

## Impact of National Drug Pricing Policy 2018 on Access to Medicines in Lahore Division, Pakistan: A Pre-Post Survey Study Using WHO/HAI Methodology

|                               |                                                                                                                                                                                                                                                                                                                                                                                                                                                                                                                                                                                                                                                                                                                                                                                                                                                                                                                                                                                                                                                                                                                                                                                                                                                                                                                                                                                                                                                                                                                                                                                                                                                                                                                                                                                                                                                                                                                                                                                                                                                                                                                                                                                                                                                                                                                                                                                                                                                                                                                                                                                                                                                                                                                                                         |
|-------------------------------|---------------------------------------------------------------------------------------------------------------------------------------------------------------------------------------------------------------------------------------------------------------------------------------------------------------------------------------------------------------------------------------------------------------------------------------------------------------------------------------------------------------------------------------------------------------------------------------------------------------------------------------------------------------------------------------------------------------------------------------------------------------------------------------------------------------------------------------------------------------------------------------------------------------------------------------------------------------------------------------------------------------------------------------------------------------------------------------------------------------------------------------------------------------------------------------------------------------------------------------------------------------------------------------------------------------------------------------------------------------------------------------------------------------------------------------------------------------------------------------------------------------------------------------------------------------------------------------------------------------------------------------------------------------------------------------------------------------------------------------------------------------------------------------------------------------------------------------------------------------------------------------------------------------------------------------------------------------------------------------------------------------------------------------------------------------------------------------------------------------------------------------------------------------------------------------------------------------------------------------------------------------------------------------------------------------------------------------------------------------------------------------------------------------------------------------------------------------------------------------------------------------------------------------------------------------------------------------------------------------------------------------------------------------------------------------------------------------------------------------------------------|
| Journal:                      | <i>BMJ Open</i>                                                                                                                                                                                                                                                                                                                                                                                                                                                                                                                                                                                                                                                                                                                                                                                                                                                                                                                                                                                                                                                                                                                                                                                                                                                                                                                                                                                                                                                                                                                                                                                                                                                                                                                                                                                                                                                                                                                                                                                                                                                                                                                                                                                                                                                                                                                                                                                                                                                                                                                                                                                                                                                                                                                                         |
| Manuscript ID                 | bmjopen-2019-034720.R2                                                                                                                                                                                                                                                                                                                                                                                                                                                                                                                                                                                                                                                                                                                                                                                                                                                                                                                                                                                                                                                                                                                                                                                                                                                                                                                                                                                                                                                                                                                                                                                                                                                                                                                                                                                                                                                                                                                                                                                                                                                                                                                                                                                                                                                                                                                                                                                                                                                                                                                                                                                                                                                                                                                                  |
| Article Type:                 | Original research                                                                                                                                                                                                                                                                                                                                                                                                                                                                                                                                                                                                                                                                                                                                                                                                                                                                                                                                                                                                                                                                                                                                                                                                                                                                                                                                                                                                                                                                                                                                                                                                                                                                                                                                                                                                                                                                                                                                                                                                                                                                                                                                                                                                                                                                                                                                                                                                                                                                                                                                                                                                                                                                                                                                       |
| Date Submitted by the Author: | 21-Jul-2020                                                                                                                                                                                                                                                                                                                                                                                                                                                                                                                                                                                                                                                                                                                                                                                                                                                                                                                                                                                                                                                                                                                                                                                                                                                                                                                                                                                                                                                                                                                                                                                                                                                                                                                                                                                                                                                                                                                                                                                                                                                                                                                                                                                                                                                                                                                                                                                                                                                                                                                                                                                                                                                                                                                                             |
| Complete List of Authors:     | <p>Saeed, Amna; Xi'an Jiaotong University, 1 Department of Pharmacy Administration and Clinical Pharmacy, School of Pharmacy, Xi'an Jiaotong University, Shaanxi, China, 2 Center for Drug Safety and Policy Research, Xian Jiaotong University, Xi'an, Shaanxi, China, 3 Shaanxi Centre for Health Reform and Development Research, Shaanxi, China</p> <p>Saeed, Hamid; University of the Punjab, Department of Pharmaceutics</p> <p>Saleem, Zikria; The University of Lahore, Faculty of Pharmacy</p> <p>Yang, Caijun; Xi'an Jiaotong University, 1 Department of Pharmacy Administration and Clinical Pharmacy, School of Pharmacy, Xi'an Jiaotong University, Shaanxi, China, 2 Center for Drug Safety and Policy Research, Xian Jiaotong University, Xi'an, Shaanxi, China, 3 Shaanxi Centre for Health Reform and Development Research, Shaanxi, China</p> <p>Jiang, Minghuan; Xi'an Jiaotong University, 1 Department of Pharmacy Administration and Clinical Pharmacy, School of Pharmacy, Xi'an Jiaotong University, Shaanxi, China, 2 Center for Drug Safety and Policy Research, Xian Jiaotong University, Xi'an, Shaanxi, China, 3 Shaanxi Centre for Health Reform and Development Research, Shaanxi, China</p> <p>Zhao, Mingyue; Xi'an Jiaotong University, 1 Department of Pharmacy Administration and Clinical Pharmacy, School of Pharmacy, Xi'an Jiaotong University, Shaanxi, China, 2 Center for Drug Safety and Policy Research, Xian Jiaotong University, Xi'an, Shaanxi, China, 3 Shaanxi Centre for Health Reform and Development Research, Shaanxi, China</p> <p>Ji, Wenjing ; Xi'an Jiaotong University, 1 Department of Pharmacy Administration and Clinical Pharmacy, School of Pharmacy, Xi'an Jiaotong University, Shaanxi, China, 2 Center for Drug Safety and Policy Research, Xian Jiaotong University, Xi'an, Shaanxi, China, 3 Shaanxi Centre for Health Reform and Development Research, Shaanxi, China</p> <p>Aziz, Muhammad Majid; Xi'an Jiaotong University, 1 Department of Pharmacy Administration and Clinical Pharmacy, School of Pharmacy, Xi'an Jiaotong University, Shaanxi, China, 2 Center for Drug Safety and Policy Research, Xian Jiaotong University, Xi'an, Shaanxi, China, 3 Shaanxi Centre for Health Reform and Development Research, Shaanxi, China</p> <p>Khan, Faiz; Xi'an Jiaotong University, 1 Department of Pharmacy Administration and Clinical Pharmacy, School of Pharmacy, Xi'an Jiaotong University, Shaanxi, China, 2 Center for Drug Safety and Policy Research, Xian Jiaotong University, Xi'an, Shaanxi, China, 3 Shaanxi Centre for Health Reform and Development Research, Shaanxi, China</p> <p>Gillani, Ali Hassan; Xi'an Jiaotong University, 1 Department of Pharmacy</p> |

|                                 |                                                                                                                                                                                                                                                                                                                                                                                                                                                                                                                                                                                                                                                                                                                                                                                                                                                                                                                                                                                                                                   |
|---------------------------------|-----------------------------------------------------------------------------------------------------------------------------------------------------------------------------------------------------------------------------------------------------------------------------------------------------------------------------------------------------------------------------------------------------------------------------------------------------------------------------------------------------------------------------------------------------------------------------------------------------------------------------------------------------------------------------------------------------------------------------------------------------------------------------------------------------------------------------------------------------------------------------------------------------------------------------------------------------------------------------------------------------------------------------------|
|                                 | Administration and Clinical Pharmacy, School of Pharmacy, Xi'an Jiaotong University, Shaanxi, China, 2 Center for Drug Safety and Policy Research, Xian Jiaotong University, Xi'an, Shaanxi, China, 3 Shaanxi Centre for Health Reform and Development Research, Shaanxi, China Atif, Naveel; Xi'an Jiaotong University, 1 Department of Pharmacy Administration and Clinical Pharmacy, School of Pharmacy, Xi'an Jiaotong University, Shaanxi, China, 2 Center for Drug Safety and Policy Research, Xian Jiaotong University, Xi'an, Shaanxi, China, 3 Shaanxi Centre for Health Reform and Development Research, Shaanxi, China Fang, Yu; Xi'an Jiaotong University, 1 Department of Pharmacy Administration and Clinical Pharmacy, School of Pharmacy, Xi'an Jiaotong University, Shaanxi, China, 2 Center for Drug Safety and Policy Research, Xian Jiaotong University, Xi'an, Shaanxi, China, 3 Shaanxi Centre for Health Reform and Development Research, Shaanxi, China Babar, Zaheer Ud Din; University of Huddersfield, |
| <b>Primary Subject Heading</b>: | Pharmacology and therapeutics                                                                                                                                                                                                                                                                                                                                                                                                                                                                                                                                                                                                                                                                                                                                                                                                                                                                                                                                                                                                     |
| Secondary Subject Heading:      | Health policy, Health economics, Health services research, Pharmacology and therapeutics                                                                                                                                                                                                                                                                                                                                                                                                                                                                                                                                                                                                                                                                                                                                                                                                                                                                                                                                          |
| Keywords:                       | HEALTH ECONOMICS, Health policy < HEALTH SERVICES ADMINISTRATION & MANAGEMENT, Pharmacology < TROPICAL MEDICINE, HEALTH SERVICES ADMINISTRATION & MANAGEMENT                                                                                                                                                                                                                                                                                                                                                                                                                                                                                                                                                                                                                                                                                                                                                                                                                                                                      |
|                                 |                                                                                                                                                                                                                                                                                                                                                                                                                                                                                                                                                                                                                                                                                                                                                                                                                                                                                                                                                                                                                                   |

SCHOLARONE™  
Manuscripts



I, the Submitting Author has the right to grant and does grant on behalf of all authors of the Work (as defined in the below author licence), an exclusive licence and/or a non-exclusive licence for contributions from authors who are: i) UK Crown employees; ii) where BMJ has agreed a CC-BY licence shall apply, and/or iii) in accordance with the terms applicable for US Federal Government officers or employees acting as part of their official duties; on a worldwide, perpetual, irrevocable, royalty-free basis to BMJ Publishing Group Ltd ("BMJ") its licensees and where the relevant Journal is co-owned by BMJ to the co-owners of the Journal, to publish the Work in this journal and any other BMJ products and to exploit all rights, as set out in our [licence](#).

The Submitting Author accepts and understands that any supply made under these terms is made by BMJ to the Submitting Author unless you are acting as an employee on behalf of your employer or a postgraduate student of an affiliated institution which is paying any applicable article publishing charge ("APC") for Open Access articles. Where the Submitting Author wishes to make the Work available on an Open Access basis (and intends to pay the relevant APC), the terms of reuse of such Open Access shall be governed by a Creative Commons licence – details of these licences and which [Creative Commons](#) licence will apply to this Work are set out in our licence referred to above.

Other than as permitted in any relevant BMJ Author's Self Archiving Policies, I confirm this Work has not been accepted for publication elsewhere, is not being considered for publication elsewhere and does not duplicate material already published. I confirm all authors consent to publication of this Work and authorise the granting of this licence.

# Impact of National Drug Pricing Policy 2018 on Access to Medicines in Lahore Division, Pakistan: A Pre-Post Survey Study Using WHO/HAI Methodology

Amna Saeed<sup>1,2,3</sup>, Hamid Saeed<sup>4</sup>, Zikria Saleem<sup>5</sup>, Caijun Yang<sup>1,2,3</sup>, Minghuan Jiang<sup>1,2,3</sup>, Mingyue Zhao<sup>1,2,3</sup>, Wenjing Ji<sup>1,2,3</sup>, Muhammad Majid Aziz<sup>1,2,3</sup>, Faiz Ullah Khan<sup>1,2,3</sup>, Ali Hassan Gillani<sup>1,2,3</sup>, Naveel Atif<sup>1,2,3</sup>, Yu Fang<sup>1,2,3</sup>, and Zaheer-Ud-Din Babar<sup>6</sup>

1 Department of Pharmacy Administration and Clinical Pharmacy, School of Pharmacy, Xi'an Jiaotong University, Shaanxi, China,

2 Center for Drug Safety and Policy Research, Xian Jiaotong University, Xi'an, Shaanxi, China,

3 Shaanxi Centre for Health Reform and Development Research, Shaanxi, China,

4 Department of Pharmaceutics, University College of Pharmacy, University of the Punjab, Lahore, Pakistan,

5 Faculty of Pharmacy, The University of Lahore, Lahore, Pakistan,

6 Department of Pharmacy, School of Applied Sciences, University of Huddersfield, Huddersfield, West Yorkshire, United Kingdom.

**Correspondence:** Yu Fang, PhD, Professor Department of Pharmacy Administration and Clinical Pharmacy, School of Pharmacy, Xi'an Jiaotong University, Center for Drug Safety and Policy Research, Xi'an Jiaotong University 76 Yanta West Road Xi'an 710061 People, s Republic of China

Tell: +86-29-82655132

Mobile: 18591970591

Fax: +86-29-82655424

Email: yufang@mail.xjtu.edu.cn

**Word Count:** 5088

## 1 Abstract

2 **Objective:** To evaluate the impact of new national drug pricing policy (NDPP) 2018 on the access  
3 to medicines in terms of prices, availability and affordability.

4 **Design:** Two cross-sectional surveys were undertaken before and after the launch of NDPP 2018,  
5 using a modified WHO/HAI methodology.

6 **Setting:** Four districts of Lahore division, Pakistan.

7 **Participants:** 16 public sector hospitals and 16 private sector retail pharmacies.

8 **Measures:** The pre and post survey data on prices and availability of Lowest Price Generics  
9 (LPGs) and Originator Brands (OBs) of 50 medicines were obtained by visiting the same public  
10 and private sector health facilities (n=32). Out of 50, 46 surveyed medicines were from National  
11 Essential Medicines List (NEML). Inflation-adjusted median unit prices (MUPs) and median price  
12 ratios (MPRs) from 2019 were used for price comparison. Affordability was calculated in terms  
13 of number of days' wages required to get a standard treatment by the lowest paid unskilled  
14 government worker.

15 **Results:** The overall mean percent availabilities remained poor in both years i.e. far less than 80%.  
16 In public sector, the mean percent availability of OBs improved from 6.8% to 33.1% whereas, in  
17 case of LPGs it was reduced from 35.1% to 9%. In private sector, the mean percent availability of  
18 both OBs and LPGs demonstrated slight improvements in 2019 i.e. 55.0% to 58.3% and 20.3% to  
19 32.3%. The adjusted MUPs and MPRs of OBs significantly increased by a median of 4.29%  
20 (Wilcoxon test  $p=0.001$ ,  $p=0.0001$ ). Whereas, the adjusted MUPs and MPRs of LPGs were  
21 increased by a median of 15.7% ( $p=0.002$ ,  $p=0.0002$ ). Overall the affordability of many medicines  
22 for common ailments reduced significantly in 2019.

23 **Conclusions:** The availability of medicines slightly improved, except in the case of LPGs which  
24 was reduced at public sector. The implementation of NDPP 2018 led to increase in drug prices,  
25 making the standard treatment for some of the most prevalent ailments unaffordable. So verily, the  
26 drug pricing policy must be reviewed to ensure the access to essential medicines.



### 35 **Strengths and limitations of this study**

- 36 • This study is the first attempt to estimate the impact of a drug pricing policy, on the prices  
37 of essential medicines in four districts of Lahore division, Pakistan using validated  
38 WHO/HAI methodology.
- 39 • The data were collected from the same health facilities in both years to make the  
40 comparison of results reliable.
- 41 • This study provides an objective evidence to the policy makers, in terms of impact of NDPP  
42 2018 on access to medicines, for improving the current pricing policies.
- 43 • The study is limited to only one division of Pakistan, although the medicine prices are fixed  
44 centrally and are supposed to be the same across the country – affecting generalizability of  
45 the findings.
- 46 • The cross-sectional design of the study might not reflect the long term impact of NDPP  
47 2018 - the average monthly, quarterly or yearly availability of medicines at individual  
48 outlets.

## 64 Introduction

65 Access to affordable and quality assured essential medicines is considered as a key component of  
66 an effective healthcare system. It has also been pledged under Sustainable Development Goal  
67 (SDG) 3 by United Nations (UN) that the equitable access to affordable essential medicines will  
68 be ensured as a basic human right [1, 2]. Pakistani government, like many other Low and Middle  
69 Income Countries (LMICs), has been grappling with the issue of high medicine prices and poor  
70 availability of medicines that compromises the accessibility of medicines [1, 3-6]. In Pakistan, the  
71 medicines are provided free of cost at public sector health facilities, while patient pays out of  
72 pocket to get medicines from private sector [5]. In fact, the poor availability of medicines at public  
73 sector compels the patients to buy medicines from the private sector that escalates the burden on  
74 patient's pocket, as 24.3% (in 2015) of the population is living below the national poverty line [3,  
75 4, 7, 8]. Besides, medicine prices have increased up to 100%, both legally or illegally, in the past  
76 few years [3]. The drug prices are fixed by the federal government and the National Health Services  
77 Regulation and Coordination (NHSRC). The regional drug inspectors (DIs) are responsible for  
78 monitoring of drug prices in the pharmacies of their area. The NHSRC has been taking different  
79 policy measures to curb these issues through Drug Regulatory Authority of Pakistan (DRAP). The  
80 first ever National Drug Pricing Policy (NDPP) was launched in 2015 for making the pricing  
81 mechanism transparent but it had minimal impact on medicine prices, suitable for both patients  
82 and manufacturers as per media reports and available literature evidences [3, 9]. So, a new drug  
83 pricing policy was launched in 2018[10]. The objectives of this policy were to improve the access  
84 to essential medicines, devise rational prices, ensure a transparent mechanism for medicine pricing  
85 and to discourage illegal increase in drug prices.

86 Many modifications have been made to the pricing strategies in the NDPP 2018 compared to  
87 NDPP 2015, importantly the inclusion of all drugs (n=414) from National Essential Medicines List  
88 (NEML) under scheduled drugs category where the drugs are kept under strict price control as  
89 compared to other drugs. Whereas in NDPP 2015, only 160 drugs from NEML were enlisted in  
90 this category [9, 10]. In NDPP 2018, the annual adjustment in prices has been linked with the  
91 Consumer Price Index (CPI), the Maximum Retail Prices (MRPs) of scheduled drugs (all drugs  
92 from NEML) could be increased up to 70% of the CPI, whereas the MRPs of all other drugs could  
93 be increased equivalent to CPI of the immediate preceding year. This step seems to improve the  
94 affordability of essential medicines (EMs) for patients in Pakistan. If several generics are already  
95 available in the market then in NDPP 2015, the MRP of new entrant was fixed by taking the  
96 average of other generics, while in NDPP 2018, MRP will be fixed equivalent to the highest MRP  
97 of the available generics [9, 10]. However, this would lead to even higher priced generics in the  
98 market that could compromise patient's affordability. Some media reports are claiming that the  
99 current increase (up to 200%) in medicines prices is the highest in the last 40 years, while others  
100 are claiming that government is taking action against this illegal rise in medicine prices [11, 12].  
101 But there is no objective evidence to prove or disapprove these claims. The NDPP 2018, allows  
102 the MRPs of the New Chemical Entities (NCEs) to be fixed by using the External Reference  
103 Pricing (ERP) mechanism by considering India, Bangladesh, Indonesia, Sri Lanka, Philippines,  
104 Lebanon and Malaysia as reference countries. However, the reason behind using the MRPs of  
105 these countries as reference is not clear, though some of them practice free market economy model

1  
2  
3 106 and don't impose any price control measures over the MRPs in community pharmacies that may  
4 107 lead to high prices. The NDPP 2018 also takes into account the wholesale or procurement prices  
5 108 from British National Formulary, Australian Pharmaceutical Benefit Scheme and New Zealand  
6 109 Pharmaceutical Management Agency while fixing the MRPs of NCEs, however these may not be  
7 110 the true prices because discounts and rebates are given as a common practice, while making the  
8 111 payments. So, these ambiguities in the policy necessitate the evaluation of actual impact of these  
9 112 policies on the access to medicines in Pakistan.

12 113 In this context, we designed a study to measure the impact of new NDPP 2018 on access to  
13 114 essential medicines in terms of their prices, availability and affordability in Lahore division  
14 115 Punjab. We undertook a survey after the implementation of NDPP 2018 and compared it with a  
15 116 similar survey performed before the launch of this policy in 2017. Considering the objectives of  
16 117 the NDPP 2018, we hypothesized that it will improve the availability and affordability, meanwhile  
17 118 decrease the prices of EMs.

## 20 21 119 **Methodology**

### 22 23 120 **Study Design**

24 121 Two cross-sectional studies were conducted in 2016-17 and 2019 using a variant of World Health  
25 122 Organization/Health Action International (WHO/HAI) methodology in four districts of Lahore  
26 123 division, Pakistan [13]. Since, the focus of this study was to measure the impact of NDPP 2018 in  
27 124 terms of changes in medicines prices, availability and affordability after its implementation,  
28 125 therefore, the data on these parameters was collected to evaluate the accessibility of medicines in  
29 126 both years [10]. The first survey was conducted from November 2016 to March 2017, while the  
30 127 second survey was from March-May 2019, representing two fiscal years of Pakistan. For optimal  
31 128 and reliable comparison, the list of medicines, survey region and survey outlets selected for the  
32 129 survey 2019 were similar to those selected for 2017. The details of survey region, medicine  
33 130 selection, sampling of medicine outlets and data collection are given elsewhere and are briefly  
34 131 described in this paper [7].

### 35 36 132 **Survey Areas**

37 133 Pakistan consists of four provinces which are sub-divided into several administrative units called  
38 134 "divisions", each division is further sub-divided into districts, and districts into tehsils. Lahore is  
39 135 the largest division of Pakistan in terms of population i.e. 16.28 Million (2017) and estimated to  
40 136 be 19.4 Million as of 2018 [14]. It consists of four districts named as Lahore, Kasur, Sheikhpura  
41 137 and Nankana Sahib and 17 Tehsils. All the four districts were selected for the surveys.

### 42 43 138 **Sampling of Medicine Outlets**

44 139 Medicine outlets or health facilities from both public and private sectors were sampled  
45 140 systematically using WHO/HAI manual as a guiding principle in both the surveys [13]. Total 32  
46 141 medicine outlets were surveyed (16 from public sector and 16 from private sector). From public  
47 142 sector, hospitals from all three tiers of healthcare system i.e. primary, secondary and tertiary were  
48 143 selected. One main hospital in each district was selected as a survey anchor along with additional

1  
2  
3 144 three more hospitals selected randomly and situated within three hours' drive from the main  
4 145 hospital. In this way, 4 hospitals were selected in each district making up a total of 16 hospitals  
5 146 from Lahore division. From private sector, one registered pharmacy was selected situated within  
6 147 10 kilometers range of each public sector hospital. So, a total of 16 pharmacies were selected from  
7 148 Lahore division, i-e. 4 retail pharmacies from each district. It is important to note that each survey  
8 149 unit, one hospital and one nearby pharmacy, was located in different Tehsils, so out of 17 Tehsils  
9 150 of Lahore division, 16 were surveyed in both years.

### 151 **Selection of Medicines**

152 50 medicines were selected for survey as per WHO/HAI methodology, which included all 14  
153 medicines from WHO core global list of medicines and 36 supplementary medicines. The criterion  
154 of selecting medicines for supplementary list was local disease burden and inclusion of medicines  
155 in NEML [15].

### 156 **Data Collection**

157 The data were collected using a data collection form by the trained data collectors. The data  
158 collectors visited the health facilities and physically checked the medicines prices and availability  
159 for both OBs and LPGs of each medicine and entered it into data collection forms. The data for  
160 each year were entered separately in to the WHO/HAI workbook by using double data entry  
161 process, to avoid any mistake [13]. The patient prices or the prices charged to patients were entered  
162 into the forms for private sector only, since the medicines are provided free of charge in public  
163 sector, in Pakistan. Thus, the availability of medicines was documented only for public sector  
164 facility.

### 165 **Data Analysis**

166 Data were analyzed by using WHO/HAI preprogrammed Excel workbook [13], IBM Statistical  
167 Package for the Social Sciences (SPSS) version 22.0 and R version 3.5.1 (codenamed "Feather  
168 Spray").

169 *The availability* was calculated as percentage of particular medicine available at each facility  
170 on the day of data collection. The mean percentage availabilities were also calculated and  
171 compared between different sectors (public and private), product types (OBs and LPGs) and  
172 among different groups (global medicines, supplementary medicines, medicines from NEML,  
173 medicines used to treat NCDs and IDs). Availability was documented as follows; absent: 0% of  
174 facilities had surveyed enlisted medicines at the time of survey; Low: < 50% of facilities had the  
175 surveyed enlisted medicines; fairly high: 50 -80% of facilities had the surveyed enlisted medicines;  
176 High: > 80% of facilities, survey enlisted medicines were found in most of the facilities [16, 17].

177 *Medicine prices* were calculated as Median Unit Prices (MUPs) in Pakistani Rupees (PKR)  
178 and were also compared with International Reference Prices (IRPs) to calculate the Median Price  
179 Ratios (MPRs). The IRPs were obtained from Management Sciences for Health (MSH) drug price  
180 indicator guide 2015[18]. An MPR of greater than 1 for public sector and greater than 2 for private  
181 sector would lodge any medicine into high priced medicines category [7]. For comparing the prices  
182 between two years, the MUPs from 2019 were deflated by 3.33%, taking 2017 as base year. 70%

183 of the CPI was used for calculating this deflation factor, because the medicine prices can be  
184 increased annually by 70% of the CPI as per NDPP 2018 [19]. Whereas MPR was calculated as  
185 follows:

186  $Median\ Price\ Ratio(MPR) = Median\ local\ unit\ price/International\ reference\ unit\ price$

187 *Affordability* for treatment of different common diseases with selected medicines was  
188 calculated and compared in terms of Number of Days Wages (NDWs) required for a lowest paid  
189 government employee to get the standard treatment courses. Whereas, if a patient had to spend  
190 more than one day of his wage for treatment with a specific medicine in a month, that medicine  
191 was considered unaffordable [13]. For affordability comparison, NDWs in two years, the prices in  
192 2019 were not deflated because the salary has also been increased in 2019. So, the salary of the  
193 lowest paid unskilled government worker was taken as 14000PKR per month (2016-17) and  
194 15000PKR per month (2018-19) [20].

195 *Comparative analysis:* Two patient prices were required to be included in the comparative  
196 analysis, one from 2017 and other from 2019. The difference in prices, availability and  
197 affordability were computed as percentage changes for each product. The mean availability and  
198 MUPs were also compared between different categories of medicines (NEML and non-NEML  
199 medicines; global and supplementary medicines; medicines for IDs and NCDs) across the years.  
200 We compared affordability in terms NDWs to get the standard treatment from the surveyed  
201 medicines. These were also compared among medicines for different disease groups (asthma,  
202 cardiovascular diseases, infectious diseases, brain disorders, diabetes, ulcer and arthritis; IDs and  
203 NCDs). To identify whether the difference between MUPs, MPRs and NDWs was significant  
204 across two years, we used Wilcoxon signed rank test. We took  $p < 0.01$  as an indicator of significant  
205 difference in all the statistical testing.

## 206 **Patient and Public Involvement**

207 Patients or the public were not involved in the design, or conduct, or reporting, or  
208 dissemination of this study.

## 209 **Results**

### 210 **Availability of medicines**

211 The overall availability of surveyed medicines was improved in 2019 when compared with 2017,  
212 except for LPGs in public sector, where it demonstrated reduction.

213 *Availability in Public Sector:* In public sector, the availability of both OBs and LPGs was  
214 poor in both years. None of the mean availabilities touched the benchmark of 80%. The mean  
215 percent availability of OBs improved from 6.8% to 33.1%, whereas, in case of LPGs it reduced  
216 from 35.1% to 9%. The individual percent availabilities of each medicine (OB and LPG) are given  
217 in table S1. For better understanding of the data, we have used the data visualization tool in R and  
218 plotted a box plot of the data as shown in figure 1. The box plot showed distributional  
219 characteristics of the percent availability of medicines in two groups (OB and LPG) for the years  
220 2017 and 2019. The mean percent availability is represented by the dot inside the box. In 2017,

221 availabilities of 75% of the OBs in public sector were less than 11.2% as shown by the 3<sup>rd</sup> quartile  
 222 or the upper bar of the 1<sup>st</sup> box plot. Whereas, in 2019, 75% of the OBs had availabilities higher  
 223 than 6.3% which is almost equivalent to the mean percent availability (6.8%) in 2017. This  
 224 indicates a substantial increase in the availability of OBs in public sector. In 2019, 75% of the  
 225 LPGs had the availability of less than 12.5% (3<sup>rd</sup> quartile) whereas before the implementation of  
 226 the NDPP 2018, 75% of the LPGs had availabilities of more than 14.3% (1<sup>st</sup> quartile). This showed  
 227 a remarkable decrease in the availability of LPGs in public sector in 2019.

228 *Availability in private sector:* In both years, the overall availability was better in private sector  
 229 than the public sector. Mean percent availability of both OBs and LPGs were improved in 2019  
 230 i.e. 55.0% to 58.3% and 20.3% to 32.3%, respectively. Availability of LPGs was less than OBs in  
 231 both years. For OBs, the mean percent availability improved slightly by 3.3% while data  
 232 distribution remained almost the same across the years, as shown in the box plot (figure 1). For  
 233 LPGs, a substantial increase in the availability was observed in terms of mean percent availability,  
 234 maximum value and change in data distribution (figure 1). In 2017, the IQR (range between upper  
 235 and lower bar of the box) for percentage availability of LPGs ranged from 6% to 31% whereas it  
 236 got improved in 2019 and ranged from 6% to 50%.

237 *Availability in different subgroups of medicines:* When we compared availability of LPGs  
 238 and OBs in different subgroups of medicines as shown in table 1, we found that mean percent  
 239 availabilities of all global list medicines were higher than supplementary medicines in both years.  
 240 Similarly, the availability of NEML medicines were higher than non-NEML medicines except for  
 241 the non-NEML LPGs in public sector, which were higher than NEML LPGs (19.2% vs 8.1%). In  
 242 2017, in public sector, the availability of OBs for NCD medicines (6.7%) were lower than OBs for  
 243 ID medicines (7.7%), whereas the availability of LPGs (35.9%) were better than LPGs of ID  
 244 medicines (33%). Surprisingly, in 2019, the situation inversed completely for NCD medicines,  
 245 increased and decreased availability of OBs (33.2%) and LPGs (33.1%), respectively, whereas,  
 246 the availability decreased for LPGs (8.8%) and increased for OBs (9.5%) for ID medicines.

247 **Table 1.** Mean Percent Availabilities of Originator Brands (OBs) and Lowest Price Generics  
 248 (LPGs) at both public and private sectors.

|                                                | Availability in 2017<br>(Mean, SD) ,% |                |                |                | Availability in 2019<br>(Mean, SD) ,% |                |                |                | Change in mean percent<br>availability (%) |       |                |      |
|------------------------------------------------|---------------------------------------|----------------|----------------|----------------|---------------------------------------|----------------|----------------|----------------|--------------------------------------------|-------|----------------|------|
|                                                | Public Sector                         |                | Private Sector |                | Public Sector                         |                | Private Sector |                | Public Sector                              |       | Private Sector |      |
|                                                | OBs                                   | LPGs           | OBs            | LPGs           | OBs                                   | LPGs           | OBs            | LPGs           | OBs                                        | LPGs  | OBs            | LPGs |
| <b>All medicines<br/>(n=50)</b>                | 6.8<br>(10.4)                         | 35.1<br>(23.6) | 55<br>(31.1)   | 20.3<br>(14.4) | 33.1<br>(27.8)                        | 9<br>(14.9)    | 58.3<br>(32.3) | 32.3<br>(26)   | 26.3                                       | -26.1 | 3.3            | 12   |
| <b>Global<br/>Medicines<br/>(n=14)</b>         | 11.2<br>(15.2)                        | 50.1<br>(32.1) | 64.3<br>(22.5) | 25.9<br>(14.5) | 48.4<br>(31.5)                        | 14.3<br>(19.9) | 66.5<br>(31.2) | 43.8<br>(27.8) | 37.2                                       | -35.8 | 2.2            | 17.9 |
| <b>Supplementar<br/>y medicines<br/>(n=36)</b> | 5<br>(7.0)                            | 29.2<br>(21.4) | 51.4<br>(33)   | 18.1<br>(14)   | 27.2<br>(24.1)                        | 7<br>(12.1)    | 55<br>(32.6)   | 27.8<br>(24.1) | 22.2                                       | -22.3 | 3.6            | 9.7  |

|                                 |               |                |                |                |                |               |                |                |      |       |      |      |
|---------------------------------|---------------|----------------|----------------|----------------|----------------|---------------|----------------|----------------|------|-------|------|------|
| <b>NEML medicines (n=46)</b>    | 7.2<br>(10.7) | 35.5<br>(26)   | 55.3<br>(31)   | 20.7<br>(14.6) | 33.9<br>(28.1) | 8.1<br>(15.1) | 58.4<br>(32.9) | 33.3<br>(26.3) | 26.7 | -27   | 3.1  | 12.6 |
| <b>Non-NEML medicines (n=4)</b> | 1.8<br>(3.0)  | 35.5<br>(34)   | 51.6<br>(36)   | 15.6<br>(11)   | 24.8<br>(25)   | 19.2<br>(7)   | 56.3<br>(28)   | 20.3<br>(21)   | 23   | -16   | 4.7  | 4.7  |
| <b>NCD medicines (n=36)</b>     | 6.4<br>(9.2)  | 35.9<br>(25.5) | 55.7<br>(28.8) | 20<br>(14.3)   | 33.2<br>(27)   | 8.8<br>(14)   | 62.3<br>(29.3) | 31.3<br>(25)   | 26.8 | -27.1 | 6.6  | 11.1 |
| <b>ID medicines (n=14)</b>      | 7.7<br>(13.3) | 33<br>(29)     | 53.1<br>(37.3) | 21<br>(15)     | 33.1<br>(30.5) | 9.5<br>(17.4) | 47.8<br>(38.1) | 34.8<br>(29.2) | 25.4 | -23.5 | -5.3 | 13.8 |

249 Where, SD refers to Standard deviation, NEML refers to National Essential Medicine List, NCD  
250 refers to Non Communicable Diseases and ID refers to Infectious Diseases.

251 *Availability at different levels of healthcare:* When we compared the availability at different  
252 levels of public healthcare sectors i.e. primary, secondary and tertiary, the availability of OBs  
253 improved in 2019, while it was decreased for LPGs. The pattern of overall medicines availability  
254 remained almost the same as of 2017 i.e. tertiary care>secondary care>primary care as shown in  
255 table S2.

## 256 Medicine Prices

257 An overall increase was noted in all adjusted MUPs and adjusted MPRs between 2017 and  
258 2019 for both OBs and LPGs as shown in Table 2. In 2019, for all 42 available OBs, the adjusted  
259 MUPs and MPRs significantly increased by a median of 4.3% (Wilcoxon test p=0.001, p=0.0001).  
260 Whereas in case of all 37 available LPGs, the adjusted MUPs and MPRs were increased by a  
261 median of 15.7% (p=0.002, p=0.0002). In 2017, the MPRs of OBs ranged from 0.58 to 60.62 in  
262 2017 and 0.73 to 77.59 in 2019. 63% of the OBs had MPR of more than 2. Whereas, in 2019  
263 almost 75% of the OBs had MPR greater than 2. The MPRs of LPGs ranged from 0.42 to 19.95 in  
264 2017 and 0.39 to 19.89 in 2019. In 2017, for LPGs, the median value of MPR was less than 2 (i.e.  
265 1.36) while in 2019 this median value became greater than 2 (i.e. 2.26). This means that many  
266 LPGs which were previously affordable got shifted to the high priced medicines category in 2019.  
267 The MUPs and MPRs for all OBs is given in table S3 and for all LPGs is given in table S4.

268 **Table 2.** Median price ratios (MPRs) and median unit prices (MUPs) of originator brands (OBs) and  
269 lowest price generics (LPGs) in private sector among different subgroups across the years 2017 and 2019.

| Originator Brands (OBs)           |              |              |                      |                               |                                         |
|-----------------------------------|--------------|--------------|----------------------|-------------------------------|-----------------------------------------|
|                                   | MPR-<br>2017 | MPR-<br>2019 | MUP<br>2017<br>(PKR) | Adjusted<br>MUP 2019<br>(PKR) | Median<br>percent change<br>in MUPs/MPR |
| All medicines<br>(n=42)           | 2.5          | 3.2          | 6.99                 | 8.49                          | 4.29%                                   |
| Global<br>Medicines<br>(n=13)     | 2.8          | 3.2          | 7.66                 | 8.22                          | 3.35%                                   |
| Supplementary medicines<br>(n=29) | 2.5          | 3.3          | 6.38                 | 10.1                          | 5.1%                                    |
| NEML medicines                    | 2.4          | 3.3          | 6.38                 | 8.51                          | 5.1%                                    |

|                                     |                      |                      |                               |                                        |                                                 |
|-------------------------------------|----------------------|----------------------|-------------------------------|----------------------------------------|-------------------------------------------------|
| (n=39)<br>Non-NEML medicines        | 3                    | 3.2                  | 7.66                          | 8.22                                   | 1.93%                                           |
| (n=3)<br>NCD medicines              | 2.6                  | 3.3                  | 6.19                          | 7.83                                   | 3.35%                                           |
| (n=36)<br>CD medicines              | 2.3                  | 2.9                  | 24.3                          | 31.2                                   | 7.36%                                           |
| (n=10)                              |                      |                      |                               |                                        |                                                 |
| <b>Lowest Price Generics (LPGs)</b> |                      |                      |                               |                                        |                                                 |
|                                     | <b>MPR-<br/>2017</b> | <b>MPR-<br/>2019</b> | <b>MUP<br/>2017<br/>(PKR)</b> | <b>Adjusted<br/>MUP<br/>2019 (PKR)</b> | <b>Median<br/>percent change<br/>in MPR/MUP</b> |
| All medicines<br>(n=37)             | 1.4                  | 2.3                  | 5.8                           | 6.29                                   | 15.7%                                           |
| Global<br>Medicines<br>(n=13)       | 1.6                  | 2.7                  | 5.8                           | 6.56                                   | 19.2%                                           |
| Supplementary medicines<br>(n=24)   | 1.3                  | 2.2                  | 5.9                           | 6.04                                   | 14.8%                                           |
| NEML medicines<br>(n=34)            | 1.4                  | 2.2                  | 5.4                           | 6                                      | 15.8%                                           |
| Non-NEML medicines<br>(n=3)         | 2.5                  | 2.7                  | 6.5                           | 6.7                                    | 3.97%                                           |
| NCD medicines<br>(n=26)             | 1.2                  | 2.2                  | 4.1                           | 5.4                                    | 16.3%                                           |
| CD medicines<br>(n=11)              | 1.8                  | 2.4                  | 8.4                           | 10.9                                   | 14.8%                                           |

270 Where PKR is Pakistani Rupee.

271 The price data was also analyzed in different subgroups as shown in table 2. There was an  
 272 increase in MUPs and MPRs for OBs of supplementary list of medicines compared to medicines  
 273 from global list (5.5% vs 3.35%). However, it was inverse in case of LPGs, i.e. the prices of global  
 274 medicines increased compared to supplementary medicines (19.2% vs 14.8%). Increment in the  
 275 prices of NEML medicines was more as compared to non-NEML medicines. Next, we compared  
 276 the medicines used for NCDs and IDs. Data suggested that the increase in the MUPs and MPRs of  
 277 OBs for IDs was significant in comparison to NCDs (11.2% vs 7.36%). Whereas it was completely  
 278 opposite in the case of LPGs, where the increase was greater for NCD than ID medicines (16.3%  
 279 vs 14.8%). It is also noteworthy that increase in prices for LPGs is more significant than OBs for  
 280 all subgroups of medicines.

### 281 **Affordability**

282 Between 2017 and 2019, the median NDWs required for treatment with all OBs (n=36)  
 283 increased from 1.05 to 2 and 0.5 to 0.7 for all LPGs (n=31), respectively. In 2019, the median  
 284 percent increase in NDWs for LPGs (n=31) was much higher as compared to OBs (n=36) i.e.  
 285 12.5% (p=0.008) and 3% (p=0.081) respectively. So, an overall increase in NDWs for both OBs  
 286 and LPGs was observed between 2017 and 2019. Similarly the Median Treatment Prices (MTPs)  
 287 for OB and LPGs also increased significantly i.e. 464 PKR to 563 PKR (p<0.001) and 244 PKR  
 288 to 350 PKR (p<0.001), respectively. The MTPs and NDWs for each medicine are given in

10



289 supplementary tables S5 and S6. The medicines were categorized into seven disease groups to  
290 further analyze changes in the affordability between 2017 and 2019. In figure 2, a bar graph shows  
291 Median NDWs required for both OBs and LPGs in each disease group, where the values above 1  
292 were considered unaffordable. In 2017, the median NDWs of OBs to treat three types of diseases  
293 i.e. CVDs (1.2), diabetes (1.4) and ulcers (2.75) were more than 1. Whereas in 2019, medicines  
294 for another disease category made its place into this list i.e. the medicines for IDs (1.18). Compared  
295 to 2017, the median NDWs for all OBs increased in 2019 except for OBs acting on Central Nervous  
296 System (CNS) and OBs to treat ulcers. The treatment for ulcer remained highly unaffordable in  
297 both years. The median NDWs for LPGs increased in 2019 for the treatment of Arthritis, CNS  
298 disorders, CVDs and IDs, while the modest decrease in median NDWs for LPGs was observed for  
299 some diseases i.e. asthma, diabetes and ulcers as shown in figure 2.

## 300 Discussion

301 This study provides a valuable insight in to the effects of NDPP 2018 associated changes on  
302 medicine prices, availability and affordability in both public and private healthcare sectors of  
303 Lahore division, Pakistan. The main objective of this updated policy was to improve the access to  
304 essential medicines (EMs) and improve rational drug pricing. Our study has shown that the  
305 overall availability of medicines improved in 2019 in comparison to 2017 i.e. before the  
306 implementation of this policy, except for the LPGs in public sector, demonstrating reduction.  
307 Overall the medicine prices were increased significantly, making majority of the EMs used for the  
308 common ailments unaffordable, with a much higher price increases for LPGs in comparison to  
309 OBs. The medicines used to treat ulcers, diabetes and CVDs remained most unaffordable in both  
310 years. Despite the modest improvements in the availability of surveyed medicines after NDPP  
311 2018, the increased unaffordability of the surveyed medicines earnestly require significant  
312 revisions and improvements in the current pricing policy to ensure the affordability of surveyed  
313 medicines to the patients.

314 Despite improvements in the availability of medicines between 2017 and 2019, the  
315 availability of medicine remained below the optimal benchmark of 80% [13]. In public sector the  
316 availability of OBs improved remarkably probably be due to decentralization procurement of  
317 medicines in public sector. Before 2018, the medicines were procured centrally for all the public  
318 sector hospitals except for teaching hospitals, within a province. But after 2018, the medicines  
319 procurement was decentralized for public sector hospital to allow hospitals in each district a free  
320 choice to select desired manufactures, thus, ending up in the selection of more OBs than LPGs,  
321 possibly due to quality concerns about medicines. Another factor that improved medicines  
322 availability after 2018 was authorization of hospitals to acquire medicines directly without any  
323 delays. However, as practiced in the previous central supply system, the medicines were received  
324 centrally from the manufacturers before reaching the concerned hospital with considerable effect  
325 on timely availability of medicines. In both years, the mean percentage availabilities for all  
326 medicines were found higher in the private sector compared to the public sector, corroborating  
327 similar previous studies conducted in Bangladesh and Malawi in 2019 [21, 22]. The overall  
328 availability of medicines from NEML was slightly better than non-NEML medicines in both public  
329 and private sectors. This might be attributed to the active role of DRAP in the revision and

1  
2  
3 330 subsequent dissemination of the revised NEML i.e. NEML 2018 [15]. Furthermore, the public  
4 331 hospitals are encouraged to procure drugs from the latest NEML 2018 that has been standardized  
5 332 in line with WHO essential medicines model list 2017 [23]. Besides, a mobile application was  
6 333 launched in 2018 with user friendly interface to better disseminate the information on enlisted  
7 334 medicines [24]. So, the NDPP 2018, doesn't seem to be solely responsible for the availability of  
8 335 medicines.

11 336 Although we found some improvements in the availability of medicines, there was a  
12 337 substantial increase in medicine prices, making them inaccessible for most of the population.  
13 338 According to one estimate approximately 46 million people are living below the national poverty  
14 339 line in Pakistan (as per 2015) [8]. The increases in prices of both OBs and LPGs may fairly be  
15 340 attributable to the NDPP 2018, that allows an annual increase in the prices of scheduled drugs up  
16 341 to 70% of CPI compared to 50% of CPI as per NDPP 2015 [9, 10]. These changes in price  
17 342 calculations seems to accentuate the substantial impact on overall prices of medicines, thus,  
18 343 making them more expensive. The increase in LPGs prices were more significant as compared to  
19 344 OBs suggesting that with already expensive OBs, the price increase in LPGs would impoverish  
20 345 the overall access to medicines, imputable to the changes in formula for LPGs (new entrants) price  
21 346 calculation. According to NDPP 2018, the MRP of new entrant first generic should be fixed at  
22 347 20% less than that of OB compared to NDPP2015, where it was 30% less than MRP of OB.  
23 348 Another possible variable is the prior availability of generics in the market for price calculation,  
24 349 where, according to NDPP2018, the MRP of a new entrant (LPGs) was fixed equal to the highest  
25 350 MRP of the available generics in the market, while as per NDPP2015 practice, MRP was fixed by  
26 351 taking the average of other generics in the market. Therefore, these changes in price calculating  
27 352 mechanisms might have led to higher prices of many new LPGs in the market. Hence, contrary to  
28 353 NDPP 2018's price steerage objectives, the increase in medicine prices was more distinct for  
29 354 NEML medicines as compared to non-NEML medicines.

35 355 Data from further analysis on affordability of standard treatment by selected OBs and LPGs  
36 356 suggested that majority of the medicines have become more unaffordable in 2019. When the  
37 357 affordability was compared for medicines of different disease groups, the three foremost  
38 358 unaffordable OBs were ones for treatment of ulcers, diabetes and CVDs. Additionally, the  
39 359 treatment for ulcers remained exceptionally unaffordable with OBs and LPGs in both years.  
40 360 Nevertheless, the treatment of CVDs and diabetes with LPGs remained affordable in 2017 but the  
41 361 NDWs for CVDs surpassed affordability threshold in 2019. Among the disease categories, NCDs  
42 362 harbor the top three unaffordable slots. It is noteworthy, that the burden of NCDs is increasing  
43 363 worldwide and is responsible for higher mortality rates than all other diseases combined [25-27].  
44 364 The CVDs, diabetes, cancer and chronic respiratory diseases are responsible for about 80% of  
45 365 these deaths [28]. Pakistan is among top 10 countries where prevalence of diabetes is very high.  
46 366 Besides, one third of Pakistanis, above 45 years of age have hypertension [29-31]. Thus, the  
47 367 unaffordability of the essential medicines for NCDs, such as CVDs and diabetes, has worse bearing  
48 368 on affordability associated therapeutic outcomes that ultimately leads to increased morbidity and  
49 369 mortality due to un-controlled disease.

370 Additionally, we also compared the median drug prices in 2019 with the prices  
 371 published/allowed by DRAP in its latest Statutory Regulatory Orders (SROs). On December 31,  
 372 2018, the DRAP revised and published the maximum retail prices (MRPs) of about 1084 drugs  
 373 through SRO-1608, SRO-1609 and SRO-1610 [32]. Eighteen OBs from our study sample were  
 374 part of these price revisions (table 3). Surprisingly, after comparing the MUPs of 18 selected OBs  
 375 with prices allowed by the government, we found that most of the OBs, 14 out of 18, were sold at  
 376 higher prices than the allowable prices – with median percent increase of 29.37%. These data  
 377 suggested that these intentional malpractices by the drug sellers might be driven by poor price  
 378 control regulation by price enforcement authorities. Therefore, the current drug pricing policy  
 379 NDPP 2018, is not the sole reason for the price hike. Most probably main stakeholders in the drug  
 380 supply chain are also contributing towards medicine inflated prices. Thus, it's reasonable to deduce  
 381 that these factors may interfere with measuring the direct impact of current pricing policy.

382 **Table 3.** Maximum retail unit prices (MRPs) of Originator Brands (OBs) allowed by the  
 383 government versus median unit prices (MUPs) found in private sector pharmacies.

| Medicine Name            | Strength (Dosage form) | Allowed Unit Price (PKR) | MUP 2019 (PKR) | Percentage difference |
|--------------------------|------------------------|--------------------------|----------------|-----------------------|
| Aciclovir                | 200mg (tab)            | 52.6                     | 75             | 42.5%                 |
| Amlodipine               | 5mg (tab)              | 8.5                      | 13             | 52.9%                 |
| Amoxicillin              | 250mg (cap)            | 3.75                     | 3.75           | 0%                    |
| Amoxicillin              | 500mg (cap)            | 5.58                     | 8.75           | 56.8%                 |
| Atorvastatin             | 20mg (cap)             | 141.37                   | 203.5          | 43.9%                 |
| Bisoprolol               | 5mg (tab)              | 15.35                    | 16.72          | 8.9%                  |
| Carbamezipine            | 200mg (tab)            | 4                        | 5              | 25%                   |
| Ceftriaxone              | 1g (inj)               | 783                      | 783            | 0%                    |
| Ciprofloxacin            | 500mg (tab)            | 39.25                    | 52.5           | 33.7%                 |
| Digoxin                  | 0.25mg (tab)           | 1.75                     | 2.68           | 53.1%                 |
| Fluconazole              | 200mg (cap)            | 425                      | 585            | 37.6%                 |
| Insulin N                | 100IU (vial)           | 88.47                    | 75.88          | -14.2%                |
| Insulin R                | 100IU (vial)           | 93.88                    | 75.88          | -19.1%                |
| Methyldopa               | 250mg (tab)            | 7.71                     | 8.1            | 5.05%                 |
| Omeprazole               | 20mg (cap)             | 42.9                     | 52.29          | 21.8%                 |
| Propranolol              | 40mg (tab)             | 1.1                      | 3.16           | 187.2%                |
| Pyremethamine+Sulfadoxim | (25+500)mg (tab)       | 12.01                    | 12.02          | 0.08%                 |
| Simvastatin              | 20mg (cap)             | 47.01                    | 68             | 44.6%                 |
| Medians                  |                        | 27.3                     | 34.505         | 29.3%                 |

384 Although the formation of a national scale pricing policy is laudable but it seems to be a  
 385 collection of drug price calculation formulas only. It should also include the mechanism for price  
 386 monitoring, an aspect which seems to be one of the major reasons behind failure to achieve the  
 387 goals of NDPP 2018. Inclusion of WHO/HAI based surveys on regular basis could also be an  
 388 option, in this case. The WHO has developed a mobile application named “WHO Essential

13

1  
2  
3 389 Medicines and Health Products Price and Availability Monitoring (WHO EMP MedMon)", which  
4 390 can be used to collect and analyze price and availability data from health care outlets. This  
5 391 application is based on standard WHO/HAI methodology and it can be used both online and  
6 392 offline, making it both time saving and cost effective [33]. The drug inspectors or a third party can  
7 393 be given this responsibility to monitor and report the prices using WHO EMP MedMon on a  
8 394 regular basis, ensuring the compliance by drug manufacturers and sellers to NDPP. There could  
9 395 be many other policy implications having an impact on drug pricing, availability and affordability.  
10 396 The procurement of medicines should be strictly based on the NEML. Clear cut mechanism for  
11 397 NEML based procurement should be devised and implemented specially in the public sector  
12 398 hospitals. Besides, the hospital pharmacy and therapeutics committees must actively evaluate the  
13 399 safety, efficacy and cost-effectiveness of drugs before purchasing. Pharmaco-economic  
14 400 evaluations of drugs must be promoted by allocating research funds to experts. Not all drugs should  
15 401 be fully reimbursed in the hospitals, only essential medicines must be included in this list. Hence,  
16 402 the profits from other drugs can be used to purchase essential drugs when needed. Smooth  
17 403 functioning of the drug supply chain with proper quality control must be ensured. The current  
18 404 inflated prices would have a grave impact on the access to essential medicines, especially for the  
19 405 low and middle income population of Pakistan. Thus, there is dire need to develop clearer evidence  
20 406 based and stringent price control policy, especially for essential medicines. Exempting or reducing  
21 407 taxes and tariffs on EMs and promotion of local generic manufacture by providing subsidies on  
22 408 raw materials may improve both the availability and affordability of these medicines. While using  
23 409 the External Reference Pricing (ERP) mechanism, the reference countries should be chosen  
24 410 critically e.g. countries with similar pharmaceutical market and economic status. For costly  
25 411 medicines, regressive markups must be encouraged over progressive markups. The drug prices  
26 412 must be monitored on regular basis using a validated and well-designed scientific methodology  
27 413 and pricing policy must be revised based on such evidences. The essential medicines for most  
28 414 prevalent diseases such as diabetes and CVDs must be preferentially made affordable by devising  
29 415 some specific pricing strategies for these medicines. Besides, efforts must be made to enforce the  
30 416 pricing policy effectively by introducing reward and punishment system to induce a healthy  
31 417 competition among the drug manufacturers and sellers.

32  
33  
34  
35  
36  
37  
38  
39  
40 418 Although, this study provides an objective evidence to the policy makers for improving the current  
41 419 pricing policies. It has some limitations as well. The study includes medicines with specific  
42 420 strengths and dosage forms to compare with IRPs. There might be other strengths/dosage forms of  
43 421 the surveyed medicines, available in the health facilities, so the availability of the medicines may  
44 422 be underestimated. The affordability was calculated for single medicine for each disease, whereas  
45 423 patients are usually taking more than one drug at a time – under-estimating the extent of  
46 424 affordability of a specific treatment for a specific disease. Moreover, the post survey was  
47 425 conducted after about a year from the launch of new drug pricing policy 2018, so the results do  
48 426 not reflect the long term impact of the policy. Further surveys could be conducted in future to  
49 427 gauge the long term effects of the policy as it was done by Fang et al in two such surveys conducted  
50 428 after the health reform in China [17].

51  
52  
53  
54 429 In Conclusion, the availability of medicines has been improved after the launch of a new drug  
55 430 pricing policy by Pakistani government but it still below the benchmark, thus, forcing the patients

431 to buy medicines from private sector at their own expense. The prices of both LPGs and OBs of  
432 EMs have increased remarkably in 2019, when compared with 2017. The medicines to treat most  
433 prevalent non-communicable diseases (diabetes and CVDs) have become more expensive and  
434 unaffordable. The maximum retail prices of several OBs have been illegally increased in the  
435 market, adding more burden on patients' pockets. Thus, the pricing policy should be improved  
436 with strict price control measures, especially for the EMs, such as ensuring transparency on the  
437 costs of drug development process and distribution, NEML based procurement, and reduction in  
438 the taxes and tariffs on local production of EMs.

### 439 **Acknowledgements**

440 We are thankful to Dr. Margaret Ewen, Senior projects manager, medicine prices at Health Action  
441 International (HAI), for helping us in designing the study. We are also grateful to Dr. Hira Azhar  
442 for editing this manuscript. We would like to acknowledge the pharmacists from surveyed  
443 institutions, data collectors and partners from research area who made this research possible.

### 444 **Contributions**

445 AS, ZB and YF conceptualize the study. ZS, HS, AS and ZB designed methodology. ZS, HS, AS  
446 trained the data collectors and obtained the data. YF provided resources and supervised the project.  
447 ZS worked as survey area manager. MA, AHG, NA, FK and MZ did data cleaning, validation and  
448 entry. AS, HS, CY, MJ analyzed the data. AS and HS wrote original draft. YF, ZB, ZS, CY and  
449 MJ, WJ reviewed and edited the manuscript.

450 **Funding** This work was funded by the "Young Talent Support Plan", "High Achiever Plan" of  
451 Health Science Center, Xi'an Jiaotong University, and the Central University Basic Research Fund  
452 (2015qngz05).

### 453 **Competing Interests**

454 None

### 455 **Patient Consent for Publication**

456 Not Required

### 457 **Ethics Approval**

458 Ethics approval was obtained from the Medical Ethics Committee of Xi'an Jiaotong University  
459 under study ID 2019-067.

### 460 **Data availability statement**

461 Extra data can be accessed via the Dryad data repository at <http://datadryad.org/> with the  
462 doi:10.5061/dryad.tjq2bvwq

463

## References

1. United Nations Development Group, United Nations. Statistical Division. Indicators for monitoring the millennium development goals: definitions, rationale, concepts and sources. United Nations Publications 2003:95.
2. World Health Organization. Medicine prices and access to medicines in the Eastern Mediterranean Region. 2007.
3. Lee KS, Shahidullah A, Zaidi ST, *et al*. The Crux of the Medicine Prices' Controversy in Pakistan. *Frontiers in pharmacology* 2017;8:504.
4. Kiani A, Qadeer A, Mirza Z, *et al*. Prices, availability and affordability of medicines in Pakistan. Geneva: Health Action International (HAI); 2006.
5. Zaidi S, Bigdeli M, Aleem N, *et al*. Access to essential medicines in Pakistan: policy and health systems research concerns. *PloS One* 2013;8:e63515.
6. Cameron A, Ewen M, Ross-Degnan D, *et al*. Medicine prices, availability, and affordability in 36 developing and middle-income countries: a secondary analysis. *The Lancet* 2009;373:240.
7. Saeed A, Saeed H, Saleem Z, *et al*. Evaluation of prices, availability and affordability of essential medicines in Lahore Division, Pakistan: A cross-sectional survey using WHO/HAI methodology. *PloS One* 2019;14:e0216122.
8. The World Bank. Poverty and Equity data portal. 2015. Available: <http://povertydata.worldbank.org/poverty/country/PAK>. [Accessed: 16 June 2019].
9. Costing and Pricing Division, Drug Regulatory Authority of Pakistan. Drug Pricing Policy 2015.
10. Costing and Pricing Division, Drug Regulatory Authority of Pakistan. Drug Pricing Policy 2018.
11. Durrani F. Increase in drug prices highest in last 40 years. The News 2019. Available: <https://www.thenews.com.pk/print/454864-increase-in-drug-prices-highest-in-last-40-years>. [Accessed: 3 September 2019].
12. Junaidi I. Minister orders crackdown on firms increasing medicine prices. DAWN News 2019. Available: <https://www.dawn.com/news/1473573>. [Accessed: 3 September 2019].

- 1  
2  
3 494 13. World Health Organization. Measuring medicine prices, availability, affordability and  
4 price components 2008.  
5 495  
6  
7 496 14. Pakistan Bureau of Statistics. Population Census. 2017. Available:  
8 <http://www.pbs.gov.pk/content/population-census>. [Accessed: 18 August 2019].  
9 497  
10 498 15. Drug Regulatory Authority of Pakistan. National Essential Medicines List. 2018.  
11  
12 499 16. Yang H, Dib HH, Zhu M, *et al*. Prices, availability and affordability of essential  
13 medicines in rural areas of Hubei Province, China. *Health policy and planning*  
14 500 2009;25:219.  
15 501  
16  
17 502 17. Fang Y, Wagner AK, Yang S, *et al*. Access to affordable medicines after health reform:  
18 evidence from two cross-sectional surveys in Shaanxi Province, western China. *The*  
19 503 *Lancet Global Health* 2013;1:e227.  
20 504  
21  
22 505 18. Management Sciences for Health. International Medical Products Price Guide 2015.  
23  
24 506 19. Pakistan Bureau of Statistics, Government of Pakistan. Price Statistics. Available:  
25 [http://www.pbs.gov.pk/content/officially-published-consumer-prices-data-imf-](http://www.pbs.gov.pk/content/officially-published-consumer-prices-data-imf-template)  
26 507 [template](http://www.pbs.gov.pk/content/officially-published-consumer-prices-data-imf-template). [Accessed 18 August 2019].  
27 508  
28  
29 509 20. Wage Indicator Foundation. Minimum wages in Pakistan 2018. Available:  
30 <https://wageindicator.org/Wageindicatorfoundation>. [Accessed 15 April 2019].  
31 510  
32  
33 511 21. Kasonde L, Tordrup D, Naheed A, *et al*. Evaluating medicine prices, availability and  
34 affordability in Bangladesh using World Health Organisation and Health Action  
35 International methodology. *BMC health services research* 2019;19:383.  
36 513  
37  
38 514 22. Khuluza F, Haefele-Abah C. The availability, prices and affordability of essential  
39 medicines in Malawi: A cross-sectional study. *PloS One* 2019;14:e0212125.  
40 515  
41  
42 516 23. Jabri P. National essential medicine list -2018 to be implemented in all provinces:  
43 Kiani. Business Recorder 2018. Available:  
44 [https://www.brecorder.com/2018/10/06/444080/national-essential-medicine-list-](https://www.brecorder.com/2018/10/06/444080/national-essential-medicine-list-2018-to-be-implemented-in-all-provinces-kiani/)  
45 518 [2018-to-be-implemented-in-all-provinces-kiani/](https://www.brecorder.com/2018/10/06/444080/national-essential-medicine-list-2018-to-be-implemented-in-all-provinces-kiani/) . [Accessed: 3 September 2019].  
46 519  
47  
48 520 24. Govt. launches WHO backed national essential medicine list. Pakistan Today 2018.  
49 Available: [https://www.pakistantoday.com.pk/2018/10/05/govt-launches-who-](https://www.pakistantoday.com.pk/2018/10/05/govt-launches-who-backed-national-essential-medicine-list/)  
50 521 [backed-national-essential-medicine-list/](https://www.pakistantoday.com.pk/2018/10/05/govt-launches-who-backed-national-essential-medicine-list/). [Accessed: 3 September 2019].  
51 522  
52  
53 523 25. Dans A, Ng N, Varghese C, *et al*. The rise of chronic non-communicable diseases in  
54 southeast Asia: time for action. *The Lancet* 2011;377:680.  
55 524  
56  
57  
58  
59  
60

- 1  
2  
3 525 26. Siegel KR, Patel SA, Ali MK. Non-communicable diseases in South Asia:  
4 526 contemporary perspectives. *British medical bulletin* 2014;111:31.  
5  
6 527 27. Habib SH, Saha S. Burden of non-communicable disease: global overview. *Diabetes*  
7 528 *& Metabolic Syndrome: Clinical Research & Reviews* 2010;4:41.  
8  
9 529 28. World Health Organization. Global action plan for the prevention and control of non-  
10 530 communicable diseases 2013-2020, 2013.  
11  
12 531 29. Ghaffar A, Reddy KS, Singhi M. Burden of non-communicable diseases in South Asia.  
13 532 *BMJ* 2004;328:807.  
14  
15 533 30. Jafar TH, Haaland BA, Rahman A, *et al*. Non-communicable diseases and injuries in  
16 534 Pakistan: strategic priorities. *The Lancet* 2013;381:2281.  
17  
18 535 31. Wasay M, Zaidi S, Jooma R. Non communicable diseases in Pakistan: burden,  
19 536 challenges and way forward for health care authorities. *Journal of Pakistan Medical*  
20 537 *Association* 2014; 64:1218.  
21  
22 538 32. Drug Regulatory Authority of Pakistan. SRO: Pricing division 2018. Available:  
23 539 <https://www.dra.gov.pk/Home/Pricing>. [Accessed: 17 July 2019].  
24  
25 540 33. World Health Organization. MedMon - WHO Essential Medicines and Health Products  
26 541 Price and Availability Monitoring Mobile Application. 2016. Available:  
27 542 <https://www.who.int/medicines/areas/policy/monitoring/empmedmon/en/>  
28  
29 543 [Accessed: 30 March 2020].  
30  
31 544  
32  
33 545  
34  
35  
36  
37  
38  
39

40 546 **Figure 1. Box plot of percent availability of lowest price generics (LPGs) and originator**  
41 547 **brands (OBs) in both public (pub) and private (pvt) sectors in 2017 and 2019.** This box plot  
42 548 shows the distributional characteristics of the percent availability of medicines in two groups (OB  
43 549 and LPG) for the years 2017 and 2019. The mean percent availability is represented by the dot  
44 550 inside the box.  
45

46  
47 551 **Figure 2. Bar graph of affordability of originator brands (OBs) and lowest price generics (LPGs)**  
48 552 **for different diseases in both years i.e. 2017 and 2019.**  
49

50 553

51 554  
52  
53  
54  
55  
56  
57  
58  
59  
60



1  
2  
3  
4  
5  
6  
7  
8  
9  
10  
11  
12  
13  
14  
15  
16  
17  
18  
19  
20  
21  
22  
23  
24  
25  
26  
27  
28  
29  
30  
31  
32  
33  
34  
35  
36  
37  
38  
39  
40  
41  
42  
43  
44  
45  
46  
47  
48  
49  
50  
51  
52  
53  
54  
55  
56  
57  
58  
59  
60

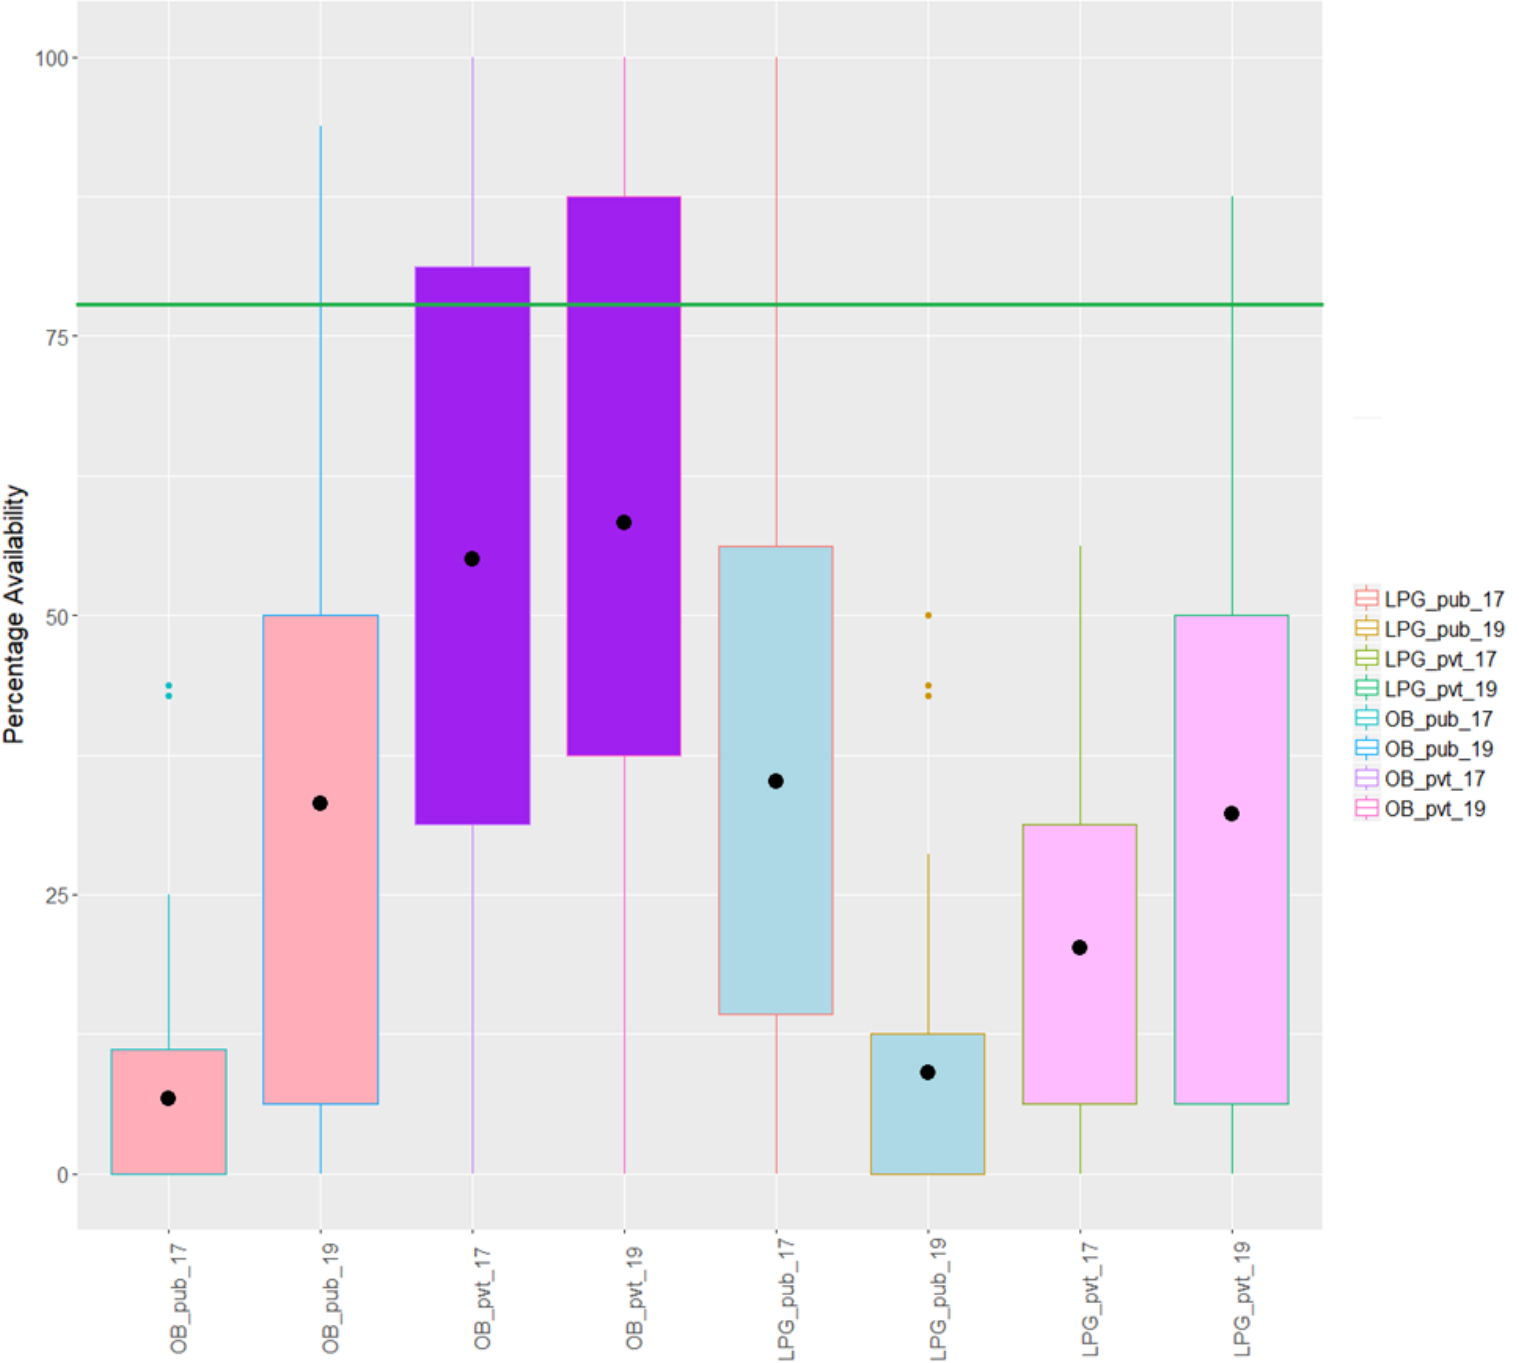

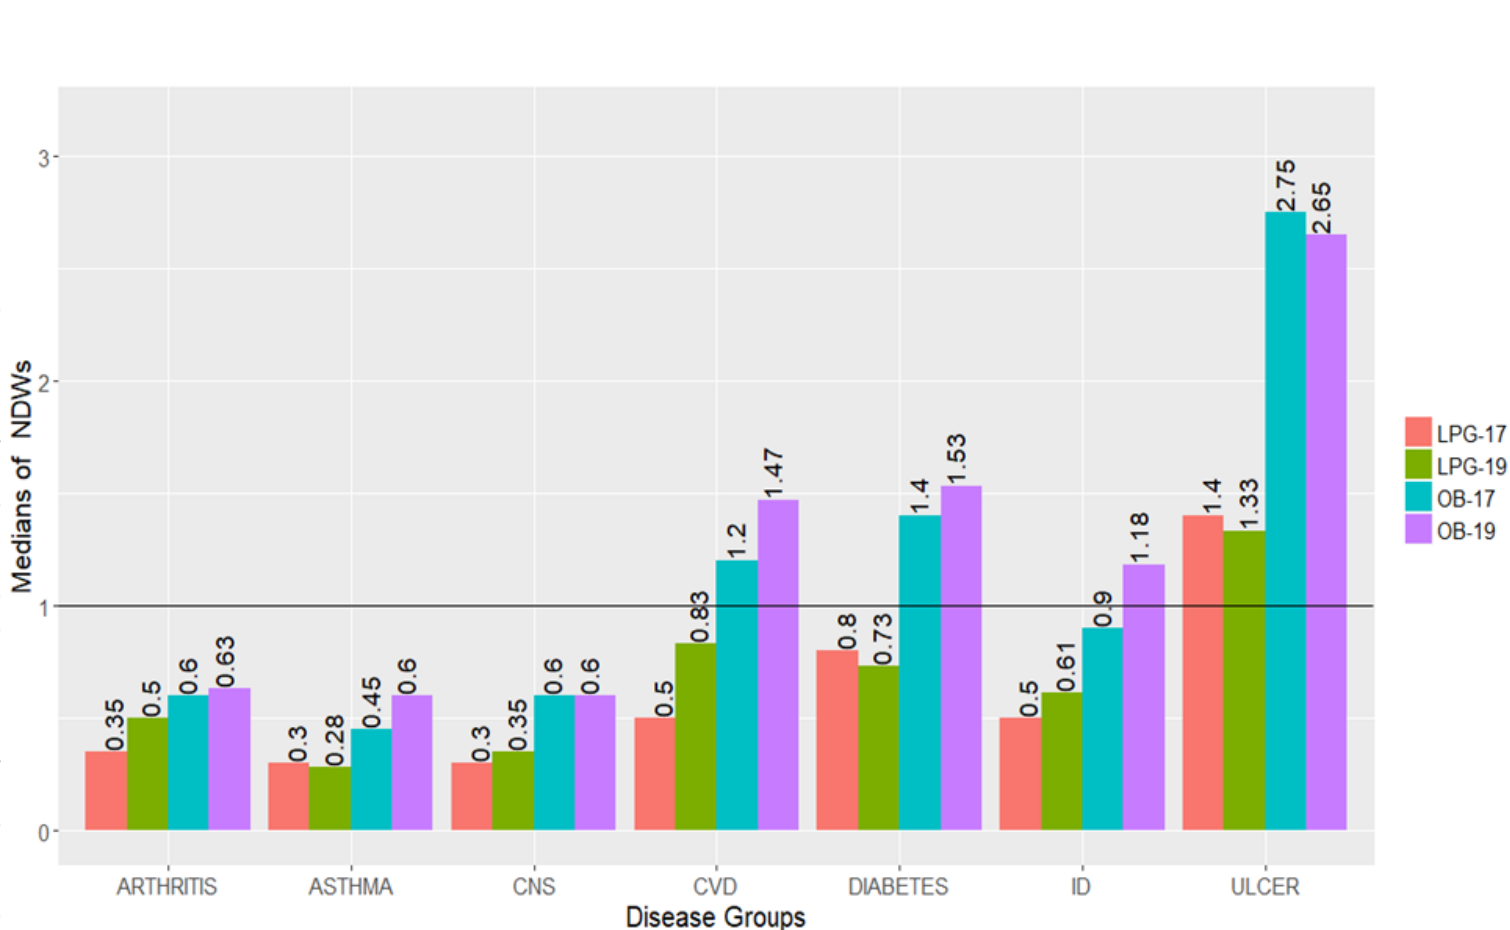

Review only

## Supplementary Tables

**Table S1.** Percent availabilities and of originator brands (OBs) and lowest price generics (LPGs) of all medicines in public and private sector in 2017 and 2019 (%)

| Names of meds                     | OB<br>(Public)<br>2017 | OB<br>(Pvt.)<br>2017 | LPG<br>(Public)<br>) 2017 | LPG<br>(Pvt.)<br>2017 | OB<br>(Public<br>) 2019 | OB<br>(Pvt)<br>2019 | LPG<br>(Public<br>) 2019 | LPG<br>(pvt.)<br>2019 |
|-----------------------------------|------------------------|----------------------|---------------------------|-----------------------|-------------------------|---------------------|--------------------------|-----------------------|
| Acetylsalicylic Acid              | 0.0                    | 25.0                 | 56.3                      | 25.0                  | 18.8                    | 75.0                | 50.0                     | 18.8                  |
| Aciclovir                         | 0.0                    | 50.0                 | 25.0                      | 37.5                  | 6.3                     | 18.8                | 0.0                      | 50.0                  |
| Amiodarone                        | 7.1                    | 62.5                 | 21.4                      | 6.3                   | 0.0                     | 62.5                | 21.4                     | 0.0                   |
| Amitriptyline                     | 0.0                    | 31.3                 | 0.0                       | 25.0                  | 0.0                     | 0.0                 | 50.0                     | 50.0                  |
| Amlodipine                        | 6.3                    | 75.0                 | 62.5                      | 31.3                  | 37.5                    | 93.8                | 12.5                     | 56.3                  |
| Amoxicillin                       | 43.8                   | 93.8                 | 18.8                      | 25.0                  | 93.8                    | 68.8                | 0.0                      | 37.5                  |
| Amoxicillin (250)                 | 18.8                   | 100.0                | 12.5                      | 31.3                  | 50.0                    | 87.5                | 0.0                      | 37.5                  |
| Atenolol                          | 12.5                   | 87.5                 | 81.3                      | 43.8                  | 43.8                    | 81.3                | 0.0                      | 56.3                  |
| Atorvastatin                      | 7.1                    | 50.0                 | 21.4                      | 25.0                  | 42.9                    | 62.5                | 21.4                     | 18.8                  |
| Azithromycin                      | 0.0                    | 25.0                 | 25.0                      | 31.3                  | 31.3                    | 25.0                | 25.0                     | 75.0                  |
| Beclometasone inhaler             | 0.0                    | 6.3                  | 35.7                      | 12.5                  | 35.7                    | 43.8                | 0.0                      | 0.0                   |
| Bisoprolol                        | 6.3                    | 87.5                 | 18.8                      | 25.0                  | 37.5                    | 81.3                | 0.0                      | 56.3                  |
| Captopril                         | 0.0                    | 81.3                 | 85.7                      | 25.0                  | 50.0                    | 93.8                | 28.6                     | 50.0                  |
| Carbamazepine                     | 12.5                   | 87.5                 | 56.3                      | 25.0                  | 25.0                    | 31.3                | 0.0                      | 56.3                  |
| Ceftriaxone injection             | 14.3                   | 68.8                 | 71.4                      | 31.3                  | 21.4                    | 75.0                | 50.0                     | 87.5                  |
| Ciprofloxacin                     | 0.0                    | 81.3                 | 100.0                     | 37.5                  | 64.3                    | 93.8                | 14.3                     | 25.0                  |
| Clarithromycin                    | 0.0                    | 87.5                 | 35.7                      | 25.0                  | 50.0                    | 93.8                | 0.0                      | 56.3                  |
| Co-trimoxazole suspension         | 6.3                    | 31.3                 | 62.5                      | 6.3                   | 6.3                     | 6.3                 | 43.8                     | 6.3                   |
| Diazepam                          | 6.3                    | 62.5                 | 12.5                      | 0.0                   | 43.8                    | 68.8                | 0.0                      | 0.0                   |
| Diclofenac                        | 42.9                   | 50.0                 | 35.7                      | 6.3                   | 85.7                    | 93.8                | 0.0                      | 81.3                  |
| Digoxin                           | 21.4                   | 62.5                 | 28.6                      | 0.0                   | 28.6                    | 68.8                | 0.0                      | 56.3                  |
| Enalapril                         | 0.0                    | 68.8                 | 62.5                      | 18.8                  | 12.5                    | 68.8                | 12.5                     | 50.0                  |
| Fluconazole                       | 0.0                    | 37.5                 | 18.8                      | 25.0                  | 43.8                    | 43.8                | 0.0                      | 50.0                  |
| Fluoxetine                        | 0.0                    | 43.8                 | 12.5                      | 43.8                  | 6.3                     | 62.5                | 6.3                      | 62.5                  |
| Fluphenazine Decanoate            | 0.0                    | 0.0                  | 0.0                       | 12.5                  | 0.0                     | 0.0                 | 7.1                      | 6.3                   |
| Furosemide                        | 12.5                   | 93.8                 | 50.0                      | 6.3                   | 50.0                    | 87.5                | 0.0                      | 0.0                   |
| Glibenclamide                     | 18.8                   | 68.8                 | 56.3                      | 12.5                  | 68.8                    | 93.8                | 0.0                      | 12.5                  |
| Gliclazide                        | 0.0                    | 75.0                 | 0.0                       | 18.8                  | 7.1                     | 75.0                | 0.0                      | 31.3                  |
| Hydrochlorothiazide               | 0.0                    | 0.0                  | 0.0                       | 12.5                  | 18.8                    | 0.0                 | 0.0                      | 0.0                   |
| Indinavir                         | 0.0                    | 0.0                  | 0.0                       | 0.0                   | 0.0                     | 0.0                 | 0.0                      | 0.0                   |
| Insulin Isophane (NPH)            | 0.0                    | 75.0                 | 50.0                      | 25.0                  | 56.3                    | 68.8                | 0.0                      | 18.8                  |
| Insulin Neutral Soluble (Regular) | 0.0                    | 68.8                 | 50.0                      | 25.0                  | 68.8                    | 68.8                | 0.0                      | 18.8                  |
| Losartan                          | 7.1                    | 43.8                 | 14.3                      | 43.8                  | 0.0                     | 43.8                | 42.9                     | 43.8                  |
| Lovastatin                        | 0.0                    | 0.0                  | 6.3                       | 0.0                   | 6.3                     | 37.5                | 12.5                     | 0.0                   |

|                                |      |      |      |      |      |       |      |      |
|--------------------------------|------|------|------|------|------|-------|------|------|
| Metformin                      | 25.0 | 81.3 | 56.3 | 31.3 | 68.8 | 93.8  | 0.0  | 50.0 |
| Methyldopa                     | 12.5 | 81.3 | 25.0 | 0.0  | 75.0 | 68.8  | 0.0  | 0.0  |
| Metronidazole                  | 25.0 | 93.8 | 56.3 | 37.5 | 75.0 | 87.5  | 0.0  | 56.3 |
| Nevirapine                     | 0.0  | 0.0  | 14.3 | 0.0  | 0.0  | 0.0   | 0.0  | 0.0  |
| Nifedipine Retard              | 0.0  | 75.0 | 28.6 | 12.5 | 0.0  | 31.3  | 14.3 | 12.5 |
| Omeprazole                     | 6.3  | 56.3 | 75.0 | 37.5 | 62.5 | 62.5  | 6.3  | 50.0 |
| Omeprazole (10)                | 0.0  | 12.5 | 43.8 | 18.8 | 18.8 | 0.0   | 12.5 | 31.3 |
| Paracetamol suspension         | 6.3  | 68.8 | 87.5 | 25.0 | 81.3 | 87.5  | 0.0  | 81.3 |
| Phenytoin                      | 0.0  | 6.3  | 12.5 | 6.3  | 0.0  | 50.0  | 6.3  | 0.0  |
| Propranolol                    | 12.5 | 68.8 | 12.5 | 6.3  | 18.8 | 87.5  | 0.0  | 25.0 |
| Pyrimethamine with sulfadoxine | 0.0  | 75.0 | 21.4 | 6.3  | 21.4 | 68.8  | 0.0  | 6.3  |
| Ranitidine                     | 0.0  | 81.3 | 31.3 | 25.0 | 50.0 | 100.0 | 0.0  | 50.0 |
| Salbutamol inhaler             | 0.0  | 81.3 | 56.3 | 31.3 | 62.5 | 68.8  | 0.0  | 12.5 |
| Simvastatin                    | 0.0  | 25.0 | 21.4 | 56.3 | 0.0  | 37.5  | 7.1  | 25.0 |
| Spirolactone                   | 6.3  | 62.5 | 25.0 | 0.0  | 12.5 | 93.8  | 6.3  | 43.8 |
| Zidovudine                     | 0.0  | 0.0  | 0.0  | 0.0  | 0.0  | 0.0   | 0.0  | 0.0  |
| Mean availabilities            | 6.8  | 55.0 | 35.1 | 20.3 | 33.1 | 58.3  | 9.0  | 32.3 |

Table (S2). Change in availability at different levels of healthcare (Public Sector).

|                                             | Primary level<br>(n=2 outlets) |                | Secondary level (n=13<br>outlets) |                | Tertiary level<br>(n=1 outlet) |                |
|---------------------------------------------|--------------------------------|----------------|-----------------------------------|----------------|--------------------------------|----------------|
|                                             | All medicines<br>(n=50)        |                | All medicines<br>(n=50)           |                | All medicines<br>(n=50)        |                |
|                                             | OB                             | LPG            | OB                                | LPG            | OB                             | LPG            |
| Mean<br>Availability<br>2017<br>(SD),%      | 0.0<br>(0.0)                   | 25.8<br>(44.5) | 7.1<br>(11.2)                     | 35.2<br>(27.5) | 12.0<br>(32.8)                 | 50.0<br>(50.5) |
| Mean<br>Availability<br>2019<br>(SD) ,%     | 21.0<br>(31.0)                 | 3.2<br>(18)    | 32.3<br>(29.1)                    | 7.4<br>(13.4)  | 68.0<br>(47.1)                 | 22.0<br>(41.8) |
| Change in mean<br>percent<br>availability,% | 21.0                           | -22.6          | 25.2                              | -27.8          | 56.0                           | -28.0          |

**Table S3.** Change in median unit prices (MUPs) and median price ratios (MPRs) of the Originator Brands (OBs) at private sector.

| Sr. no. | Medicines (OB)                    | MUPs 2017 (PKR) | MPR 2017 | Adjusted MUP in 2019 | MPR 2019 | Percentage change in MUPs/MPRs |
|---------|-----------------------------------|-----------------|----------|----------------------|----------|--------------------------------|
| 1       | Acetylsalicylic Acid              | 1.16            | 0.8      | 1.12                 | 0.7      | -3.41%                         |
| 2       | Aciclovir                         | 70              | 20       | 72.5                 | 21       | 3.48%                          |
| 3       | Amiodarone                        | 17.78           | 2.2      | 17.4                 | 2.2      | -2.15%                         |
| 4       | Amlodipine                        | 11.93           | 7.3      | 12.6                 | 7.7      | 5.1%                           |
| 5       | Amoxicillin                       | 8.616           | 2.8      | 8.46                 | 2.7      | -1.83%                         |
| 6       | Amoxicillin (250)                 | 3.56            | 2.1      | 3.63                 | 2.2      | 1.83%                          |
| 7       | Atenolol                          | 6.19            | 5.6      | 6.14                 | 5.5      | -0.81%                         |
| 8       | Atorvastatin                      | 201.9           | 18       | 197                  | 18       | -2.6%                          |
| 9       | Azithromycin                      | 40              | 1.7      | 118                  | 5        | 66.2%                          |
| 10      | Beclometasone inhaler             | 1.25            | 1.2      | 1.84                 | 1.8      | 32%                            |
| 11      | Bisoprolol                        | 11.28           | 1.2      | 16.2                 | 1.7      | 30.2%                          |
| 12      | Captopril                         | 7.66            | 3        | 8.22                 | 3.2      | 6.81%                          |
| 13      | Carbamazepine                     | 4.91            | 2.6      | 4.84                 | 2.5      | -1.55%                         |
| 14      | Ceftriaxone injection             | 672             | 16       | 757                  | 18       | 11.2%                          |
| 15      | Ciprofloxacin                     | 50.4            | 13       | 50.8                 | 13       | 0.72%                          |
| 16      | Clarithromycin                    | 65.7            | 2.5      | 76.4                 | 2.9      | 14%                            |
| 17      | Co-trimoxazole suspension         | 0.29            | 0.6      | 0.44                 | 0.9      | 33.4%                          |
| 18      | Diazepam                          | 2               | 2        | 1.93                 | 1.9      | -3.41%                         |
| 19      | Diclofenac                        | 5.625           | 12       | 5.61                 | 12       | -0.29%                         |
| 20      | Digoxin                           | 2.52            | 2.4      | 2.59                 | 2.5      | 2.76%                          |
| 21      | Enalapril                         | 5.85            | 5.4      | 6                    | 5.6      | 2.43%                          |
| 22      | Fluconazole                       | 442             | 61       | 566                  | 78       | 21.9%                          |
| 23      | Fluoxetine                        | 43.42           | 9.7      | 43                   | 9.6      | -0.9%                          |
| 24      | Furosemide                        | 1.89            | 3        | 2.34                 | 3.7      | 19.2%                          |
| 25      | Glibenclamide                     | 1.69            | 2.9      | 2.09                 | 3.5      | 19.1%                          |
| 26      | Gliclazide                        | 7.6             | 1.5      | 16.4                 | 3.3      | 53.8%                          |
| 27      | Insulin Isophane (NPH)            | 64.5            | 1.1      | 73.4                 | 1.3      | 12.1%                          |
| 28      | Insulin Neutral Soluble (Regular) | 64.5            | 1.1      | 73.4                 | 1.2      | 12.1%                          |
| 29      | Losartan                          | 51.67           | 4.3      | 50.3                 | 4.2      | -2.76%                         |
| 30      | Metformin                         | 1.54            | 1        | 1.62                 | 1        | 5.21%                          |
| 31      | Methyldopa                        | 6.38            | 1.9      | 7.83                 | 2.3      | 18.5%                          |
| 32      | Metronidazole                     | 1.57            | 1.3      | 1.52                 | 1.2      | -3.41%                         |
| 33      | Nifedipine Retard                 | 5.69            | 2.7      | 5.8                  | 2.8      | 1.93%                          |
| 34      | Omeprazole                        | 49.78           | 34       | 50.6                 | 35       | 1.55%                          |
| 35      | Paracetamol suspension            | 0.85            | 1.6      | 2.2                  | 4.1      | 61.4%                          |
| 36      | Phenytoin                         | 5.2             | 4.8      | 23.2                 | 22       | 77.6%                          |
| 37      | Propranolol                       | 1.55            | 2.2      | 3.06                 | 4.3      | 49.3%                          |

|    |                                |       |     |      |     |        |
|----|--------------------------------|-------|-----|------|-----|--------|
| 38 | Pyrimethamine with sulfadoxine | 5.83  | 1.4 | 11.6 | 2.8 | 49.8%  |
| 39 | Ranitidine                     | 8.8   | 3.7 | 8.51 | 3.6 | -3.41% |
| 40 | Salbutamol inhaler             | 1     | 1   | 1.03 | 1.1 | 3.35%  |
| 41 | Simvastatin                    | 67.13 | 12  | 65.8 | 12  | -2.09% |
| 42 | Spirolactone                   | 8.6   | 0.8 | 10.1 | 1   | 14.5%  |
|    | Medians                        | 6.99  | 2.5 | 8.49 | 3.2 | 4.29%  |

**Table S4.** Change in median unit prices (MUPs) and median price ratios (MPRs) of the lowest price generics (LPGs) in private sector.

| Sr. no. | Medicines                 | MUPs 2017 (PKR) | MPR 2017 | Adjusted MUP in 2019 | MPR 2019 | Percentage change in MUPs/MPRs |
|---------|---------------------------|-----------------|----------|----------------------|----------|--------------------------------|
| 1       | Acetylsalicylic Acid      | 1.015           | 0.7      | 1.06                 | 0.7      | 4.58                           |
| 2       | Aciclovir                 | 12.4            | 3.6      | 13.5                 | 3.9      | 8.41                           |
| 3       | Amitriptyline             | 1.19            | 1.4      | 1.24                 | 1.4      | 3.86                           |
| 4       | Amlodipine                | 1.8             | 1.1      | 6.29                 | 3.8      | 71.4                           |
| 5       | Amoxicillin               | 5.8             | 1.9      | 8.32                 | 2.7      | 30.3                           |
| 6       | Amoxicillin (250)         | 3               | 1.8      | 3.48                 | 2.1      | 13.8                           |
| 7       | Atenolol                  | 2.05            | 1.8      | 2.47                 | 2.2      | 16.9                           |
| 8       | Atorvastatin              | 37.5            | 3.4      | 35.8                 | 3.2      | -4.8                           |
| 9       | Azithromycin              | 40              | 1.7      | 19.3                 | 0.8      | -107                           |
| 10      | Bisoprolol                | 6.55            | 0.7      | 6.56                 | 0.7      | 0.1                            |
| 11      | Captopril                 | 6.5             | 2.5      | 6.77                 | 2.7      | 3.97                           |
| 12      | Carbamazepine             | 3.3             | 1.7      | 4.35                 | 2.3      | 24.2                           |
| 13      | Ceftriaxone injection     | 280             | 6.8      | 290                  | 7        | 3.48                           |
| 14      | Ciprofloxacin             | 11              | 2.8      | 24.2                 | 6.2      | 54.5                           |
| 15      | Clarithromycin            | 36              | 1.4      | 42.7                 | 1.6      | 15.8                           |
| 16      | Co-trimoxazole suspension | 0.21            | 0.4      | 2.32                 | 4.7      | 91                             |
| 17      | Diclofenac                | 3.5             | 7.5      | 4.79                 | 10       | 26.9                           |
| 18      | Enalapril                 | 2.05            | 1.9      | 2.84                 | 2.6      | 27.8                           |
| 19      | Fluconazole               | 145.5           | 20       | 145                  | 20       | -0.3                           |
| 20      | Fluoxetine                | 13.8            | 3.1      | 13.5                 | 3        | -1.9                           |
| 21      | Fluphenazine Decanoate    | 90.5            | 1        | 93.8                 | 1.1      | 3.5                            |
| 22      | Glibenclamide             | 1.57            | 2.7      | 1.42                 | 2.4      | -10                            |
| 23      | Gliclazide                | 4.75            | 0.9      | 5.8                  | 1.1      | 18.1                           |

|    |                                   |            |            |             |            |             |
|----|-----------------------------------|------------|------------|-------------|------------|-------------|
| 24 | Insulin Isophane (NPH)            | 48         | 0.8        | 62.3        | 1.1        | 22.9        |
| 25 | Insulin Neutral Soluble (Regular) | 48         | 0.8        | 62.3        | 1          | 22.9        |
| 26 | Losartan                          | 11         | 0.9        | 13.1        | 1.1        | 15.7        |
| 27 | Metformin                         | 1.5        | 1          | 1.86        | 1.2        | 19.2        |
| 28 | Metronidazole                     | 1.5        | 1.2        | 1.93        | 1.6        | 22.4        |
| 29 | Nifedipine Retard                 | 2.65       | 1.3        | 5.14        | 2.4        | 48.4        |
| 30 | Omeprazole                        | 15.35      | 10         | 11.4        | 7.8        | -35         |
| 31 | Omeprazole (10)                   | 12.14      | 0.9        | 5.13        | 0.4        | -137        |
| 32 | Paracetamol suspension            | 0.47       | 0.9        | 1.02        | 1.9        | 53.7        |
| 33 | Propranolol                       | 0.66       | 0.9        | 2.03        | 2.8        | 67.5        |
| 34 | Pyrimethamine with sulfadoxine    | 5          | 1.2        | 4.84        | 1.2        | -3.4        |
| 35 | Ranitidine                        | 6.93       | 2.9        | 7.78        | 3.3        | 11          |
| 36 | Salbutamol inhaler                | 0.64       | 0.7        | 0.68        | 0.7        | 5.45        |
| 37 | Simvastatin                       | 8.5        | 1.6        | 16.6        | 3          | 48.7        |
|    | <b>Medians</b>                    | <b>5.8</b> | <b>1.4</b> | <b>6.29</b> | <b>2.3</b> | <b>15.7</b> |

**Table S5.** Affordability of originator brands (OBs) for different diseases in 2017 and 2019, in private sector.

| Disease                        | Medicine           | Strength    | Dosage form | No. of units needed per treatment | Durati on of treatm ent | MTP 2017 (PKR ) | NDWs 2017 | MTP 2019 (PKR ) | NDWs 2019 |
|--------------------------------|--------------------|-------------|-------------|-----------------------------------|-------------------------|-----------------|-----------|-----------------|-----------|
| <b>ASTHMA</b>                  | Salbutamol Inhaler | 100mcg/dose | Inhaler     | 200                               | As needed               | 200             | 0.4       | 214             | 0.4       |
|                                | Beclomethasone     | 50mcg/dose  | inhaler     | 200                               | As needed               | 250             | 0.5       | 380             | 0.8       |
| <b>Cardiovascular Diseases</b> | Bisoprolol         | 5mg         | tab         | 60                                | 30                      | 676.8           | 1.5       | 1003            | 2         |
|                                | Atenolol           | 50mg        | tab         | 30                                | 30                      | 185.7           | 0.4       | 190.5           | 0.4       |
|                                | Captopril          | 25mg        | tab         | 60                                | 30                      | 459.6           | 1         | 510             | 1         |
|                                | Amlodipine         | 5mg         | tab         | 60                                | 30                      | 715.8           | 1.5       | 780             | 1.6       |
|                                | Amiodarone         | 200mg       | tab         | 60                                | 30                      | 1066.8          | 2.3       | 1080            | 2.2       |
|                                | Losartan           | 50mg        | tab         | 60                                | 30                      | 3100.2          | 6.6       | 3120            | 6.2       |
|                                | methyldopa         | 250mg       | tab         | 90                                | 30                      | 574.2           | 1.2       | 729             | 1.5       |
| Nifedipine retard              | 20mg               | tab         | 90          | 30                                | 512.1                   | 1.1             | 540       | 1.1             |           |

|                                                     |                                   |          |         |     |    |        |     |       |     |
|-----------------------------------------------------|-----------------------------------|----------|---------|-----|----|--------|-----|-------|-----|
|                                                     | Spironolactone                    | 100mg    | tab     | 30  | 30 | 258    | 0.5 | 312   | 0.6 |
|                                                     | Propranolol                       | 40mg     | tab     | 90  | 30 | 139.5  | 0.3 | 284.4 | 0.6 |
|                                                     | Acetylsalicylic acid              | 75mg     | tab     | 30  | 30 | 34.8   | 0.1 | 34.8  | 0.1 |
| <b>Anti hyperlipidemics</b>                         | Simvastatin                       | 20mg     | Cap/tab | 30  | 30 | 2013.9 | 4.3 | 2040  | 4.1 |
|                                                     | Atorvastatin                      | 20mg     | Cap/tab | 30  | 30 | 6057   | 13  | 6105  | 12  |
| <b>Infections-Adult respiratory tract infection</b> | Ceftriaxone Injection             | 1g/vial  | Inj.    | 1   | 1  | 672    | 1.4 | 783   | 1.6 |
|                                                     | Ciprofloxacin                     | 500mg    | tab     | 14  | 7  | 705.6  | 1.5 | 735   | 1.5 |
|                                                     | Azithromycin                      | 500mg    | tab     | 3   | 3  | 120    | 0.3 | 367   | 0.7 |
|                                                     | clarithromycin                    | 500mg    | tab     | 28  | 14 | 1839.6 | 3.9 | 2212  | 4.4 |
|                                                     | Amoxicillin                       | 500mg    | cap     | 42  | 14 | 361.87 | 0.8 | 367.5 | 0.7 |
|                                                     | Amoxicillin                       | 250mg    | cap     | 84  | 14 | 299.04 | 0.6 | 315   | 0.6 |
| <b>Fungal Infection</b>                             | Fluconazole                       | 200mg    | cap     | 1   | 1  | 442    | 0.9 | 585   | 1.2 |
| <b>Viral Infection</b>                              | aciclovir                         | 200mg    | tab     | 25  | 5  | 1750   | 3.8 | 1875  | 3.8 |
| <b>Amoebiasis</b>                                   | metronidazole                     | 400mg    | tab     | 21  | 7  | 32.97  | 0.1 | 32.97 | 0.1 |
| <b>CNS Drugs-Anti epileptics</b>                    | Carbamezipine                     | 200mg    | tab     | 60  | 30 | 294.6  | 0.6 | 300   | 0.6 |
|                                                     | Phenytoin                         | 100mg    | tab     | 90  | 30 | 468    | 1   | 2160  | 4.3 |
| <b>Anxiety</b>                                      | diazepam                          | 5mg      | tab     | 90  | 30 | 180    | 0.4 | 180   | 0.4 |
| <b>Anti Diabetics</b>                               | Metformin                         | 500mg    | tab     | 90  | 30 | 138.6  | 0.3 | 151.2 | 0.3 |
|                                                     | Glibenclamide                     | 5mg      | tab     | 90  | 30 | 152    | 0.3 | 194.4 | 0.4 |
|                                                     | Gliclazide                        | 80mg     | tab     | 60  | 30 | 456    | 1.5 | 1020  | 2   |
|                                                     | Insulin Isophane (NPH)            | 100IU/ml | vial    | 10  | 30 | 645    | 1.4 | 758.8 | 1.5 |
|                                                     | Insulin Neutral Soluble (Regular) | 100IU/ml | vial    | 10  | 30 | 645    | 1.4 | 758.8 | 1.5 |
| <b>Ulcer Treatment</b>                              | Omeprazole                        | 20mg     | cap     | 30  | 30 | 1493.4 | 3.2 | 1569  | 3.1 |
|                                                     | ranitidine                        | 150mg    | tab     | 120 | 30 | 1056   | 2.3 | 1056  | 2.1 |
| <b>Pain/Inflammation Arthritis</b>                  | Paracetamol                       | 24mg/ml  | susp    | 45  | 3  | 38.25  | 0.1 | 102.6 | 0.2 |
|                                                     | Diclofenac                        | 50mg     | tab     | 90  | 30 | 506.25 | 1.1 | 522   | 1   |

Where, MTP: Median treatment price, NDWs: Number of days' wages



**Table S6.** Affordability of lowest price generics (LPGs) for different diseases in 2017 and 2019, in private sector.

| Disease/Condition                            | Medicine              | Strength    | Dosage form | No. of units needed per treatment | Duration of treatment | MTP 2017 (PKR) | NDWs 2017 | MTP 2019 (PKR) | NDWs 2019 |
|----------------------------------------------|-----------------------|-------------|-------------|-----------------------------------|-----------------------|----------------|-----------|----------------|-----------|
| ASTHMA                                       | Salbutamol Inhaler    | 100mcg/dose | Inhaler     | 200                               | As needed             | 128            | 0.3       | 140            | 0.3       |
| Cardiovascular Diseases/ Anti Hypertensives  | Bisoprolol            | 5mg         | tab         | 60                                | 30                    | 393            | 0.8       | 406.8          | 0.8       |
|                                              | Atenolol              | 50mg        | tab         | 30                                | 30                    | 61.5           | 0.1       | 76.5           | 0.2       |
|                                              | Captopril             | 25mg        | tab         | 60                                | 30                    | 390            | 0.8       | 420            | 0.8       |
|                                              | Amlodipine            | 5mg         | tab         | 60                                | 30                    | 108            | 0.2       | 390            | 0.8       |
|                                              | Losartan              | 50mg        | tab         | 60                                | 30                    | 660            | 1.4       | 810            | 1.6       |
|                                              | Nifedipine retard     | 20mg        | tab         | 90                                | 30                    | 238.5          | 0.5       | 478.4          | 1         |
|                                              | Propranolol           | 40mg        | tab         | 90                                | 30                    | 59.4           | 0.1       | 189            | 0.4       |
|                                              | Acetylsalicylic acid  | 75mg        | tab         | 30                                | 30                    | 30.45          | 0.1       | 33             | 0.1       |
| Anti hyperlipidemics                         | Simvastatin           | 20mg        | Cap/tablet  | 30                                | 30                    | 255            | 0.5       | 513.8          | 1         |
|                                              | Atorvastatin          | 20mg        | Cap/tablet  | 30                                | 30                    | 1125           | 2.4       | 1110           | 2.2       |
| Infections-Adult respiratory tract infection | Ceftriaxone Injection | 1g/vial     | Inj.        | 1                                 | 1                     | 280            | 0.6       | 300            | 0.6       |
|                                              | Ciprofloxacin         | 500mg       | tab         | 14                                | 7                     | 154            | 0.3       | 350            | 0.7       |
|                                              | Azithromycin          | 500mg       | tab         | 3                                 | 3                     | 120            | 0.3       | 60             | 0.1       |
|                                              | clarithromycin        | 500mg       | tab         | 28                                | 14                    | 1008           | 2.2       | 1238           | 2.5       |
|                                              | Amoxicillin           | 500mg       | cap         | 42                                | 14                    | 243.6          | 0.5       | 361.2          | 0.7       |
|                                              | Amoxicillin           | 250mg       | cap         | 84                                | 14                    | 252            | 0.5       | 302.4          | 0.6       |
| Fungal Infection                             | Fluconazole           | 200mg       | cap         | 1                                 | 1                     | 145.5          | 0.3       | 150            | 0.3       |
| Viral Infection                              | aciclovir             | 200mg       | tab         | 25                                | 5                     | 310            | 0.7       | 350            | 0.7       |
| Amoebiasis                                   | metronidazole         | 400mg       | tab         | 21                                | 7                     | 31.5           | 0.1       | 42             | 0.1       |
| CNS Drugs-Anti epileptics                    | Carbamezipine         | 200mg       | tab         | 60                                | 30                    | 198            | 0.4       | 270            | 0.5       |
| Depression                                   | Amitriptyline         | 25mg        | tab         | 60                                | 30                    | 71.4           | 0.2       | 76.8           | 0.2       |

|    |                 |             |          |      |     |    |       |     |       |     |
|----|-----------------|-------------|----------|------|-----|----|-------|-----|-------|-----|
| 1  | Anti Diabetics  | Metformin   | 500mg    | tab  | 90  | 30 | 135   | 0.3 | 180   | 0.4 |
| 2  |                 | Glibenclami | 5mg      | tab  | 90  | 30 | 141   | 0   | 132.3 | 0.3 |
| 3  |                 | de          |          |      |     |    |       |     |       |     |
| 4  |                 | Gliclazide  | 80mg     | tab  | 60  | 30 | 285   | 0.8 | 360   | 0.7 |
| 5  |                 | Insulin     | 100IU/ml | vial | 10  | 30 | 480   | 1   | 644   | 1.3 |
| 6  |                 | Isophane    |          |      |     |    |       |     |       |     |
| 7  |                 | (NPH)       |          |      |     |    |       |     |       |     |
| 8  |                 | Insulin     | 100IU/ml | vial | 10  | 30 | 480   | 1   | 644   | 1.3 |
| 9  |                 | Neutral     |          |      |     |    |       |     |       |     |
| 10 |                 | Soluble     |          |      |     |    |       |     |       |     |
| 11 |                 | (Regular)   |          |      |     |    |       |     |       |     |
| 12 | Ulcer Treatment | Omeprazole  | 20mg     | cap  | 30  | 30 | 460.5 | 1   | 353.7 | 0.7 |
| 13 |                 | ranitidine  | 150mg    | tab  | 120 | 30 | 831.6 | 1.8 | 966   | 1.9 |
| 14 | Pain/Inflammati | Paracetamol | 24mg/ml  | susp | 45  | 3  | 21.15 | 0   | 47.25 | 0.1 |
| 15 | on              |             |          |      |     |    |       |     |       |     |
| 16 | Arthritis       | Diclofenac  | 50mg     | tab  | 90  | 30 | 315   | 0.7 | 445.5 | 0.9 |

peer review only

## STROBE—checklist

|                              | Item No. | Recommendation                                                                                                                                                                                                                                                                                                                                                                                                                                                         | Page No. | Relevant text from manuscript |
|------------------------------|----------|------------------------------------------------------------------------------------------------------------------------------------------------------------------------------------------------------------------------------------------------------------------------------------------------------------------------------------------------------------------------------------------------------------------------------------------------------------------------|----------|-------------------------------|
| <b>Title and abstract</b>    | 1        | (a) Indicate the study's design with a commonly used term in the title or the abstract                                                                                                                                                                                                                                                                                                                                                                                 | 1        | Cross-sectional               |
|                              |          | (b) Provide in the abstract an informative and balanced summary of what was done and what was found                                                                                                                                                                                                                                                                                                                                                                    | 2        |                               |
| <b>Introduction</b>          |          |                                                                                                                                                                                                                                                                                                                                                                                                                                                                        |          |                               |
| Background/rationale         | 2        | Explain the scientific background and rationale for the investigation being reported                                                                                                                                                                                                                                                                                                                                                                                   | 4        |                               |
| Objectives                   | 3        | State specific objectives, including any prespecified hypotheses                                                                                                                                                                                                                                                                                                                                                                                                       | 5        |                               |
| <b>Methods</b>               |          |                                                                                                                                                                                                                                                                                                                                                                                                                                                                        |          |                               |
| Study design                 | 4        | Present key elements of study design early in the paper                                                                                                                                                                                                                                                                                                                                                                                                                | 5        |                               |
| Setting                      | 5        | Describe the setting, locations, and relevant dates, including periods of recruitment, exposure, follow-up, and data collection                                                                                                                                                                                                                                                                                                                                        | 5,6      |                               |
| Participants                 | 6        | (a) <i>Cohort study</i> —Give the eligibility criteria, and the sources and methods of selection of participants. Describe methods of follow-up<br><i>Case-control study</i> —Give the eligibility criteria, and the sources and methods of case ascertainment and control selection. Give the rationale for the choice of cases and controls<br><i>Cross-sectional study</i> —Give the eligibility criteria, and the sources and methods of selection of participants | 6        | WHO/HAI methodology           |
|                              |          | (b) <i>Cohort study</i> —For matched studies, give matching criteria and number of exposed and unexposed<br><i>Case-control study</i> —For matched studies, give matching criteria and the number of controls per case                                                                                                                                                                                                                                                 |          | N.A                           |
| Variables                    | 7        | Clearly define all outcomes, exposures, predictors, potential confounders, and effect modifiers. Give diagnostic criteria, if applicable                                                                                                                                                                                                                                                                                                                               | 6,7      |                               |
| Data sources/<br>measurement | 8*       | For each variable of interest, give sources of data and details of methods of assessment (measurement). Describe comparability of assessment methods if there is more than one group                                                                                                                                                                                                                                                                                   | 5,6,7    |                               |
| Bias                         | 9        | Describe any efforts to address potential sources of bias                                                                                                                                                                                                                                                                                                                                                                                                              | 5,6,7,   | WHO/HAI validated methodology |
| Study size                   | 10       | Explain how the study size was arrived at                                                                                                                                                                                                                                                                                                                                                                                                                              | 5,6,7    |                               |

|                        |     |                                                                                                                                                                                                                    |          |              |
|------------------------|-----|--------------------------------------------------------------------------------------------------------------------------------------------------------------------------------------------------------------------|----------|--------------|
| Quantitative variables | 11  | Explain how quantitative variables were handled in the analyses. If applicable, describe which groupings were chosen and why                                                                                       | 6,7      |              |
| Statistical methods    | 12  | (a) Describe all statistical methods, including those used to control for confounding                                                                                                                              | 7        |              |
|                        |     | (b) Describe any methods used to examine subgroups and interactions                                                                                                                                                | N.A      |              |
|                        |     | (c) Explain how missing data were addressed                                                                                                                                                                        | N.A      |              |
|                        |     | (d) <i>Cohort study</i> —If applicable, explain how loss to follow-up was addressed                                                                                                                                | N.A      |              |
|                        |     | <i>Case-control study</i> —If applicable, explain how matching of cases and controls was addressed<br><i>Cross-sectional study</i> —If applicable, describe analytical methods taking account of sampling strategy |          |              |
|                        |     | (e) Describe any sensitivity analyses                                                                                                                                                                              |          | N.A          |
| <b>Results</b>         |     |                                                                                                                                                                                                                    |          |              |
| Participants           | 13* | (a) Report numbers of individuals at each stage of study—eg numbers potentially eligible, examined for eligibility, confirmed eligible, included in the study, completing follow-up, and analysed                  | N.A      |              |
|                        |     | (b) Give reasons for non-participation at each stage                                                                                                                                                               |          |              |
|                        |     | (c) Consider use of a flow diagram                                                                                                                                                                                 |          |              |
| Descriptive data       | 14* | (a) Give characteristics of study participants (eg demographic, clinical, social) and information on exposures and potential confounders                                                                           | N.A      |              |
|                        |     | (b) Indicate number of participants with missing data for each variable of interest                                                                                                                                | N.A      |              |
|                        |     | (c) <i>Cohort study</i> —Summarise follow-up time (eg, average and total amount)                                                                                                                                   | N.A      |              |
| Outcome data           | 15* | <i>Cohort study</i> —Report numbers of outcome events or summary measures over time                                                                                                                                | N.A      |              |
|                        |     | <i>Case-control study</i> —Report numbers in each exposure category, or summary measures of exposure                                                                                                               | N.A      |              |
|                        |     | <i>Cross-sectional study</i> —Report numbers of outcome events or summary measures                                                                                                                                 | 7-11     |              |
| Main results           | 16  | (a) Give unadjusted estimates and, if applicable, confounder-adjusted estimates and their precision (eg, 95% confidence interval). Make clear which confounders were adjusted for and why they were included       | 7,8,9,10 | Main results |
|                        |     | (b) Report category boundaries when continuous variables were categorized                                                                                                                                          | N.A      |              |
|                        |     | (c) If relevant, consider translating estimates of relative risk into absolute risk for a meaningful time period                                                                                                   |          | N.A          |

Continued on next page

1  
2  
3  
4  
5  
6  
7  
8  
9  
10  
11  
12  
13  
14  
15  
16  
17  
18  
19  
20  
21  
22  
23  
24  
25  
26  
27  
28  
29  
30  
31  
32  
33  
34  
35  
36  
37  
38  
39  
40  
41  
42  
43  
44  
45  
46

|                          |    |                                                                                                                                                                            |       |
|--------------------------|----|----------------------------------------------------------------------------------------------------------------------------------------------------------------------------|-------|
| Other analyses           | 17 | Report other analyses done—eg analyses of subgroups and interactions, and sensitivity analyses                                                                             |       |
| <b>Discussion</b>        |    |                                                                                                                                                                            |       |
| Key results              | 18 | Summarise key results with reference to study objectives                                                                                                                   | 11    |
| Limitations              | 19 | Discuss limitations of the study, taking into account sources of potential bias or imprecision. Discuss both direction and magnitude of any potential bias                 | 14    |
| Interpretation           | 20 | Give a cautious overall interpretation of results considering objectives, limitations, multiplicity of analyses, results from similar studies, and other relevant evidence | 11-14 |
| Generalisability         | 21 | Discuss the generalisability (external validity) of the study results                                                                                                      | 11-14 |
| <b>Other information</b> |    |                                                                                                                                                                            |       |
| Funding                  | 22 | Give the source of funding and the role of the funders for the present study and, if applicable, for the original study on which the present article is based              | 15    |
